# Supplementary material for: A novel curation system to facilitate data integration across regional citizen science survey programs
Source: PeerJ. 2020 Jul 29;8:e9219. doi: 10.7717/peerj.9219 (PMC7395600; doi:10.7717/peerj.9219)
Supplement: Supplemental Information 3 — Only taxa with deviations between lists are shown here. Relevant interpretations of base lists (and in some cases other authorities) are noted in column V. Deviation types between each pairwise comparison of base lists are summarized in columns W-AB. Number of deviation types for each pairwise comparison are tallied at the bottom of this table, see also Table 3 in text. Mismatches are coded as follows: Unmatched (N) = Purple: at least one base list does not include this taxon concept even under any other name. Further coded with rough reason for mismatch: r= rarely found in North America; n= newly described species, ?= reason for missing term is not clarified here. Subfamily deviation = Red (F). Genus-level name deviation = Orange (G). Species-level name deviation because of promotion from subspecies to species = Blue (P). Species-level name deviation, different synonym used = Yellow (S). Species-level spelling deviation = Green (L). [file peerj-08-9219-s003.xlsx]

## Sheet: S1-base lists aligned only devs
ITIS					Pelham					NABA						O&W
Family	Subfamily	Genus	Species	Subspecies included	Family	Subfamily	Genus	Species	Subspecies included	Familly	Subfamily	Genus	Species	Subspecies included	Common Name	Family	Subfamily	Genus	Species	Subspecies included	Notes	ITIS-Pelham	ITIS-NABA	ITIS-O&W	Pelham-NABA	Pelham-O&W	NABA-O&W
			N(r)		Nymphalidae	Charaxinae	Archaeoprepona	demophon	centralis				N(r)						N(r)		Pelham: Recorded from Texas by Bordelon (2008), News Lepid. Soc. 50(supplement S1): 91.	N(r)			N(r)	N(r)
Nymphalidae	Charaxinae	Anaea	troglodyta	floridalis	Nymphalidae	Charaxinae	Anaea	troglodyta	floridalis	Nymphalidae	Charaxinae	Anaea	floridalis		Florida Leafwing	Nymphalidae	Charaxinae	Anaea	troglodyta	floridalis	O&W: [Includes floridalis F. Johnson & W.P. Comstock, 1941, in accordance with Lamas (in press), but see discussion by Smith et al. (1994: p. 65).]		P		P		P
Nymphalidae	Charaxinae	Memphis	glycerium	glycerium	Nymphalidae	Charaxinae	Fountainea	glycerium	glycerium	Nymphalidae	Charaxinae	Anaea	glycerium		Angled Leafwing	Nymphalidae	Charaxinae	Memphis	glycerium			G	G		G	G	G
Nymphalidae	Charaxinae	Memphis	pithyusa	pithyusa	Nymphalidae	Charaxinae	Memphis	pithyusa	pithyusa	Nymphalidae	Charaxinae	Anaea	pithyusa		Pale-spotted Leafwing	Nymphalidae	Charaxinae	Memphis	pithyusa				G		G	G
Nymphalidae	Charaxinae	Memphis	echemus	echemus	Nymphalidae	Charaxinae	Memphis	echemus	echemus				N(r)			Nymphalidae	Charaxinae	Memphis	echemus		Pelham: The singe record of this species from the United States (R. Kendall and Mcguire (1984), Bull. Allyn Mus. (86): 38-39, figs. 36 ♀ D, 36a ♀ V) apparently represents a rare stray or human-assisted import.		N(r)		N(r)		N(r)
			N(r)		Nymphalidae	Charaxinae	Memphis	forreri					N(r)						N(r)		Pelham: Recorded from Texas by Bordelon (2008), News Lepid. Soc. 50(supplement S1): 91.	N(r)			N(r)	N(r)
Nymphalidae	Danainae	Lycorea	halia	atergatis, demeter, cleobaea	Nymphalidae	Danainae	Lycorea	halia	atergatis, demeter	Nymphalidae	Danainae	Lycorea	cleobaea		Tiger Mimic-Queen	Nymphalidae	Danainae	Lycorea	halia		O&W: [Central American populations are sometimes treated as species cleobaea (Godart, 1819), e.g. Miller & Brown (1981), Schwartz (1989), Brown (1992), and Smith et al. 33 (1994); but see Lamas (in press).]		S		S		S
Nymphalidae	Heliconiinae	Boloria	alaskensis	alaskensis, halli	Nymphalidae	Heliconiinae	Boloria	alaskensis	alaskensis	Nymphalidae	Heliconiinae	Boloria	napaea		Mountain Fritillary	Nymphalidae	Heliconiinae	Boloria	alaskensis		O&W: [Boloria napaea (Hoffmansegg, 1804) is a separate Eurasian species with differing genitalia that reportedly occurs sympatrically with alaskensis at some locations. See discussions by Crosson du Cormier (1977), Dubatolov (1992), Kosterin (2000), Tuzov et al. (2000), and Gorbunov (2001).] Pelham: Crosson du Cormier (1977), Alexanor 10(1): 35-47, detailed the separation of this species from B. …		P		P		P
Nymphalidae	Heliconiinae	Boloria	chariclea	montinus	Nymphalidae	Heliconiinae	Boloria	chariclea	montinus	Nymphalidae	Heliconiinae	Boloria	montinus		Purplish Fritillary	Nymphalidae	Heliconiinae	Boloria	chariclea	montinus	NABA: decided to retain the traditional status of the First Edition, that there are two species in North America – a more southerly taiga-dwelling species (i.e.montinus (former “titania”), of the boreal zone and one of the tundra zone (chariclea). Layberry et al. (1998) state “the tundra form flies in alpine meadows with the taiga form occurring in the boreal forest of nearby valleys with no evid…		P		P		P
			N(r)		Nymphalidae	Heliconiinae	Dione	juno					N(r)						N(r)		Pelham lists type locality as Mexico - probably rare stray into US	N(r)			N(r)	N(r)
Nymphalidae	Heliconiinae	Speyeria	hesperis	beani, brico, capitanensis, chitone, cottlei, dodgei, dorothea, electa, elko, greyi, hanseni, helena, hesperis, hutchinsi, irene, lurana, nausicaa, ratonensis, schellbachi, tetonia, viola	Nymphalidae	Heliconiinae	Speyeria	hesperis	beani, brico, capitanensis, chitone, cottlei, dennisi, dodgei, dorothea, electa, elko, greyi, hanseni, hesperis, hutchinsi, irene, lurana, nausicaa, ratonensis, schellbachi, tetonia, viola	Nymphalidae	Heliconiinae	Speyeria	atlantis	hesperis (Hesperis' Atlantis Fritillary), nausicaa (Southwestern' Atlantis Fritillary)	Atlantis Fritillary	Nymphalidae	Heliconiinae	Speyeria	hesperis				P		P		P
Nymphalidae	Heliconiinae	Speyeria	carolae		Nymphalidae	Heliconiinae	Speyeria	carolae		Nymphalidae	Heliconiinae	Speyeria	zerene	carolae	'Spring Mountains' Zerene Fritillary	Nymphalidae	Heliconiinae	Speyeria	carolae		NABA: carolae is an isolated greater fritillary population in the Spring Mountains of S. Nevada		P		P		P
Nymphalidae	Danainae	Dircenna	klugii		Nymphalidae	Danainae	Dircenna	klugii		Nymphalidae	Ithomiinae	Dircenna	klugii		Klug's Clearwing	Nymphalidae	Danainae	Dircenna	klugii				F		F		F
Nymphalidae	Libytheinae	Libytheana	motya		Nymphalidae	Libytheinae	Libytheana	motya					N(r)			Nymphalidae	Libytheinae	Libytheana	motya		O&W: [Heitzman & Heitzman (1973) reported this species from Texas as rare strays or temporary colonists from Cuba; see Alayo and Hernández (1981).] Pelham: Type Locality: Not stated; this is a Cuban species. Recorded from Texas by J. Heitzman and R. Heitzman (1973), J. Res. Lepid. 10(4): 284-286.		N(r)		N(r)		N(r)
Nymphalidae	Limenitidinae	Adelpha	californica		Nymphalidae	Limenitidinae	Adelpha	californica		Nymphalidae	Limenitidinae	Adelpha	bredowii		California Sister	Nymphalidae	Limenitidinae	Adelpha	bredowii		Pelham: Prudic et al. (2008), Zootaxa 1819: 1–24, detail the distinction between A. eulalia, A. californica and A. bredowii Geyer, 1837, in: Hübner, Zutr. z. Samml. exot. Schmett. 5: pl. [142], figs. 825 ♂ D, 826 ♂ V; 10, no. 413. Adelpha bredowii does not occur in the United States.		S	S	S	S
Nymphalidae	Limenitidinae	Adelpha	eulalia		Nymphalidae	Limenitidinae	Adelpha	eulalia		Nymphalidae	Limenitidinae	Adelpha	bredowii		California Sister	Nymphalidae	Limenitidinae	Adelpha	bredowii		Pelham: Prudic et al. (2008), Zootaxa 1819: 1–24, detail the distinction between A. eulalia, A. californica and A. bredowii Geyer, 1837, in: Hübner, Zutr. z. Samml. exot. Schmett. 5: pl. [142], figs. 825 ♂ D, 826 ♂ V; 10, no. 413. Adelpha bredowii does not occur in the United States.		S	S	S	S
Nymphalidae	Biblidinae	Biblis	hyperia	aganisa	Nymphalidae	Biblidinae	Biblis	hyperia	aganisa	Nymphalidae	Limenitidinae	Biblis	hyperia		Red Rim	Nymphalidae	Biblidinae	Biblis	hyperia				F		F		F
Nymphalidae	Biblidinae	Dynamine	dyonis		Nymphalidae	Biblidinae	Dynamine	dyonis		Nymphalidae	Limenitidinae	Dynamine	dyonis		Blue-eyed Sailor	Nymphalidae	Biblidinae	Dynamine	dyonis				F		F		F
Nymphalidae	Biblidinae	Epiphile	adrasta	adrasta	Nymphalidae	Biblidinae	Epiphile	adrasta	adrasta	Nymphalidae	Limenitidinae	Epiphile	adrasta		Common Banner	Nymphalidae	Biblidinae	Epiphile	adrasta				F		F		F
Nymphalidae	Biblidinae	Eunica	monima		Nymphalidae	Biblidinae	Eunica	monima		Nymphalidae	Limenitidinae	Eunica	monima		Dingy Purplewing	Nymphalidae	Biblidinae	Eunica	monima				F		F		F
Nymphalidae	Biblidinae	Eunica	tatila	tatila, tatilista	Nymphalidae	Biblidinae	Eunica	tatila	tatila, tatilista	Nymphalidae	Limenitidinae	Eunica	tatila		Florida Purplewing	Nymphalidae	Biblidinae	Eunica	tatila				F		F		F
Nymphalidae	Biblidinae	Hamadryas	amphichloe	diasia	Nymphalidae	Biblidinae	Hamadryas	amphichloe	diasia	Nymphalidae	Limenitidinae	Hamadryas	amphichloe		Pale Cracker	Nymphalidae	Biblidinae	Hamadryas	amphichloe				F		F		F
Nymphalidae	Biblidinae	Hamadryas	amphinome	mexicana	Nymphalidae	Biblidinae	Hamadryas	amphinome	mexicana	Nymphalidae	Limenitidinae	Hamadryas	amphinome		Red Cracker	Nymphalidae	Biblidinae	Hamadryas	amphinome				F		F		F
Nymphalidae	Biblidinae	Hamadryas	atlantis	lelaps	Nymphalidae	Biblidinae	Hamadryas	atlantis	lelaps	Nymphalidae	Limenitidinae	Hamadryas	atlantis		Black-patched Cracker	Nymphalidae	Biblidinae	Hamadryas	atlantis				F		F		F
Nymphalidae	Biblidinae	Hamadryas	februa	ferentina	Nymphalidae	Biblidinae	Hamadryas	februa	ferentina	Nymphalidae	Limenitidinae	Hamadryas	februa		Gray Cracker	Nymphalidae	Biblidinae	Hamadryas	februa				F		F		F
Nymphalidae	Biblidinae	Hamadryas	feronia	farinulenta	Nymphalidae	Biblidinae	Hamadryas	feronia	farinulenta	Nymphalidae	Limenitidinae	Hamadryas	feronia		Variable Cracker	Nymphalidae	Biblidinae	Hamadryas	feronia				F		F		F
Nymphalidae	Biblidinae	Hamadryas	glauconome	grisea	Nymphalidae	Biblidinae	Hamadryas	glauconome	glauconome, grisea	Nymphalidae	Limenitidinae	Hamadryas	glauconome		Glaucous Cracker	Nymphalidae	Biblidinae	Hamadryas	glauconome				F		F		F
Nymphalidae	Biblidinae	Hamadryas	guatemalena	marmarice	Nymphalidae	Biblidinae	Hamadryas	guatemalena	marmarice	Nymphalidae	Limenitidinae	Hamadryas	guatemalena		Guatemalan Cracker	Nymphalidae	Biblidinae	Hamadryas	guatemalena				F		F		F
Nymphalidae	Biblidinae	Hamadryas	iphthime	joannae	Nymphalidae	Biblidinae	Hamadryas	iphthime	joannae				N(r)						N(r)		Rare stray from South America		N(r)	N(r)	N(r)	N(r)
Nymphalidae	Nymphalinae	Historis	acheronta	acheronta	Nymphalidae	Nymphalinae	Historis	acheronta	acheronta	Nymphalidae	Limenitidinae	Historis	acheronta		Tailed Cecropian	Nymphalidae	Nymphalinae	Historis	acheronta				F		F		F
Nymphalidae	Nymphalinae	Historis	odius	odius, dious	Nymphalidae	Nymphalinae	Historis	odius	odius, dious	Nymphalidae	Limenitidinae	Historis	odius		Orion Cecropian	Nymphalidae	Nymphalinae	Historis	odius				F		F		F
Nymphalidae	Cyrestinae	Marpesia	chiron		Nymphalidae	Cyrestinae	Marpesia	chiron		Nymphalidae	Limenitidinae	Marpesia	chiron		Many-banded Daggerwing	Nymphalidae	Limenitidinae	Marpesia	chiron				F	F	F	F
Nymphalidae	Cyrestinae	Marpesia	zerynthia	dentigera	Nymphalidae	Cyrestinae	Marpesia	zerynthia	dentigera	Nymphalidae	Limenitidinae	Marpesia	coresia		Waiter Daggerwing	Nymphalidae	Limenitidinae	Marpesia	zerynthia		O&W: [This species is occasionally listed as M. coresia (Godart, [1824]), a junior synonym of zerynthia (see Neild 1996).]		S, F	F	S, F	F	S
Nymphalidae	Cyrestinae	Marpesia	eleuchea	eleuchea	Nymphalidae	Cyrestinae	Marpesia	eleuchea	eleuchea	Nymphalidae	Limenitidinae	Marpesia	eleuchea		Antillean Daggerwing	Nymphalidae	Limenitidinae	Marpesia	eleuchea				F	F	F	F
Nymphalidae	Cyrestinae	Marpesia	petreus	petreus	Nymphalidae	Cyrestinae	Marpesia	petreus	petreus	Nymphalidae	Limenitidinae	Marpesia	petreus		Ruddy Daggerwing	Nymphalidae	Limenitidinae	Marpesia	petreus				F	F	F	F
Nymphalidae	Biblidinae	Mestra	amymone		Nymphalidae	Biblidinae	Mestra	amymone		Nymphalidae	Limenitidinae	Mestra	amymone		Common Mestra	Nymphalidae	Biblidinae	Mestra	amymone		O&W: [This is sometimes treated as a subspecies of the Jamaican M. dorcas (Fabricius, 1775), e.g. Lamas (in press).] Pelham: This taxon is considered a subspecies of Mestra dorcas Fabricius, 1775, Syst. Entomol.: 508, no. 275, by Lamas and Small (1992), in: Quintero and Aiello (Eds.), Ins. Panama Mesoamer.: 556, A. Warren, Vargas, Luis and Llorente (1998), J. Lepid. Soc. 52(1): 61 and Lamas et al…		F		F		F
Nymphalidae	Biblidinae	Myscelia	cyananthe	skinneri	Nymphalidae	Biblidinae	Myscelia	cyananthe	skinneri	Nymphalidae	Limenitidinae	Myscelia	cyananthe		Blackened Bluewing	Nymphalidae	Biblidinae	Myscelia	cyananthe				F		F		F
Nymphalidae	Biblidinae	Myscelia	ethusa	ethusa	Nymphalidae	Biblidinae	Myscelia	ethusa	ethusa	Nymphalidae	Limenitidinae	Myscelia	ethusa		Mexican Bluewing	Nymphalidae	Biblidinae	Myscelia	ethusa				F		F		F
Nymphalidae	Nymphalinae	Smyrna	blomfildia	datis	Nymphalidae	Nymphalinae	Smyrna	blomfildia	datis	Nymphalidae	Limenitidinae	Smyrna	blomfildia		Blomfild's Beauty	Nymphalidae	Nymphalinae	Smyrna	blomfildia				F		F		F
Nymphalidae	Morphinae	Morpho	polyphemus	polyphemus	Nymphalidae	Charaxinae	Morpho	polyphemus	polyphemus	Nymphalidae	Morphinae	Morpho	polyphemus		White Morpho	Nymphalidae	Morphinae	Morpho	polyphemus			F			F	F
Nymphalidae	Nymphalinae	Chlosyne	melitaeoides		Nymphalidae	Nymphalinae	Chlosyne	melitaeoides		Nymphalidae	Nymphalinae	Chlosyne	marina		Red-spotted Patch	Nymphalidae	Nymphalinae	Chlosyne	melitaeoides				S		S		S
Nymphalidae	Nymphalinae	Chlosyne	eumeda		Nymphalidae	Nymphalinae	Chlosyne	eumeda		Nymphalidae	Nymphalinae	Chlosyne	marina		Red-spotted Patch	Nymphalidae	Nymphalinae	Chlosyne	eumeda		O&W: [Kons (2000) and Luis et al. (2003) consider eumeda, melitaeoides and marina (Geyer, 1837) to be separate species (these were lumped by Scott (1986) without justification). The report from Pima Co., Arizona, appears to be of the semi-desert species, eumeda; however, C. marina also occurs in Sonora, Mexico, in montane habitats.]		S		S		S
Nymphalidae	Nymphalinae	Chlosyne	theona	chinatiensis	Nymphalidae	Nymphalinae	Chlosyne	theona	chinatiensis	Nymphalidae	Nymphalinae	Chlosyne	chinatiensis		Chinati Checkerspot	Nymphalidae	Nymphalinae	Chlosyne	theona	chinatiensis	NABA: Austin and Smith (1999) illustrated a number of specimens collected in western Texas that they believe are hybrids between chinatiensis and theona. Theona is an extremely variable species, and looking at the individuals illustrated, it is not clear that most of them necessarily are of a hybrid origin. If there is occasional hybridization between these taxa, that, in and of itself, is not su…		P		P		P
Nymphalidae	Nymphalinae	Chlosyne	damoetas	damoetas, windriver, altalus	Nymphalidae	Nymphalinae	Chlosyne	damoetas	damoetas, windriver, altalus	Nymphalidae	Nymphalinae	Chlosyne	whitneyi		Rockslide Checkerspot	Nymphalidae	Nymphalinae	Chlosyne	whitneyi	damoetas	O&W: whitneyi [Tentatively includes damoetas (Skinner, 1902), following Scott (1998) and Kons (2000), but further elaboration on the relationships of taxa in this group is needed.] NABA? No note, assume whitneyi includes damoetas Pelham: Original Combination: Chlosyne whitneyi windriver, Chlosyne whitneyi altalus. This indicates that at least some of this species was considered whitneyi originall…		P	P	P	P
Nymphalidae	Nymphalinae	Euphydryas	colon	colon, nevadensis, paradoxa, sperryi, svilhae, wallacensis	Nymphalidae	Nymphalinae	Euphydryas	colon	colon, nevadensis, paradoxa, sperryi, svilhae, wallacensis	Nymphalidae	Nymphalinae	Euphydryas	chalcedona	colon	'Snowberry' Variable Checkerspot	Nymphalidae	Nymphalinae	Euphydryas	chalcedona		O&W: We tentatively consider colon (W.H. Edwards, 1881) to be conspecific with chalcedona, but again, much additional research is needed. A recent study by Zimmerman et al. (2000) did not resolve relationships among these taxa.]		P	P	P	P
Nymphalidae	Nymphalinae	Euphydryas	anicia	alena, anicia, bakeri, bernadetta, brucei, capella, carmentis, chuskae, cloudcrofti, effi, eurytion, helvia, hermosa, hopfingeri, howlandi, macyi, magdalena, maria, morandi, variicolor, veazieae, wecoeut, wheeleri, windi	Nymphalidae	Nymphalinae	Euphydryas	anicia	alena, anicia, bakeri, bernadetta, brucei, capella, carmentis, chuskae, cloudcrofti, effi, eurytion, helvia, hermosa, hopfingeri, howlandi, macyi, magdalena, maria, morandi, variicolor, veazieae, wecoeut, wheeleri, windi	Nymphalidae	Nymphalinae	Euphydryas	chalcedona	anicia	Anicia' Variable Checkerspot	Nymphalidae	Nymphalinae	Euphydryas	anicia				P		P		P
Nymphalidae	Nymphalinae	Nymphalis	l-album	j-album, watsoni	Nymphalidae	Nymphalinae	Nymphalis	l-album	j-album, watsoni	Nymphalidae	Nymphalinae	Nymphalis	vaualbum		Compton Tortoiseshell	Nymphalidae	Nymphalinae	Nymphalis	vaualbum		O&W: [Guppy & Shepard (2001: pp. 256-257) indicate that vaualbum may be a nomen nudum (see ICZN 1999), and use l-album (Esper, 1780) in its place. We feel this move is premature and retain the popular use of vaualbum for now, until the issue is addressed in more detail. See Sattler & Tremewan (1984) for further discussion.]		S	S	S	S
Nymphalidae	Nymphalinae	Aglais	urticae					N(r)		Nymphalidae	Nymphalinae	Nymphalis	urticae		Small Tortoiseshell	Nymphalidae	Nymphalinae	Aglais	urticae		O&W: [Several individuals of this common Palaearctic butterfly have been captured orphotographed (e.g. Glassberg 1992, Zirlin & Ingraham 1997, Zirlin 2002), and this species is likely either an occasional accidental introduction or, less likely, a periodic vagrant.]	N(r)			N(r)	N(r)
Nymphalidae	Nymphalinae	Phyciodes	pulchella	camillus, deltarufa, inornatus, montana, owimba, pulchella, sacramento, shoshoni, tutchone, vallis	Nymphalidae	Nymphalinae	Phyciodes	pulchella	camillus, deltarufa, inornatus, montana, owimba, pulchella, sacramento, shoshoni, tutchone, vallis	Nymphalidae	Nymphalinae	Phyciodes	campestris		Field Crescent	Nymphalidae	Nymphalinae	Phyciodes	pulchella		O&W: [Lectotype designation of pulchella by Emmel et al. (1998a) displaces pratensis (Behr, 1863). See Miller & Brown (1981) for synonymy of campestris (Behr, 1863).] Pelham: The use of this name over campestris (Behr, 1863) and pratensis (Behr, 1863), follows Scott (1994), Papilio (n.s.) 7: 65-73, reiterated by Kondla and C. Guppy (2002), J. Lepid. Soc. 56(3): 171-172. While the various aspects …		S		S		S
			N(r)		Nymphalidae	Nymphalinae	Phyciodes	pallescens					N(r)						N(r)		Rare in US. Pelham: Recorded from the United States by Stanford (2007), News Lepid. Soc. 49(4):116, 117, 2 photos, and McDermott (2009), News Lepid. Soc. 51(4): 117, 125, 4 figs. 754.	N(r)			N(r)	N(r)
Nymphalidae	Nymphalinae	Phyciodes	cocyta	cocyta, selenis, diminutor, pascoensis, arenacolor	Nymphalidae	Nymphalinae	Phyciodes	cocyta	cocyta, selenis, diminutor, pascoensis, arenacolor	Nymphalidae	Nymphalinae	Phyciodes	selenis		Northern Crescent	Nymphalidae	Nymphalinae	Phyciodes	cocyta		O&W: cocyta [supersedes selenis (W. Kirby, 1837), an apparent junior synonym; see Scott (1994).] NABA: "Scott (1994) stated that the name cocyta (Cramer) has priority over selenis. The basis for this is that, although the type of cocyta (Cramer) is lost, it was illustrated in “De Uitlandische Kapellen voorkomende in de drie waerelddeelen Asia, Africa en America, vol 2.” 1777 (1779) and Scott, who…		S		S		S
Nymphalidae	Nymphalinae	Phyciodes	graphica	vesta	Nymphalidae	Nymphalinae	Phyciodes	graphica		Nymphalidae	Nymphalinae	Phyciodes	vesta		Vesta Crescent	Nymphalidae	Nymphalinae	Phyciodes	graphica		O&W: [Phyciodes graphica, described in April, 1869, supersedes P. vesta (W.H. Edwards, 1869), which was described in September-October, 1869; see Lamas (in press).] Pelham: Original Combination: [Phyciodes Vesta] form Aestiva		P		P		P
			N(r)		Nymphalidae	Nymphalinae	Polygonia	haroldii					N(r)						N(r)		Pelham: Type Locality: “Mexico” Probably rare in NA	N(r)			N(r)	N(r)
Nymphalidae	Satyrinae	Cercyonis	meadii	meadii, alamosa, melania, damei	Nymphalidae	Charaxinae	Cercyonis	meadii	meadii, alamosa, melania, damei	Nymphalidae	Satyrinae	Cercyonis	meadii		Mead's Wood-Nymph	Nymphalidae	Satyrinae	Cercyonis	meadii			F			F	F
			N(n)		Nymphalidae	Charaxinae	Cercyonis	incognita					N(n)						N(n)		Pelham: J. Emmel, T. Emmel & Mattoon, 2012 Bull. Allyn Mus. (163): 2-5, (recent)	F, R			F, R	F, R
Nymphalidae	Satyrinae	Cercyonis	oetus	alkalorum, charon, oetus, pallescens, phocus	Nymphalidae	Charaxinae	Cercyonis	oetus	alkalorum, charon, oetus, pallescens, phocus	Nymphalidae	Satyrinae	Cercyonis	oetus		Small Wood-Nymph	Nymphalidae	Satyrinae	Cercyonis	oetus			F			F	F
Nymphalidae	Satyrinae	Cercyonis	pegala	alope, ariane, boopis, carsonensis, gabbii, incana, ino, nephele, olympus, paludum, paucilineatus, pegala, pluvialis, stephensi, texana, utahensis, walkerensis, wheeleri	Nymphalidae	Charaxinae	Cercyonis	pegala	alope, ariane, australosierra, boopis, carsonensis, gabbii, incana, ino, nephele, olympus, paludum, paucilineatus, pegala, pluvialis, stephensi, texana, utahensis, walkerensis, wheeleri	Nymphalidae	Satyrinae	Cercyonis	pegala		Common Wood-Nymph	Nymphalidae	Satyrinae	Cercyonis	pegala			F			F	F
Nymphalidae	Satyrinae	Cercyonis	sthenele	behrii, hypoleuca, masoni, paulus, silvestris, sineocellata, sthenele	Nymphalidae	Charaxinae	Cercyonis	sthenele	behrii, hypoleuca, masoni, paulus, silvestris, sineocellata, sthenele	Nymphalidae	Satyrinae	Cercyonis	sthenele		Great Basin Wood-Nymph	Nymphalidae	Satyrinae	Cercyonis	sthenele			F			F	F
Nymphalidae	Satyrinae	Coenonympha	haydenii		Nymphalidae	Charaxinae	Coenonympha	haydenii		Nymphalidae	Satyrinae	Coenonympha	haydenii		Hayden's Ringlet	Nymphalidae	Satyrinae	Coenonympha	haydenii			F			F	F
Nymphalidae	Satyrinae	Coenonympha	tullia	inornata, nipisiquit, ochracea, ampelos, california, mcisaaci, benjamini, mackenziei, yukonensis, mixturata, kodiak, insulana, yontocket, eryngii, eunomia, columbiana, mono, elko, pseudobrenda, subfusca, furcae	Nymphalidae	Charaxinae	Coenonympha	tullia	inornata, nipisiquit, ochracea, ampelos, california, mcisaaci, benjamini, mackenziei, yukonensis, mixturata, kodiak, insulana, yontocket, eryngii, eunomia, columbiana, mono, elko, pseudobrenda, subfusca, furcae	Nymphalidae	Satyrinae	Coenonympha	tullia	inornata (Inornate' Common Ringlet), nipisiquit ('Salt Marsh' Common Ringlet), ochracea (Ochre' Common Ringlet), ampelos (Northwest' Common Ringlet), california (California' Common Ringlet)	Common Ringlet	Nymphalidae	Satyrinae	Coenonympha	tullia	ampelos, california, inornata, kodiak, ochracea, nipisiquit	O&W: [Treated as a species complex by Ferris (1989c); also see Davenport (1941) and Brown (1955, 1961). Included here are several taxa sometimes considered full species (e.g. dos Passos 1958); these include (among others) ampelos W.H. Edwards, 1871, california Westwood, 1851, inornata W.H. Edwards, 1861, kodiak W.H. Edwards, 1869, ochracea W.H. Edwards, 1861, and nipisiquit McDunnough, 1939. Layb…	F			F	F
Nymphalidae	Satyrinae	Cyllopsis	gemma	gemma, freemani	Nymphalidae	Charaxinae	Cyllopsis	gemma	gemma, freemani	Nymphalidae	Satyrinae	Cyllopsis	gemma		Gemmed Satyr	Nymphalidae	Satyrinae	Cyllopsis	gemma			F			F	F
Nymphalidae	Satyrinae	Cyllopsis	pertepida	dorothea, maniola, avicula	Nymphalidae	Charaxinae	Cyllopsis	pertepida	dorothea, maniola, avicula	Nymphalidae	Satyrinae	Cyllopsis	pertepida		Canyonland Satyr	Nymphalidae	Satyrinae	Cyllopsis	pertepida			F			F	F
Nymphalidae	Satyrinae	Cyllopsis	pyracmon	pyracmon, henshawi	Nymphalidae	Charaxinae	Cyllopsis	pyracmon	henshawi	Nymphalidae	Satyrinae	Cyllopsis	pyracmon	pyracmon ('Nabokov's' Nabokov's Satyr), henshawi ('Henshaw's' Nabokov's Satyr)	Nabokov's Satyr	Nymphalidae	Satyrinae	Cyllopsis	pyracmon			F			F	F
Nymphalidae	Satyrinae	Lethe	anthedon	anthedon, borealis	Nymphalidae	Charaxinae	Lethe	anthedon	anthedon, borealis	Nymphalidae	Satyrinae	Enodia	anthedon		Northern Pearly-eye	Nymphalidae	Satyrinae	Enodia	anthedon			F			F	F
Nymphalidae	Satyrinae	Lethe	creola		Nymphalidae	Charaxinae	Lethe	creola		Nymphalidae	Satyrinae	Enodia	creola		Creole Pearly-eye	Nymphalidae	Satyrinae	Enodia	creola			F			F	F
Nymphalidae	Satyrinae	Lethe	portlandia	floralae, portlandia, missarkae	Nymphalidae	Charaxinae	Lethe	portlandia	floralae, portlandia, missarkae	Nymphalidae	Satyrinae	Enodia	portlandia		Southern Pearly-eye	Nymphalidae	Satyrinae	Enodia	portlandia			F			F	F
Nymphalidae	Satyrinae	Erebia	callias	callias	Nymphalidae	Charaxinae	Erebia	callias	callias	Nymphalidae	Satyrinae	Erebia	callias		Colorado Alpine	Nymphalidae	Satyrinae	Erebia	callias			F			F	F
Nymphalidae	Satyrinae	Erebia	disa	steckeri, subarctica	Nymphalidae	Charaxinae	Erebia	disa	steckeri, subarctica	Nymphalidae	Satyrinae	Erebia	disa		Disa Alpine	Nymphalidae	Satyrinae	Erebia	disa			F			F	F
Nymphalidae	Satyrinae	Erebia	mancinus		Nymphalidae	Charaxinae	Erebia	mancinus		Nymphalidae	Satyrinae	Erebia	mancinus		Taiga Alpine	Nymphalidae	Satyrinae	Erebia	mancinus			F			F	F
Nymphalidae	Satyrinae	Erebia	youngi	herscheli, youngi, rileyi	Nymphalidae	Charaxinae	Erebia	youngi	herscheli, youngi, rileyi	Nymphalidae	Satyrinae	Erebia	dabanensis		Four-dotted Alpine	Nymphalidae	Satyrinae	Erebia	youngi		equivalent: dabanensis= youngi; dabanensis is siberian		P		P		P
Nymphalidae	Satyrinae	Erebia	lafontainei		Nymphalidae	Charaxinae	Erebia	lafontainei		Nymphalidae	Satyrinae	Erebia	kozhantshikovi		Reddish Alpine	Nymphalidae	Satyrinae	Erebia	lafontainei		O&W: lists kozhantshikovi on deleted species list with note: [Erroneously reported from North America based on an unsupported assumption of conspecificity with lafontainei by Scott (1986); see Troubridge & Philip (1983) and Tuzov et al. (1997).] Pelham: Scott (1986), Butterflies N. Am.: 245-246, no. 121, considered lafontainei to be the North American representative of E. kozhantshikovi Sheljuzhk…		S		S		S
Nymphalidae	Satyrinae	Erebia	discoidalis	discoidalis	Nymphalidae	Charaxinae	Erebia	discoidalis	discoidalis	Nymphalidae	Satyrinae	Erebia	discoidalis		Red-disked Alpine	Nymphalidae	Satyrinae	Erebia	discoidalis			F			F	F
Nymphalidae	Satyrinae	Erebia	epipsodea	brucei, epipsodea, sineocellata, remingtoni	Nymphalidae	Charaxinae	Erebia	epipsodea	brucei, epipsodea, sineocellata, remingtoni	Nymphalidae	Satyrinae	Erebia	epipsodea		Common Alpine	Nymphalidae	Satyrinae	Erebia	epipsodea			F			F	F
Nymphalidae	Satyrinae	Erebia	fasciata	fasciata, avinoffi	Nymphalidae	Charaxinae	Erebia	fasciata	fasciata, avinoffi	Nymphalidae	Satyrinae	Erebia	fasciata		Banded Alpine	Nymphalidae	Satyrinae	Erebia	fasciata			F			F	F
Nymphalidae	Satyrinae	Erebia	magdalena	magdalena, saxicola	Nymphalidae	Charaxinae	Erebia	magdalena	magdalena, hilchie	Nymphalidae	Satyrinae	Erebia	magdalena		Magdalena Alpine	Nymphalidae	Satyrinae	Erebia	magdalena			F			F	F
Nymphalidae	Satyrinae	Erebia	mackinleyensis		Nymphalidae	Charaxinae	Erebia	mackinleyensis		Nymphalidae	Satyrinae	Erebia	magdalena		Magdalena Alpine	Nymphalidae	Satyrinae	Erebia	mackinleyensis		O&W: [See Hilchie (1990) and Layberry et al. (1998) for separation of mackinleyensis from magdalena; however, Gorbunov (2001) treats the two as conspecific.] Pelham: Hilchie (1990), Quaest. Entomol. 26(4): 673, considered this a species-level taxon. NABA: Layberry et al. (1998) “reluctantly” treated mackinleyensis as a distinct species, saying that “all other arctic butterflies with disjunct rang…	F	P		F, P	F	P
Nymphalidae	Satyrinae	Erebia	occulta	occulta	Nymphalidae	Charaxinae	Erebia	occulta	occulta													F			F	F
Nymphalidae	Satyrinae	Erebia	pawloskii	alaskensis, canadensis, ethela, demmia	Nymphalidae	Charaxinae	Erebia	pawloskii	alaskensis, canadensis, ethela, demmia	Nymphalidae	Satyrinae	Erebia	theano		Theano Alpine	Nymphalidae	Satyrinae	Erebia	pawloskii		O&W: [North American populations of this species have been referred to as Erebia theano (Tauscher, 1809), but Guppy & Shepard (2001) note that Erebia theano is restricted to eastern Siberia and Mongolia. See Tuzov et al. (1997).]	F	P		F, P	F	P
Nymphalidae	Satyrinae	Erebia	rossii	ornata, rossii, gabrieli, kuskoquima	Nymphalidae	Charaxinae	Erebia	rossii	ornata, rossii, gabrieli, kuskoquima	Nymphalidae	Satyrinae	Erebia	rossii		Ross' Alpine	Nymphalidae	Satyrinae	Erebia	rossii			F			F	F
Nymphalidae	Satyrinae	Erebia	vidleri		Nymphalidae	Charaxinae	Erebia	vidleri		Nymphalidae	Satyrinae	Erebia	vidleri		Vidler's Alpine	Nymphalidae	Satyrinae	Erebia	vidleri			F			F	F
Nymphalidae	Satyrinae	Gyrocheilus	patrobas	tritonia	Nymphalidae	Charaxinae	Gyrocheilus	patrobas	tritonia	Nymphalidae	Satyrinae	Gyrocheilus	patrobas		Red-bordered Satyr	Nymphalidae	Satyrinae	Gyrocheilus	patrobas			F			F	F
Nymphalidae	Satyrinae	Hermeuptychia	sosybius		Nymphalidae	Charaxinae	Hermeuptychia	sosybius		Nymphalidae	Satyrinae	Hermeuptychia	sosybius		Carolina Satyr	Nymphalidae	Satyrinae	Hermeuptychia	sosybius			F			F	F
Nymphalidae	Satyrinae	Hermeuptychia	sosybius		Nymphalidae	Charaxinae	Hermeuptychia	hermybius		Nymphalidae	Satyrinae	Hermeuptychia	sosybius			Nymphalidae	Satyrinae	Hermeuptychia	sosybius		Pelham: Described Grishin, 2014. Type Locality: “USA: Texas: Cameron County, east of Brownsville” Grishin, 2014 indicates that hermybius is a cryptic species within sosybius only realized by analysis of DNA/genetalia	F, S			F, S	F, S
Nymphalidae	Satyrinae	Hermeuptychia	sosybius		Nymphalidae	Charaxinae	Hermeuptychia	intricata		Nymphalidae	Satyrinae	Hermeuptychia	sosybius			Nymphalidae	Satyrinae	Hermeuptychia	sosybius		Pelham: Described Grishin, 2014. Type Locality: “USA: Texas: Fort Bend Co., Brazos Bend State Park, near Hale Lake, latitude 29°22'48.27", longitude −95°35'05.02", elevation 16 m” Grishin, 2014 indicates that intricata is a cryptic species within sosybius only realized by analysis of DNA/genetalia	F, S			F, S	F, S
Nymphalidae	Satyrinae	Megisto	cymela	cymela, viola	Nymphalidae	Charaxinae	Megisto	cymela	cymela, viola	Nymphalidae	Satyrinae	Megisto	cymela		Little Wood-Satyr	Nymphalidae	Satyrinae	Megisto	cymela			F			F	F
Nymphalidae	Satyrinae	Megisto	rubricata	rubricata, smithorum, cheneyorum	Nymphalidae	Charaxinae	Megisto	rubricata	rubricata, smithorum, cheneyorum	Nymphalidae	Satyrinae	Megisto	rubricata		Red Satyr	Nymphalidae	Satyrinae	Megisto	rubricata			F			F	F
Nymphalidae	Satyrinae	Neominois	ridingsii	minimus, wyomingo, ridingsii, neomexicanus, stretchii, pallidus	Nymphalidae	Charaxinae	Neominois	ridingsii	minimus, wyomingo, ridingsii, curicata, coloalbiterra, neomexicanus, stretchii, pallidus	Nymphalidae	Satyrinae	Neominois	ridingsii		Ridings' Satyr	Nymphalidae	Satyrinae	Neominois	ridingsii	wyomingo*	O&W: [Scott (1998) described “Hipparchia (Neominois) ridingsii wyomingo” as a “new subspecies (or species?)”, and suggested it is genetically isolated from ridingsii; Opler (1999) subsequently treated this as a full species. Additional field observations have shed some light on the situation but many questions remain and the status of wyomingo remains uncertain. The situation is currently under s…	F			F	F
Nymphalidae	Satyrinae	Oeneis	philipi		Nymphalidae	Charaxinae	Oeneis	philipi		Nymphalidae	Satyrinae	Oeneis	rosovi		Early Arctic	Nymphalidae	Satyrinae	Oeneis	philipi		Pelham: Lafontaine (1998), in: Layberry et al., Butterflies Can.: 236, suggested that the North American taxon philipi is a synonym of O. rosovi Kurentsov, 1970, Butterflies Far East USSR: 49, key, figure 42(1), 50, fig. 44(6) ♂ genitalia, 73. However, since there are two syntypes of that taxon extant, and V. Lukhtanov (1989), Vestnik Zool. 1989(2): 33-34, considered them to represent two differe…	F	S		F, S	F	S
Nymphalidae	Satyrinae	Oeneis	polixenes	katahdin, polixenes, subhyalina, beringianus, woodi, yukonensis, brucei	Nymphalidae	Charaxinae	Oeneis	polixenes	katahdin, polixenes, subhyalina, beringianus, woodi, yukonensis, brucei	Nymphalidae	Satyrinae	Oeneis	polixenes		Polixenes Arctic	Nymphalidae	Satyrinae	Oeneis	polixenes			F			F	F
Nymphalidae	Satyrinae	Oeneis	jutta	balder, terraenovae, ascerta, ridingiana, harperi, leussleri, alaskensis, chermocki, reducta, jutta	Nymphalidae	Charaxinae	Oeneis	jutta	balder, terraenovae, ascerta, ridingiana, harperi, leussleri, alaskensis, chermocki, reducta	Nymphalidae	Satyrinae	Oeneis	jutta		Jutta Arctic	Nymphalidae	Satyrinae	Oeneis	jutta			F			F	F
Nymphalidae	Satyrinae	Oeneis	melissa	semidea, melissa, semplei, assimilis, gibsoni, atlinensis, beanii, lucilla	Nymphalidae	Charaxinae	Oeneis	melissa	semidea, melissa, semplei, assimilis, gibsoni, atlinensis, beanii, lucilla	Nymphalidae	Satyrinae	Oeneis	melissa		Melissa Arctic	Nymphalidae	Satyrinae	Oeneis	melissa			F			F	F
Nymphalidae	Satyrinae	Oeneis	alpina	excubitor	Nymphalidae	Charaxinae	Oeneis	alpina	excubitor	Nymphalidae	Satyrinae	Oeneis	alpina		Sentinel Arctic	Nymphalidae	Satyrinae	Oeneis	alpina			F			F	F
Nymphalidae	Satyrinae	Oeneis	bore	taygete, gaspeensis, hanburyi, mckinleyensis, fordi, edwardsi	Nymphalidae	Charaxinae	Oeneis	bore	taygete, gaspeensis, hanburyi, mckinleyensis, fordi, edwardsi	Nymphalidae	Satyrinae	Oeneis	taygete		White-veined Arctic	Nymphalidae	Satyrinae	Oeneis	bore			F	P		F,P	F	P
Nymphalidae	Satyrinae	Oeneis	chryxus	chryxus, ivallda, strigulosa, calais, caryi, altacordillera, valerata, stanislaus	Nymphalidae	Charaxinae	Oeneis	chryxus	chryxus, ivallda, strigulosa, calais, caryi, altacordillera, socorro, valerata, stanislaus	Nymphalidae	Satyrinae	Oeneis	chryxus	chryxus (Brown' Chryxus Arctic), ivallda ('California' Chryxus Arctic)	Chryxus Arctic	Nymphalidae	Satyrinae	Oeneis	chryxus	ivallda	O&W: [Includes ivallda (Mead, 1878), following Porter & Shapiro (1991).]	F			F	F
Nymphalidae	Satyrinae	Oeneis	alberta	alberta, ojibwe, oslari, capulinensis, daura	Nymphalidae	Charaxinae	Oeneis	alberta	alberta, ojibwe, oslari, capulinensis, daura	Nymphalidae	Satyrinae	Oeneis	alberta		Alberta Arctic	Nymphalidae	Satyrinae	Oeneis	alberta			F			F	F
Nymphalidae	Satyrinae	Oeneis	nevadensis	gigas, nevadensis, iduna	Nymphalidae	Charaxinae	Oeneis	nevadensis	gigas, nevadensis, iduna	Nymphalidae	Satyrinae	Oeneis	nevadensis		Great Arctic	Nymphalidae	Satyrinae	Oeneis	nevadensis			F			F	F
Nymphalidae	Satyrinae	Oeneis	macounii		Nymphalidae	Charaxinae	Oeneis	macounii		Nymphalidae	Satyrinae	Oeneis	macounii		Macoun's Arctic	Nymphalidae	Satyrinae	Oeneis	macounii			F			F	F
Nymphalidae	Satyrinae	Oeneis	uhleri	uhleri, reinthali, varuna, cairnesi, nahanni	Nymphalidae	Charaxinae	Oeneis	uhleri	uhleri, reinthali, varuna, cairnesi, nahanni	Nymphalidae	Satyrinae	Oeneis	uhleri		Uhler's Arctic	Nymphalidae	Satyrinae	Oeneis	uhleri			F			F	F
Nymphalidae	Satyrinae	Neonympha	areolatus		Nymphalidae	Charaxinae	Neonympha	areolatus		Nymphalidae	Satyrinae	Neonympha	areolata		Georgia Satyr	Nymphalidae	Satyrinae	Neonympha	areolatus		Spelling	F	L		F, L	F	L
Nymphalidae	Satyrinae	Neonympha	helicta	septentrionalis, helicta, dadeensis	Nymphalidae	Charaxinae	Neonympha	helicta	septentrionalis, helicta, dadeensis	Nymphalidae	Satyrinae	Neonympha	areolata		Georgia Satyr	Nymphalidae	Satyrinae	Neonympha	helicta		Pelham: The separation of N. helicta from N. areolata was discussed by Gatrelle (1999), Tax. Rept. Int. Lepid. Surv. 1(8): 1-8, but requires additional corroboration. O&W: [Species status recently proposed by Gatrelle (1999); however, further research on this group is needed to clarify overall distributions and confirm the status of helicta.] NABA doesn't list, so assume it is using older interpr…	F	S		F, S	F	S
Nymphalidae	Satyrinae	Neonympha	mitchellii	mitchellii, francisci	Nymphalidae	Charaxinae	Neonympha	mitchellii	mitchellii, francisci	Nymphalidae	Satyrinae	Neonympha	mitchellii		Mitchell's Satyr	Nymphalidae	Satyrinae	Neonympha	mitchellii			F			F	F
Nymphalidae	Satyrinae	Paramacera	xicaque	allyni	Nymphalidae	Charaxinae	Paramacera	xicaque	allyni	Nymphalidae	Satyrinae	Paramacera	allyni		Pine Satyr	Nymphalidae	Satyrinae	Paramacera	xicaque	allyni	O&W: [Tentatively includes allyni L. Miller, 1972*, following Scott (1986), but see Miller (1972). Further study is needed.] Pelham: Original Combination: Paramacera allyni	F	P		F, P	F	P
Nymphalidae	Satyrinae	Lethe	appalachia	appalachia, leeuwi	Nymphalidae	Charaxinae	Lethe	appalachia	appalachia, leeuwi	Nymphalidae	Satyrinae	Satyrodes	appalachia		Appalachian Brown	Nymphalidae	Satyrinae	Satyrodes	appalachia			F	G	G	F, G	F, G
Nymphalidae	Satyrinae	Lethe	eurydice	eurydice, fumosus	Nymphalidae	Charaxinae	Lethe	eurydice	eurydice, fumosus	Nymphalidae	Satyrinae	Satyrodes	eurydice		Eyed Brown	Nymphalidae	Satyrinae	Satyrodes	eurydice			F	G	G	F, G	F, G
Lycaenidae	Polyommatinae	Plebejus	glandon	cassiope	Lycaenidae	Polyommatinae	Agriades	glandon	cassiope	Lycaenidae	Polyommatinae	Agriades	cassiope		Heather Blue	Lycaenidae	Lycaeninae	Plebejus	cassiope			G	G, P	P, F	P	F, G, P	F, G
Lycaenidae	Polyommatinae	Plebejus	glandon	rustica, franklinii, labrador, lacustris, bryanti, megalo, kelsoni, punctatus	Lycaenidae	Polyommatinae	Agriades	glandon	rustica, franklinii, labrador, lacustris, bryanti, megalo, kelsoni, punctatus	Lycaenidae	Polyommatinae	Agriades	glandon	glandon, franklinii	Arctic Blue	Lycaenidae	Lycaeninae	Plebejus	glandon			G	G	F		F, G	F, G
Lycaenidae	Polyommatinae	Plebejus	podarce	podarce, cilia, klamathensis	Lycaenidae	Polyommatinae	Agriades	podarce	podarce, cilia, klamathensis	Lycaenidae	Polyommatinae	Agriades	glandon	podarce	Sierra' Arctic Blue	Lycaenidae	Lycaeninae	Plebejus	podarce			G	G, P	F	P	F, G	F, G, P
Lycaenidae	Polyommatinae	Brephidium	exilis	exilis	Lycaenidae	Polyommatinae	Brephidium	exilis	exilis	Lycaenidae	Polyommatinae	Brephidium	exile		Western Pygmy-Blue	Lycaenidae	Lycaeninae	Brephidium	exilis				L	F	L	F	L
Lycaenidae	Polyommatinae	Brephidium	exilis	isophthalma	Lycaenidae	Polyommatinae	Brephidium	exilis	isophthalma	Lycaenidae	Polyommatinae	Brephidium	isophthalma		Eastern Pygmy-Blue	Lycaenidae	Lycaeninae	Brephidium	exilis	isophthalma	Pelham notes indicate he incls isophthalma as subsp of B. exilis as per Opler and A. Warren (2002) who "discussed the relationship between B. exilis and B. pseudofea, and the status of the taxon isophthalma (Herrich-Schäffer, 1862) as a subspecies of B. exilis." O&W unclear: treat as a subspecies of B. exilis as per Brown & Heineman (1972), Riley (1975) and Smith et al. (1994) ?		P	F	P	F	F, P
Lycaenidae	Polyommatinae	Brephidium	pseudofea		Lycaenidae	Polyommatinae	Brephidium	pseudofea					N(?)			Lycaenidae	Lycaeninae	Brephidium	pseudofea		NABA doesn't mention pseudofea. May consider conspecific with "exile"?		N(?)	F	N(?)	F	N(?)
Lycaenidae	Polyommatinae	Celastrina	ladon		Lycaenidae	Polyommatinae	Celastrina	ladon		Lycaenidae	Polyommatinae	Celastrina	ladon	ladon, violacea, argentata, "ssp."	Spring Azure ('Spring' spring azure, 'Edward's' spring azure, 'Manitoba' spring azure, 'Cherry Gall' Spring Azure)	Lycaenidae	Lycaeninae	Celastrina	ladon					F		F	F
Lycaenidae	Polyommatinae	Celastrina	neglecta		Lycaenidae	Polyommatinae	Celastrina	neglecta		Lycaenidae	Polyommatinae	Celastrina	ladon	neglecta	Summer' Spring Azure	Lycaenidae	Lycaeninae	Celastrina	neglecta				P	F	P	F	F, P
Lycaenidae	Polyommatinae	Celastrina	humulus		Lycaenidae	Polyommatinae	Celastrina	humulus		Lycaenidae	Polyommatinae	Celastrina	ladon	humulus	Hops' Spring Azure	Lycaenidae	Lycaeninae	Celastrina	humulus				P	F	P	F	F, P
Lycaenidae	Polyommatinae	Celastrina	echo	echo, nigrescens, sidara, cinerea	Lycaenidae	Polyommatinae	Celastrina	echo	echo, nigrescens, sidara, cinerea	Lycaenidae	Polyommatinae	Celastrina	ladon		Spring Azure	Lycaenidae	Lycaeninae	Celastrina	echo		NABA doesn't mention echo. We presume synonymous with ladon or included in ladon.		S	F	S	F	S, F
Lycaenidae	Polyommatinae	Celastrina	lucia	lucia, lumarco	Lycaenidae	Polyommatinae	Celastrina	lucia	lucia, lumarco	Lycaenidae	Polyommatinae	Celastrina	ladon			Lycaenidae	Lycaeninae	Celastrina	lucia		Assume from NABA's text that they include lucia as population of C. ladon, so not listed: "Wright and Pavulaan (1999) [described C. idella} as a new species of azure feeding on hollies, Ilex. They stated that 3-6% of individuals in southern New Jersey are near 'lucia'"		S	F	S	F	F, S
Lycaenidae	Polyommatinae	Celastrina	serotina		Lycaenidae	Polyommatinae	Celastrina	serotina					N(?)						N(?)		Described as new species in 2005 (Pavulaan, H. and Wright, D.M., 2005. Celastrina serotina (Lycaenidae: Polyommatinae): a new butterfly species from the northeastern United States and eastern Canada. Taxonomic Report, 6, pp.1-19 http://lepsurvey.carolinanature.com/ttr/ttr-6-6.pdf.) Paper indicates that they are morphologically similar to C. neglectamajor, C. idella and C. neglecta, though sympatr…		N(?)	N(?)	N(?)	N(?)
Lycaenidae	Polyommatinae	Celastrina	idella		Lycaenidae	Polyommatinae	Celastrina	idella		Lycaenidae	Polyommatinae	Celastrina	ladon	idella	'Atlantic' Spring Azure	Lycaenidae	Lycaeninae	Celastrina	idella				P	F	P	F	F, P
Lycaenidae	Polyommatinae	Celastrina	neglectamajor		Lycaenidae	Polyommatinae	Celastrina	neglectamajor		Lycaenidae	Polyommatinae	Celastrina	neglectamajor		Appalachian Azure	Lycaenidae	Lycaeninae	Celastrina	neglectamajor					F		F	F
Lycaenidae	Polyommatinae	Celastrina	nigra		Lycaenidae	Polyommatinae	Celastrina	nigra		Lycaenidae	Polyommatinae	Celastrina	nigra		Dusky Azure	Lycaenidae	Lycaeninae	Celastrina	nigra					F		F	F
Lycaenidae	Polyommatinae	Euphilotes	battoides	battoides, mazourka, panamintensis, allyni, argocyanea, vernalis, fusimaculata, anasazi	Lycaenidae	Polyommatinae	Euphilotes	battoides	battoides, mazourka, panamintensis, allyni, argocyanea, vernalis, fusimaculata, anasazi	Lycaenidae	Polyommatinae	Euphilotes	battoides	allyni ('El Segundo' Square-spotted Blue)	Square-spotted Blue	Lycaenidae	Lycaeninae	Euphilotes	battoides					F		F	F
Lycaenidae	Polyommatinae	Euphilotes	centralis	centralis, hadrochilus	Lycaenidae	Polyommatinae	Euphilotes	centralis	centralis, hadrochilus	Lycaenidae	Polyommatinae	Euphilotes	battoides	centralis	Square-spotted Blue	Lycaenidae	Lycaeninae	Euphilotes	battoides	centralis	O&W notes: "[E. battoides] Tentatively includes, among others, centralis (Barnes & McDunnough, 1917)"		P	F	P	F, P	F
Lycaenidae	Polyommatinae	Euphilotes	bernardino	bernardino, inyomontana, martini, minuta	Lycaenidae	Polyommatinae	Euphilotes	bernardino	bernardino, inyomontana, martini, minuta	Lycaenidae	Polyommatinae	Euphilotes	battoides	bernardino	Bernardino' Square-spotted Blue	Lycaenidae	Lycaeninae	Euphilotes	bernardino				P	F	P	F	F, P
Lycaenidae	Polyommatinae	Euphilotes	baueri	baueri, orientis	Lycaenidae	Polyommatinae	Euphilotes	baueri	baueri, orientis	Lycaenidae	Polyommatinae	Euphilotes	battoides	baueri	Square-spotted Blue	Lycaenidae	Lycaeninae	Euphilotes	baueri				P	F	P	F	F, P
Lycaenidae	Polyommatinae	Euphilotes	glaucon	intermedia	Lycaenidae	Polyommatinae	Euphilotes	glaucon	intermedia	Lycaenidae	Polyommatinae	Euphilotes	battoides	intermedia	Square-spotted Blue	Lycaenidae	Lycaeninae	Euphilotes	intermedia				S	F	S	F, P	F, P
Lycaenidae	Polyommatinae	Euphilotes	ellisii	avawatz, basinensis, ellisii, euromojavensis	Lycaenidae	Polyommatinae	Euphilotes	ellisii	avawatz, basinensis, euromojavensis	Lycaenidae	Polyommatinae	Euphilotes	battoides	ellisi	Square-spotted Blue	Lycaenidae	Lycaeninae	Euphilotes	ellisi				L, P	F, L	L, P	F, L	F, P
Lycaenidae	Polyommatinae	Euphilotes	glaucon	comstocki, glaucon, australoglaucon, oregonensis	Lycaenidae	Polyommatinae	Euphilotes	glaucon	comstocki, glaucon, australoglaucon, oregonensis	Lycaenidae	Polyommatinae	Euphilotes	battoides	glaucon					N(?)		NABA states glaucon is "another battoides subspecies"; O&W doesn't mention		P	N(?)	P	N(?)	N(?)
Lycaenidae	Polyommatinae	Euphilotes	enoptes	arenacola, aridorum, bayensis, cryptorufes, dammersi, enoptes, langstoni, opacapulla, primavera, smithi, tildeni	Lycaenidae	Polyommatinae	Euphilotes	enoptes	arenacola, aridorum, bayensis, cryptorufes, dammersi, enoptes, langstoni, opacapulla, primavera, smithi, tildeni,	Lycaenidae	Polyommatinae	Euphilotes	enoptes	dammersi (Dammer's' Dotted Blue)	Dotted Blue	Lycaenidae	Lycaeninae	Euphilotes	enoptes					F		F	F
Lycaenidae	Polyommatinae	Euphilotes	mojave	mojave, virginensis	Lycaenidae	Polyommatinae	Euphilotes	mojave	mojave, virginensis	Lycaenidae	Polyommatinae	Euphilotes	enoptes	mojave	'Mojave' Dotted Blue	Lycaenidae	Lycaeninae	Euphilotes	mojave				P	F	P	F	F, P
Lycaenidae	Polyommatinae	Euphilotes	ancilla	ancilla, giulianii, gilvatunica, shieldsi, purpura, pseudointermedia	Lycaenidae	Polyommatinae	Euphilotes	ancilla	barnesi, ancilla, giulianii, gilvatunica, shieldsi, purpura, cryptica, pseudointermedia	Lycaenidae	Polyommatinae	Euphilotes	enoptes	ancilla	Dotted Blue	Lycaenidae	Lycaeninae	Euphilotes	ancilla				P	F	P	F	F, P
Lycaenidae	Polyommatinae	Euphilotes	columbiae		Lycaenidae	Polyommatinae	Euphilotes	columbiae		Lycaenidae	Polyommatinae	Euphilotes	enoptes	columbiae	Dotted Blue	Lycaenidae	Lycaeninae	Euphilotes	enoptes	columbiae	Caitlin LaBar (web): This species was originally thought to be a subspecies of Dotted Blue (E. enoptes), but analysis by Andrew Warren (Butterflies of Oregon, 2005) discovered that it is a separate species -- described as such Warren 2005. (http://northwestbutterflies.blogspot.com/2015/11/species-profile-euphilotes-buckwheat.html). Assume O&W (2003) interprets as enoptes (O&W2003 written before W…		P	F, P	P	F, P	F
Lycaenidae	Polyommatinae	Euphilotes	rita	coloradensis, rita	Lycaenidae	Polyommatinae	Euphilotes	rita	coloradensis, rita	Lycaenidae	Polyommatinae	Euphilotes	rita		Rita Blue	Lycaenidae	Lycaeninae	Euphilotes	rita					F		F	F
Lycaenidae	Polyommatinae	Euphilotes	pallescens	arenamontana, calneva, confusa, elvirae, emmeli, mattonii, pallescens, ricei	Lycaenidae	Polyommatinae	Euphilotes	pallescens	arenamontana, calneva, confusa, elvirae, emmeli, mattonii, pallescens, ricei	Lycaenidae	Polyommatinae	Euphilotes	rita	pallescens	'Pale' Rita Blue	Lycaenidae	Lycaeninae	Euphilotes	pallescens				P	F	P	F	F, P
Lycaenidae	Polyommatinae	Euphilotes	spaldingi	spaldingi, pinjuna	Lycaenidae	Polyommatinae	Euphilotes	spaldingi	spaldingi, pinjuna	Lycaenidae	Polyommatinae	Euphilotes	spaldingi		Spalding's Blue	Lycaenidae	Lycaeninae	Euphilotes	spaldingi					F		F	F
			N(r)		Lycaenidae	Polyommatinae	Euphilotes	stanfordorum					N(r)						N(r)		New species from Colorado. Described Opler & Warren, 2009. In M. Fisher, Butterflies of Colorado Part 4, Riodinidae and Lycaenidae. What was it considered before?	R(n)			R(n)	R(n)
Lycaenidae	Polyommatinae	Cupido	amyntula	albrighti, amyntula, herri, maritima, montanorum, nesiotes, valeriae	Lycaenidae	Polyommatinae	Cupido	amyntula	albrighti, amyntula, herri, maritima, montanorum, nesiotes, valeriae	Lycaenidae	Polyommatinae	Everes	amyntula		Western Tailed-Blue	Lycaenidae	Lycaeninae	Cupido	amyntula				G	F	G	F	F, G
Lycaenidae	Polyommatinae	Cupido	comyntas	comyntas, sissona, texana	Lycaenidae	Polyommatinae	Cupido	comyntas	comyntas, sissona, texana	Lycaenidae	Polyommatinae	Everes	comyntas		Eastern Tailed-Blue	Lycaenidae	Lycaeninae	Cupido	comyntas				G	F	G	F	F, G
Lycaenidae	Polyommatinae	Glaucopsyche	lygdamus	lygdamus, mildredae, couperi, afra, jacki, oro, minipunctum, deserticola, australis, palosverdesensis, sabulosa, pseudoxerces, incognitus, orcus, columbia, arizonensis	Lycaenidae	Polyommatinae	Glaucopsyche	lygdamus	lygdamus, mildredae, couperi, afra, jacki, oro, erico, ruidoso, minipunctum, deserticola, australis, palosverdesensis, sabulosa, pseudoxerces, incognitus, orcus, columbia	Lycaenidae	Polyommatinae	Glaucopsyche	lygdamus		Silvery Blue	Lycaenidae	Lycaeninae	Glaucopsyche	lygdamus					F		F	F
Lycaenidae	Polyommatinae	Glaucopsyche	lygdamus	xerces	Lycaenidae	Polyommatinae	Glaucopsyche	lygdamus	xerces	Lycaenidae	Polyommatinae	Glaucopsyche	xerces		Xerces Blue	Lycaenidae	Lycaeninae	Glaucopsyche	xerces		O&W notes: “The extinct G. xerces was suggested to be a subspecies of G. lygdamus by Scott 1986”; thus assume OW considers at species level.		P	F, P	P	F, P	F
Lycaenidae	Polyommatinae	Glaucopsyche	piasus	daunia, excubita, gabrielina, nevada, piasus, sagittigera, toxeuma, umbrosa	Lycaenidae	Polyommatinae	Glaucopsyche	piasus	daunia, excubita, gabrielina, nevada, piasus, sagittigera, toxeuma, umbrosa	Lycaenidae	Polyommatinae	Glaucopsyche	piasus		Arrowhead Blue	Lycaenidae	Lycaeninae	Glaucopsyche	piasus					F		F	F
Lycaenidae	Polyommatinae	Cyclargus	ammon		Lycaenidae	Polyommatinae	Cyclargus	ammon		Lycaenidae	Polyommatinae	Hemiargus	ammon		Nickerbean Blue	Lycaenidae	Lycaeninae	Cyclargus	ammon				G	F	G	F	F, G
Lycaenidae	Polyommatinae	Hemiargus	ceraunus	antibubastus, astenidas, gyas	Lycaenidae	Polyommatinae	Hemiargus	ceraunus	antibubastus, astenidas, gyas	Lycaenidae	Polyommatinae	Hemiargus	ceraunus		Ceraunus Blue	Lycaenidae	Lycaeninae	Hemiargus	ceraunus					F		F	F
Lycaenidae	Polyommatinae	Echinargus	isola		Lycaenidae	Polyommatinae	Echinargus	isola		Lycaenidae	Polyommatinae	Hemiargus	isola		Reakirt's Blue	Lycaenidae	Lycaeninae	Echinargus	isola				G	F	G	F	F, G
Lycaenidae	Polyommatinae	Cyclargus	thomasi	bethunebakeri	Lycaenidae	Polyommatinae	Cyclargus	thomasi	bethunebakeri	Lycaenidae	Polyommatinae	Hemiargus	thomasi		Miami Blue	Lycaenidae	Lycaeninae	Cyclargus	thomasi				G	F	G	F	F, G
Lycaenidae	Polyommatinae	Lampides	boeticus		Lycaenidae	Polyommatinae	Lampides	boeticus		Lycaenidae	Polyommatinae	Lampides	boeticus		Pea Blue	Lycaenidae	Lycaeninae	Lampides	boeticus					F		F	F
Lycaenidae	Polyommatinae	Leptotes	cassius	theonus, cassidula	Lycaenidae	Polyommatinae	Leptotes	cassius	theonus, cassidula	Lycaenidae	Polyommatinae	Leptotes	cassius		Cassius Blue	Lycaenidae	Lycaeninae	Leptotes	cassius					F		F	F
Lycaenidae	Polyommatinae	Leptotes	marina		Lycaenidae	Polyommatinae	Leptotes	marina		Lycaenidae	Polyommatinae	Leptotes	marina		Marine Blue	Lycaenidae	Lycaeninae	Leptotes	marina					F		F	F
Lycaenidae	Polyommatinae	Plebejus	idas	alaskensis, aster, atrapraetextus, empetri, ferniensis, longinus, nabokovi, scudderii, sublivens	Lycaenidae	Polyommatinae	Plebejus	idas	alaskensis, aster, atrapraetextus, empetri, ferniensis, longinus, nabokovi, scudderii, sublivens	Lycaenidae	Polyommatinae	Lycaeides	idas		Northern Blue	Lycaenidae	Lycaeninae	Plebejus	idas				G	F	G	F	F, G
Lycaenidae	Polyommatinae	Plebejus	melissa	alateres, annetta, inyoensis, melissa, paradoxa, pseudosamuelis	Lycaenidae	Polyommatinae	Plebejus	melissa	alateres, annetta, inyoensis, melissa, paradoxa, pseudosamuelis	Lycaenidae	Polyommatinae	Lycaeides	melissa		Melissa Blue	Lycaenidae	Lycaeninae	Plebejus	melissa				G	F	G	F	F, G
Lycaenidae	Polyommatinae	Plebejus	melissa	samuelis	Lycaenidae	Polyommatinae	Plebejus	samuelis		Lycaenidae	Polyommatinae	Lycaeides	melissa	samuelis	Karner' Melissa Blue	Lycaenidae	Lycaeninae	Plebejus	melissa	samuelis pop'n	Pelham notes that "samuelis population" included in P. melissa O&W says: [See Lane & Weller (1994) for details on the taxonomic status of P. melissa populations, including samuelis (Nabokov, 1944).] Assume = ssp of P.melissa	P	G	F	G, P	F, P	F, G
Lycaenidae	Polyommatinae	Plebejus	fridayi		Lycaenidae	Polyommatinae	Plebejus	fridayi		Lycaenidae	Polyommatinae	Lycaeides	melissa	fridayi		Lycaenidae	Lycaeninae	Plebejus	melissa	fridayi	Pelham states "original combination = Plebeius melissa fridayi" Kenneth Davenport (web): "Friday's Blue (Plebejus fridayi or P. melissa fridayi to NABA): I found 4 males at Warren Creek, some were the size of Anna Blues but with fridayi field marks below. This might show Shapiro and others were correct that fridayi arose from hybridization between melissa and anna. See my Yosemite publication for…		G, P	F, P	G, P	F, P	F, G
Lycaenidae	Polyommatinae	Philotes	sonorensis	sonorensis, extinctis	Lycaenidae	Polyommatinae	Philotes	sonorensis	sonorensis, extinctis	Lycaenidae	Polyommatinae	Philotes	sonorensis		Sonoran Blue	Lycaenidae	Lycaeninae	Philotes	sonorensis					F		F	F
Lycaenidae	Polyommatinae	Philotiella	speciosa	speciosa, septentrionalis, bohartorum, purisima	Lycaenidae	Polyommatinae	Philotiella	speciosa	speciosa, septentrionalis, bohartorum, purisima	Lycaenidae	Polyommatinae	Philotiella	speciosa		Small Blue	Lycaenidae	Lycaeninae	Philotiella	speciosa					F		F	F
Lycaenidae	Polyommatinae	Philotiella	leona		Lycaenidae	Polyommatinae	Philotiella	leona		Lycaenidae	Polyommatinae	Philotiella	speciosa	leona	Small Blue	Lycaenidae	Lycaeninae	Philotiella	leona				P	F	P	F	F, P
Lycaenidae	Polyommatinae	Plebejus	lupini	alpicola, argentata, chlorina, dedeckera, goodpasturei, lupini, lutzi, monticola, spangelatus, texanus	Lycaenidae	Polyommatinae	Icaricia	lupini	alpicola, argentata, chlorina, dedeckera, goodpasturei, lupini, lutzi, monticola, spangelatus, texanus	Lycaenidae	Polyommatinae	Plebejus	lupini		Lupine Blue	Lycaenidae	Lycaeninae	Plebejus	lupini			G		F	G	F, G	F
Lycaenidae	Polyommatinae	Plebejus	lupini	cotundra	Lycaenidae	Polyommatinae	Icaricia	cotundra		Lycaenidae	Polyommatinae	Plebejus	lupini	cotundra		Lycaenidae	Lycaeninae	Plebejus	lupini	cotundra	Pelham indicates original name = Plebejus lupini; WE assume NABA, O&W include in P. lupini.	G, P		F	G, P	F, G, P	F
Lycaenidae	Polyommatinae	Plebejus	acmon		Lycaenidae	Polyommatinae	Icaricia	acmon		Lycaenidae	Polyommatinae	Plebejus	acmon		Acmon Blue	Lycaenidae	Lycaeninae	Plebejus	acmon			G		F	G	F, G	F
Lycaenidae	Polyommatinae	Plebejus	anna	anna, azureus, benwarner, lotis, ricei, vancouverensis	Lycaenidae	Polyommatinae	Plebejus	anna	anna, azureus, benwarner, lotis, ricei, vancouverensis	Lycaenidae	Polyommatinae	Lycaeides	idas	anna		Lycaenidae	Lycaeninae	Plebejus	anna		NABA doesn't include this species on its checklist. Probably considered a subspecies of P. idas		P	F	P	F	F, P
Lycaenidae	Polyommatinae	Plebejus	emigdionis		Lycaenidae	Polyommatinae	Plebulina	emigdionis		Lycaenidae	Polyommatinae	Plebejus	emigdionis		San Emigdio Blue	Lycaenidae	Lycaeninae	Plebejus	emigdionis			G		F	G	F, G	F
Lycaenidae	Polyommatinae	Plebejus	icarioides	albihalos, argusmontana, atascadero, austinorum, blackmorei, buchholzi, eosierra, evius, fenderi, fulla, helios, icarioides, inyo, lycea, montis, moroensis, panamintina, parapheres, pardalis, pembina, pheres, santana, missionensis	Lycaenidae	Polyommatinae	Icaricia	icarioides	albihalos, argusmontana, atascadero, austinorum, blackmorei, buchholzi, eosierra, evius, fenderi, fulla, helios, icarioides, inyo, lycea, montis, moroensis, nigrafem, panamintina, parapheres, pardalis, pembina, pheres, sacre, santana, missionensis	Lycaenidae	Polyommatinae	Plebejus	icarioides	missionensis ('Mission' Boisduval's Blue)	Boisduval's Blue	Lycaenidae	Lycaeninae	Plebejus	icarioides			G		F	G	F, G	F
Lycaenidae	Polyommatinae	Plebejus	neurona		Lycaenidae	Polyommatinae	Icaricia	neurona		Lycaenidae	Polyommatinae	Plebejus	neurona		Veined Blue	Lycaenidae	Lycaeninae	Plebejus	neurona			G		F	G	F, G	F
Lycaenidae	Polyommatinae	Plebejus	saepiolus	aehaja, albomontanus, amica, aureolus, gertschi, hilda, insulanus, littoralis, maculosus, rufescens, saepiolus, whitmeri	Lycaenidae	Polyommatinae	Icaricia	saepiolus	aehaja, albomontanus, amica, aureolus, gertschi, hilda, insulanus, littoralis, maculosus, rufescens, saepiolus, whitmeri	Lycaenidae	Polyommatinae	Plebejus	saepiolus		Greenish Blue	Lycaenidae	Lycaeninae	Plebejus	saepiolus			G		F	G	F, G	F
Lycaenidae	Polyommatinae	Plebejus	shasta	calchas, charlestonensis, minnehaha, pallidissima, pitkinensis, platazul, shasta	Lycaenidae	Polyommatinae	Icaricia	shasta	calchas, charlestonensis, minnehaha, pallidissima, pitkinensis, shasta	Lycaenidae	Polyommatinae	Plebejus	shasta		Shasta Blue	Lycaenidae	Lycaeninae	Plebejus	shasta			G		F	G	F, G	F
Lycaenidae	Polyommatinae	Plebejus	optilete	yukona	Lycaenidae	Polyommatinae	Agriades	optilete	yukona	Lycaenidae	Polyommatinae	Vacciniina	optilete		Cranberry Blue	Lycaenidae	Lycaeninae	Plebejus	optilete			G	G	F	G	F, G	F, G
			N(r)		Lycaenidae	Polyommatinae	Polyommatus	icarus	icarus				N(r)						N(r)		Common European/Asian species. Pelham notes: "reported from Canada by P. Hall (2007), News Lepid. Soc. 49(4):111, 117."	N(r)			N(r)	N(r)
Lycaenidae	Polyommatinae	Udara	blackburni		Lycaenidae	Polyommatinae	Udara	blackburni		Lycaenidae	Polyommatinae	Vaga	blackburni		Hawaiian Blue	Lycaenidae	Lycaeninae	Udara	blackburni				G	F	G	F	F, G
Lycaenidae	Polyommatinae	Zizula	cyna		Lycaenidae	Polyommatinae	Zizula	cyna		Lycaenidae	Polyommatinae	Zizula	cyna		Cyna Blue	Lycaenidae	Lycaeninae	Zizula	cyna					F		F	F
			N(r)		Lycaenidae	Polyommatinae	Zizina	otis	otis				N(r)						N(r)		Pelham notes: This species was reported for Hawaii by Snyder et al. (2008). It is a south Asian species. http://archives.starbulletin.com/content/20081014_New_butterfly_is_discovered_in_Waikiki_lot	N(r)			N(r)	N(r)
Lycaenidae	Lycaeninae	Lycaena	dospassosi		Lycaenidae	Lycaeninae	Lycaena	dospassosi		Lycaenidae	Lycaeninae	Lycaena	dorcas	dospassosi	Salt Marsh' Dorcas Copper	Lycaenidae	Lycaeninae	Lycaena	dospassosi				P	F	P	F	F, P
Lycaenidae	Lycaeninae	Lycaena	rubidus	ferrisi	Lycaenidae	Lycaeninae	Lycaena	rubidus	ferrisi	Lycaenidae	Lycaeninae	Lycaena	rubidus	ferrisi	'White Mountains' Ruddy Copper	Lycaenidae	Lycaeninae	Lycaena	ferrisi					P		P	F, P
Lycaenidae	Theclinae	Allosmaitia	strophius		Lycaenidae	Theclinae	Allosmaitia	strophius		Lycaenidae	Theclinae	Allosmaitia	strophius		Strophius Hairstreak	Lycaenidae	Lycaeninae	Allosmaitia	strophius					F		F	F
Lycaenidae	Theclinae	Arawacus	jada		Lycaenidae	Theclinae	Arawacus	jada		Lycaenidae	Theclinae	Arawacus	jada		Creamy Stripe-streak	Lycaenidae	Lycaeninae	Arawacus	jada					F		F	F
Lycaenidae	Theclinae	Atlides	halesus	halesus, corcorani	Lycaenidae	Theclinae	Atlides	halesus	halesus, corcorani	Lycaenidae	Theclinae	Atlides	halesus		Great Purple Hairstreak	Lycaenidae	Lycaeninae	Atlides	halesus					F		F	F
Lycaenidae	Theclinae	Callophrys	augustinus	annetteae, augustinus, concava, croesioides, helenae, iroides	Lycaenidae	Theclinae	Callophrys	augustinus	annetteae, augustinus, concava, croesioides, helenae, iroides	Lycaenidae	Theclinae	Callophrys	augustinus		Brown Elfin	Lycaenidae	Lycaeninae	Callophrys	augustinus		Newfoundland north and west through northern United States and the prairie provinces to Alaska; south in Appalachians to northern Georgia and northern Alabama; south through western mountains to northern Baja California. Does not occur on the plains or in the Midwest.			F		F	F
Lycaenidae	Theclinae	Callophrys	affinis	affinis	Lycaenidae	Theclinae	Callophrys	affinis	affinis	Lycaenidae	Theclinae	Callophrys	dumetorum	affinis	Immaculate' Bramble Hairstreak	Lycaenidae	Lycaeninae	Callophrys	affinis		O&W: C. affinis tentatively includes apama (W.H. Edwards, 1882) and homoperplexa Barnes & Benjamin, 1923, in accord with the treatment of Scott (1986); however, further elaboration on the relationship between affinis and homoperplexa is very badly needed.		S	F	S	F	S
Lycaenidae	Theclinae	Callophrys	affinis	apama	Lycaenidae	Theclinae	Callophrys	affinis	apama	Lycaenidae	Theclinae	Callophrys	dumetorum	apama	Canyon' Bramble Hairstreak	Lycaenidae	Lycaeninae	Callophrys	affinis	apama	O&W: C. affinis tentatively includes apama (W.H. Edwards, 1882) and homoperplexa Barnes & Benjamin, 1923, in accord with the treatment of Scott (1986); however, further elaboration on the relationship between affinis and homoperplexa is very badly needed. (Not counted as deviation because at subspecies level for all base lists)
Lycaenidae	Theclinae	Callophrys	affinis	washingtonia, homoperplexa, albipalpis	Lycaenidae	Theclinae	Callophrys	affinis	washingtonia, homoperplexa, albipalpis	Lycaenidae	Theclinae	Callophrys	dumetorum		Bramble Hairstreak	Lycaenidae	Lycaeninae	Callophrys	affinis	homoperplexa	O&W: C. affinis tentatively includes apama (W.H. Edwards, 1882) and homoperplexa Barnes & Benjamin, 1923, in accord with the treatment of Scott (1986); however, further elaboration on the relationship between affinis and homoperplexa is very badly needed. (Not counted as deviation because at subspecies level for all base lists)
Lycaenidae	Theclinae	Callophrys	dumetorum		Lycaenidae	Theclinae	Callophrys	dumetorum		Lycaenidae	Theclinae	Callophrys	dumetorum		Bramble Hairstreak	Lycaenidae	Lycaeninae	Callophrys	dumetorum					F		F	F
Lycaenidae	Theclinae	Callophrys	dumetorum	dumetorum	Lycaenidae	Theclinae	Callophrys	dumetorum	dumetorum	Lycaenidae	Theclinae	Callophrys	dumetorum	dumetorum (Bramble' Bramble Hairstreak)	Bramble Hairstreak	Lycaenidae	Lycaeninae	Callophrys	dumetorum		O&W: [Previously known as C. viridis W.H. Edwards, 1862, a synonym with the same type locality (Emmel et al. (1998a).] Scott considers viridis synonymous with dumetorum			F		F	F
Lycaenidae	Theclinae	Callophrys	perplexa	perplexa, superperplexa, oregonensis	Lycaenidae	Theclinae	Callophrys	dumetorum	perplexa, superperplexa, oregonensis	Lycaenidae	Theclinae	Callophrys	dumetorum	perplexa		Lycaenidae	Lycaeninae	Callophrys	perplexa		O&W: tentatively includes homoperplexa in affinis (though indicates affinis/homoperplexa relationship not clear). Assume O&W also includes washingtonia and albipalpus in affinis. NABA specifically spelled out subspecies apama and affinis on list. However, we don't know if NABA recognizes any other subspecies	P	P	F		F, P	F, P
			N(n)		Lycaenidae	Theclinae	Callophrys	viridis		Lycaenidae	Theclinae	Callophrys	dumetorum	viridis	Coastal' Bramble Hairstreak	Lycaenidae	Lycaeninae	Callophrys	dumetorum		No Match For ITIS -maybe considers it Callophrys dumetorum as does Scott? O&W: [Previously known as C. viridis W.H. Edwards, 1862, a synonym with the same type locality (Emmel et al. (1998a).] (ITIS too?)	N(n)	N(n)	N(n)	P	F, S	F
Lycaenidae	Theclinae	Callophrys	eryphon	eryphon, fusca, pallescens, purpurascens, sheltonensis	Lycaenidae	Theclinae	Callophrys	eryphon	eryphon, fusca, pallescens, purpurascens, sheltonensis	Lycaenidae	Theclinae	Callophrys	eryphon		Western Pine Elfin	Lycaenidae	Lycaeninae	Callophrys	eryphon					F		F	F
Lycaenidae	Theclinae	Callophrys	fotis	fotis, mojavensis	Lycaenidae	Theclinae	Callophrys	fotis	fotis, mojavensis	Lycaenidae	Theclinae	Callophrys	fotis		Desert Elfin	Lycaenidae	Lycaeninae	Callophrys	fotis					F		F	F
Lycaenidae	Theclinae	Callophrys	gryneus	gryneus, sweadneri, siva, smilacis, castalis, chalcosiva, juniperaria, mansfieldi	Lycaenidae	Theclinae	Callophrys	gryneus	gryneus, sweadneri, siva, smilacis, castalis, chalcosiva, juniperaria, mansfieldi	Lycaenidae	Theclinae	Callophrys	gryneus	gryneus, sweadneri, siva	Juniper Hairstreak	Lycaenidae	Lycaeninae	Callophrys	gryneus	gryneus, barryi, sweadneri, siva	O&W: notes C. gryneus "includes all juniper-feeding taxa, including barryi, loki (Skinner, 1907), siva (W.H. Edwards, 1874), and sweadneri (Chermock, 1945), among others; see Ferris (1991)."			F		F	F
Lycaenidae	Theclinae	Callophrys	gryneus	byrnei	Lycaenidae	Theclinae	Callophrys	gryneus	byrnei	Lycaenidae	Theclinae	Callophrys	gryneus			Lycaenidae	Lycaeninae	Callophrys	nelsoni	byrnei	O&W: Not on official list, just notes under C. nelsoni: "The status of C. byrnei K. Johnson, 1976* is uncertain (see Ferris 1991)." Assume he includes byrnei in nelsoni . NABA - no mention, assume included in C. gryneus (Not counted in tally because all lists accept as subspecies)
Lycaenidae	Theclinae	Callophrys	gryneus	plicataria	Lycaenidae	Theclinae	Callophrys	gryneus	plicataria	Lycaenidae	Theclinae	Callophrys	gryneus			Lycaenidae	Lycaeninae	Callophrys	nelsoni	plicataria	O&W: Not on official list - notes: "Putative areas of contact between nelsoni plicataria K. Johnson, 1976* and gryneus barryi K. Johnson, 1976* need further study (see Hinchliff 1994)." NABA - no mention, assume included in C. gryneus. (Not counted in tally because all lists accept as subspecies)
Lycaenidae	Theclinae	Callophrys	gryneus	nelsoni	Lycaenidae	Theclinae	Callophrys	gryneus	nelsoni	Lycaenidae	Theclinae	Callophrys	gryneus	nelsoni	Nelson's' Juniper Hairstreak	Lycaenidae	Lycaeninae	Callophrys	nelsoni					F, P		F, P	F, P
Lycaenidae	Theclinae	Callophrys	gryneus	rosneri	Lycaenidae	Theclinae	Callophrys	gryneus	rosneri	Lycaenidae	Theclinae	Callophrys	gryneus			Lycaenidae	Lycaeninae	Callophrys	nelsoni	rosneri	O&W: In notes for C. nelsoni includes subsp rosneri; Pelham/ITIS include subsp rosneri in gryneus. NABA - no mention, assume included in C. gryneus. (Not counted in tally because all lists accept as subspecies)
Lycaenidae	Theclinae	Callophrys	muiri		Lycaenidae	Theclinae	Callophrys	muiri		Lycaenidae	Theclinae	Callophrys	gryneus	muiri	Muir's' Juniper Hairstreak	Lycaenidae	Lycaeninae	Callophrys	muiri				P	F	P	F	F, P
Lycaenidae	Theclinae	Callophrys	gryneus	loki	Lycaenidae	Theclinae	Callophrys	loki	loki	Lycaenidae	Theclinae	Callophrys	gryneus	loki	Loki' Juniper Hairstreak	Lycaenidae	Lycaeninae	Callophrys	gryneus	loki	O&W: notes C. gryneus "includes all juniper-feeding taxa, including barryi, loki (Skinner, 1907), siva (W.H. Edwards, 1874), and sweadneri (Chermock, 1945), among others; see Ferris (1991).]"	P		F	P	F, P	F
Lycaenidae	Theclinae	Callophrys	thornei		Lycaenidae	Theclinae	Callophrys	loki	thornei	Lycaenidae	Theclinae	Callophrys	gryneus	thornei	'Thorne's' Juniper Hairstreak	Lycaenidae	Lycaeninae	Callophrys	thornei			P	P	F	S	F, P	F, P
Lycaenidae	Theclinae	Callophrys	henrici	henrici, margaretae, solatus, turneri, viridissima, yahwehus	Lycaenidae	Theclinae	Callophrys	henrici	henrici, margaretae, solatus, turneri, viridissima, yahwehus	Lycaenidae	Theclinae	Callophrys	henrici		Henry's Elfin	Lycaenidae	Lycaeninae	Callophrys	henrici					F		F	F
Lycaenidae	Theclinae	Callophrys	hesseli	hesseli, angulata	Lycaenidae	Theclinae	Callophrys	hesseli	hesseli, angulata	Lycaenidae	Theclinae	Callophrys	hesseli		Hessel's Hairstreak	Lycaenidae	Lycaeninae	Callophrys	hesseli					F		F	F
Lycaenidae	Theclinae	Callophrys	irus	irus, arsace, hadros	Lycaenidae	Theclinae	Callophrys	irus		Lycaenidae	Theclinae	Callophrys	irus		Frosted Elfin	Lycaenidae	Lycaeninae	Callophrys	irus					F		F	F
Lycaenidae	Theclinae	Callophrys	johnsoni		Lycaenidae	Theclinae	Callophrys	johnsoni		Lycaenidae	Theclinae	Callophrys	johnsoni		Johnson's Hairstreak	Lycaenidae	Lycaeninae	Callophrys	johnsoni					F		F	F
Lycaenidae	Theclinae	Callophrys	lanoraieensis		Lycaenidae	Theclinae	Callophrys	lanoraieensis		Lycaenidae	Theclinae	Callophrys	lanoraieensis		Bog Elfin	Lycaenidae	Lycaeninae	Callophrys	lanoraieensis					F		F	F
Lycaenidae	Theclinae	Callophrys	mcfarlandi		Lycaenidae	Theclinae	Callophrys	mcfarlandi		Lycaenidae	Theclinae	Callophrys	mcfarlandi		Sandia Hairstreak	Lycaenidae	Lycaeninae	Callophrys	mcfarlandi					F		F	F
Lycaenidae	Theclinae	Callophrys	mossii	bayensis, doudoroffi, hidakupa, marinensis, mossii, schryveri, windi	Lycaenidae	Theclinae	Callophrys	mossii	bayensis, doudoroffi, hidakupa, marinensis, mossii, schryveri, windi	Lycaenidae	Theclinae	Callophrys	mossii		Moss' Elfin	Lycaenidae	Lycaeninae	Callophrys	mossii					F		F	F
Lycaenidae	Theclinae	Callophrys	niphon	niphon, clarki	Lycaenidae	Theclinae	Callophrys	niphon	niphon, clarki	Lycaenidae	Theclinae	Callophrys	niphon		Eastern Pine Elfin	Lycaenidae	Lycaeninae	Callophrys	niphon					F		F	F
Lycaenidae	Theclinae	Callophrys	polios	polios, obscurus, maritima	Lycaenidae	Theclinae	Callophrys	polios	polios, obscurus, maritima	Lycaenidae	Theclinae	Callophrys	polios		Hoary Elfin	Lycaenidae	Lycaeninae	Callophrys	polios					F		F	F
Lycaenidae	Theclinae	Callophrys	sheridanii	sheridanii, comstocki, lemberti, pseudodumetorum, newcomeri, interrupta, paradoxa, neoperplexa, sacramento	Lycaenidae	Theclinae	Callophrys	sheridanii	sheridanii, comstocki, lemberti, pseudodumetorum, newcomeri, interrupta, paradoxa, neoperplexa, sacramento	Lycaenidae	Theclinae	Callophrys	sheridanii	sheridanii, comstocki, lemberti	Sheridan's Hairstreak	Lycaenidae	Lycaeninae	Callophrys	sheridanii					F		F	F
Lycaenidae	Theclinae	Callophrys	spinetorum	spinetorum, millerorum	Lycaenidae	Theclinae	Callophrys	spinetorum	spinetorum, millerorum	Lycaenidae	Theclinae	Callophrys	spinetorum		Thicket Hairstreak	Lycaenidae	Lycaeninae	Callophrys	spinetorum	millerorum	O&W: Includes millerorum Clench, 1981* as a synonym following Robbins (1990).]			F		F	F
Lycaenidae	Theclinae	Callophrys	xami	xami, texami	Lycaenidae	Theclinae	Callophrys	xami	xami, texami	Lycaenidae	Theclinae	Callophrys	xami		Xami Hairstreak	Lycaenidae	Lycaeninae	Callophrys	xami					F		F	F
Lycaenidae	Theclinae	Calycopis	cecrops		Lycaenidae	Theclinae	Calycopis	cecrops		Lycaenidae	Theclinae	Calycopis	cecrops		Red-banded Hairstreak	Lycaenidae	Lycaeninae	Calycopis	cecrops					F		F	F
Lycaenidae	Theclinae	Calycopis	isobeon		Lycaenidae	Theclinae	Calycopis	isobeon		Lycaenidae	Theclinae	Calycopis	isobeon		Dusky-blue Groundstreak	Lycaenidae	Lycaeninae	Calycopis	isobeon					F		F	F
Lycaenidae	Theclinae	Chlorostrymon	maesites		Lycaenidae	Theclinae	Chlorostrymon	maesites		Lycaenidae	Theclinae	Chlorostrymon	maesites		Amethyst Hairstreak	Lycaenidae	Lycaeninae	Chlorostrymon	maesites					F		F	F
Lycaenidae	Theclinae	Chlorostrymon	simaethis	simaethis, sarita	Lycaenidae	Theclinae	Chlorostrymon	simaethis	simaethis, sarita	Lycaenidae	Theclinae	Chlorostrymon	simaethis		Silver-banded Hairstreak	Lycaenidae	Lycaeninae	Chlorostrymon	simaethis					F		F	F
Lycaenidae	Theclinae	Chlorostrymon	telea		Lycaenidae	Theclinae	Chlorostrymon	telea		Lycaenidae	Theclinae	Chlorostrymon	telea		Telea Hairstreak	Lycaenidae	Lycaeninae	Chlorostrymon	telea					F		F	F
Lycaenidae	Theclinae	Cyanophrys	goodsoni		Lycaenidae	Theclinae	Cyanophrys	goodsoni		Lycaenidae	Theclinae	Cyanophrys	goodsoni		Goodson's Greenstreak	Lycaenidae	Lycaeninae	Cyanophrys	goodsoni					F		F	F
Lycaenidae	Theclinae	Cyanophrys	herodotus		Lycaenidae	Theclinae	Cyanophrys	herodotus		Lycaenidae	Theclinae	Cyanophrys	herodotus		Tropical Greenstreak	Lycaenidae	Lycaeninae	Cyanophrys	herodotus					F		F	F
Lycaenidae	Theclinae	Cyanophrys	miserabilis		Lycaenidae	Theclinae	Cyanophrys	miserabilis		Lycaenidae	Theclinae	Cyanophrys	miserabilis		Clench's Greenstreak	Lycaenidae	Lycaeninae	Cyanophrys	miserabilis					F		F	F
Lycaenidae	Theclinae	Electrostrymon	angelia	angelia	Lycaenidae	Theclinae	Electrostrymon	angelia	angelia	Lycaenidae	Theclinae	Electrostrymon	angelia		Fulvous Hairstreak	Lycaenidae	Lycaeninae	Electrostrymon	angelia					F		F	F
Lycaenidae	Theclinae	Electrostrymon	joya		Lycaenidae	Theclinae	Electrostrymon	joya		Lycaenidae	Theclinae	Electrostrymon	canus		Muted Hairstreak	Lycaenidae	Lycaeninae	Electrostrymon	joya					F		F	F
Lycaenidae	Theclinae	Electrostrymon	hugon		Lycaenidae	Theclinae	Electrostrymon	hugon		Lycaenidae	Theclinae	Electrostrymon	sangala		Ruddy Hairstreak	Lycaenidae	Lycaeninae	Electrostrymon	sangala		Pelham: hugon = sangala (Hewitson, 1868) Descr. new Spec. Lycaenidae: 35, no. 75; figured by Hewitson (1869), Ill. diurn. Lepid. Lycaenidae 2(4): pl. 54, figs. 314 ♀ D, 315 ♀ V. (synonymous)		S	F, S	S	F, S	F
Lycaenidae	Theclinae	Erora	laeta		Lycaenidae	Theclinae	Erora	laeta		Lycaenidae	Theclinae	Erora	laeta		Early Hairstreak	Lycaenidae	Lycaeninae	Erora	laeta					F		F	F
Lycaenidae	Theclinae	Erora	quaderna	sanfordi	Lycaenidae	Theclinae	Erora	quaderna	sanfordi	Lycaenidae	Theclinae	Erora	quaderna		Arizona Hairstreak	Lycaenidae	Lycaeninae	Erora	quaderna					F		F	F
Lycaenidae	Theclinae	Eumaeus	atala		Lycaenidae	Theclinae	Eumaeus	atala		Lycaenidae	Theclinae	Eumaeus	atala		Atala	Lycaenidae	Lycaeninae	Eumaeus	atala					F		F	F
Lycaenidae	Theclinae	Eumaeus	toxea		Lycaenidae	Theclinae	Eumaeus	toxea					N(r)			Lycaenidae	Lycaeninae	Eumaeus	toxea		NABA: moved to the "dubious" list in 2nd edition. Consider US specimens to not be a reliable indication that this species occurred naturally in the United States. O&W notes: [The occurrence of this species in our area needs to be verified; see Kendall & McGuire (1984).]		N(r)	F	N(r)	F	N(r)
Lycaenidae	Theclinae	Habrodais	grunus	grunus, herri, lorquini	Lycaenidae	Theclinae	Habrodais	grunus	grunus, herri, lorquini	Lycaenidae	Theclinae	Habrodais	grunus		Golden Hairstreak	Lycaenidae	Lycaeninae	Habrodais	grunus					F		F	F
Lycaenidae	Theclinae	Hypaurotis	crysalus	crysalus, intermedia, citima	Lycaenidae	Theclinae	Hypaurotis	crysalus	crysalus, intermedia, citima	Lycaenidae	Theclinae	Hypaurotis	crysalus		Colorado Hairstreak	Lycaenidae	Lycaeninae	Hypaurotis	crysalus					F		F	F
Lycaenidae	Theclinae	Hypostrymon	critola		Lycaenidae	Theclinae	Hypostrymon	critola		Lycaenidae	Theclinae	Hypostrymon	critola		Sonoran Hairstreak	Lycaenidae	Lycaeninae	Hypostrymon	critola					F		F	F
			N(r)		Lycaenidae	Theclinae	Kisutam	syllis					N(r)						N(r)		Pelham: Recorded from Texas by Bordelon (2009), News Lepid. Soc. 51(supplement S1): 77, and Rickard (2010), News Lepid. Soc. 52(4): 141, 3 figs. Bug Guide notes: "Rare stray to southern Texas; eastern and western Mexico to southern Brazil. First U.S. record Mission, Hidalgo County, Texas, 31-Dec-08 (Mike A. Rickard)"	N(r)			N(r)	N(r)
Lycaenidae	Theclinae	Ministrymon	azia		Lycaenidae	Theclinae	Ministrymon	azia		Lycaenidae	Theclinae	Ministrymon	azia		Gray Ministreak	Lycaenidae	Lycaeninae	Ministrymon	azia					F		F	F
Lycaenidae	Theclinae	Ministrymon	clytie		Lycaenidae	Theclinae	Ministrymon	clytie		Lycaenidae	Theclinae	Ministrymon	clytie		Clytie Ministreak	Lycaenidae	Lycaeninae	Ministrymon	clytie					F		F	F
Lycaenidae	Theclinae	Ministrymon	azia		Lycaenidae	Theclinae	Ministrymon	janevicroy		Lycaenidae	Theclinae	Ministrymon	azia		Gray Ministreak	Lycaenidae	Lycaeninae	Ministrymon	azia		Described by Glassberg 2013. ZooKeys 305: 3-7, as cryptic species previously included in M. azia	P		F	P	F, P	F
Lycaenidae	Theclinae	Ministrymon	leda		Lycaenidae	Theclinae	Ministrymon	leda		Lycaenidae	Theclinae	Ministrymon	leda		Leda Ministreak	Lycaenidae	Lycaeninae	Ministrymon	leda					F		F	F
Lycaenidae	Theclinae	Ocaria	ocrisia		Lycaenidae	Theclinae	Ocaria	ocrisia		Lycaenidae	Theclinae	Ocaria	ocrisia		Black Hairstreak	Lycaenidae	Lycaeninae	Ocaria	ocrisia					F		F	F
Lycaenidae	Theclinae	Oenomaus	ortygnus		Lycaenidae	Theclinae	Oenomaus	ortygnus		Lycaenidae	Theclinae	Oenomaus	ortygnus		Aquamarine Hairstreak	Lycaenidae	Lycaeninae	Oenomaus	ortygnus					F		F	F
			N(r)		Lycaenidae	Theclinae	Panthiades	bathildus					N(r)						N(r)		Probably a rare stray from S. Am - Pelhman doesn't note	R			R	R
Lycaenidae	Theclinae	Parrhasius	m-album		Lycaenidae	Theclinae	Parrhasius	m-album		Lycaenidae	Theclinae	Parrhasius	m-album		White M Hairstreak	Lycaenidae	Lycaeninae	Parrhasius	m-album					F		F	F
Lycaenidae	Theclinae	Phaeostrymon	alcestis	alcestis, oslari	Lycaenidae	Theclinae	Phaeostrymon	alcestis	alcestis, oslari	Lycaenidae	Theclinae	Phaeostrymon	alcestis		Soapberry Hairstreak	Lycaenidae	Lycaeninae	Phaeostrymon	alcestis					F		F	F
Lycaenidae	Theclinae	Rekoa	marius		Lycaenidae	Theclinae	Rekoa	marius		Lycaenidae	Theclinae	Rekoa	marius		Marius Hairstreak	Lycaenidae	Lycaeninae	Rekoa	marius					F		F	F
Lycaenidae	Theclinae	Rekoa	palegon		Lycaenidae	Theclinae	Rekoa	palegon		Lycaenidae	Theclinae	Rekoa	palegon		Gold-bordered Hairstreak	Lycaenidae	Lycaeninae	Rekoa	palegon					F		F	F
Lycaenidae	Theclinae	Satyrium	acadica	acadica, coolinensis, montanensis	Lycaenidae	Theclinae	Satyrium	acadica	acadica, montanensis	Lycaenidae	Theclinae	Satyrium	acadica		Acadian Hairstreak	Lycaenidae	Lycaeninae	Satyrium	acadica					F		F	F
Lycaenidae	Theclinae	Satyrium	auretorum	auretorum, fumosum, spadix	Lycaenidae	Theclinae	Satyrium	auretorum	auretorum, fumosum, spadix	Lycaenidae	Theclinae	Satyrium	auretorum		Gold-hunter's Hairstreak	Lycaenidae	Lycaeninae	Satyrium	auretorum					F		F	F
Lycaenidae	Theclinae	Satyrium	behrii	behrii, columbia, crossi	Lycaenidae	Theclinae	Satyrium	behrii	behrii, columbia, crossi	Lycaenidae	Theclinae	Satyrium	behrii		Behr's Hairstreak	Lycaenidae	Lycaeninae	Satyrium	behrii					F		F	F
Lycaenidae	Theclinae	Satyrium	calanus	albidus, calanus, falacer, godarti	Lycaenidae	Theclinae	Satyrium	calanus	albidus, calanus, falacer, godarti	Lycaenidae	Theclinae	Satyrium	calanus		Banded Hairstreak	Lycaenidae	Lycaeninae	Satyrium	calanus					F		F	F
Lycaenidae	Theclinae	Satyrium	californica	brashor, californica, cygnus, obscurafacies, wapiti	Lycaenidae	Theclinae	Satyrium	californica	californica, cygnus, obscurafacies, wapiti	Lycaenidae	Theclinae	Satyrium	californica		California Hairstreak	Lycaenidae	Lycaeninae	Satyrium	californica					F		F	F
Lycaenidae	Theclinae	Satyrium	caryaevorus		Lycaenidae	Theclinae	Satyrium	caryaevorus		Lycaenidae	Theclinae	Satyrium	caryaevorum		Hickory Hairstreak	Lycaenidae	Lycaeninae	Satyrium	caryaevorus				L	F	L	F	F, L
Lycaenidae	Theclinae	Satyrium	edwardsii	edwardsii, meridionale	Lycaenidae	Theclinae	Satyrium	edwardsii	edwardsii, meridionale	Lycaenidae	Theclinae	Satyrium	edwardsii		Edwards' Hairstreak	Lycaenidae	Lycaeninae	Satyrium	edwardsii					F		F	F
Lycaenidae	Theclinae	Satyrium	favonius	favonius, ontario, autolycus, violae	Lycaenidae	Theclinae	Satyrium	favonius	favonius, ontario, autolycus, violae	Lycaenidae	Theclinae	Satyrium	favonius	favonius, ontario	Oak Hairstreak	Lycaenidae	Lycaeninae	Satyrium	favonius					F		F	F
Lycaenidae	Theclinae	Satyrium	fuliginosa	fuliginosa, tildeni, albolineatum	Lycaenidae	Theclinae	Satyrium	fuliginosa	fuliginosa, tildeni, albolineatum	Lycaenidae	Theclinae	Satyrium	fulginosa		Sooty Hairstreak	Lycaenidae	Lycaeninae	Satyrium	fuliginosa				L	F	L	F	F, L
Lycaenidae	Theclinae	Satyrium	semiluna	semiluna, maculadistinctum	Lycaenidae	Theclinae	Satyrium	semiluna	semiluna, maculadistinctum	Lycaenidae	Theclinae	Satyrium	fulginosa			Lycaenidae	Lycaeninae	Satyrium	fuliginosa		NABA and O&W do not include this term. Probably include it in S. fulginosa, as Pelham states: "Original Combination: Satyrium fuliginosum semiluna"		P	F, P	P	F, P	F
Lycaenidae	Theclinae	Satyrium	ilavia		Lycaenidae	Theclinae	Satyrium	ilavia		Lycaenidae	Theclinae	Satyrium	ilavia		Ilavia Hairstreak	Lycaenidae	Lycaeninae	Satyrium	ilavia					F		F	F
Lycaenidae	Theclinae	Satyrium	kingi		Lycaenidae	Theclinae	Satyrium	kingi		Lycaenidae	Theclinae	Satyrium	kingi		King's Hairstreak	Lycaenidae	Lycaeninae	Satyrium	kingi					F		F	F
Lycaenidae	Theclinae	Satyrium	liparops	aliparops, fletcheri, floridensis, liparops, strigosa	Lycaenidae	Theclinae	Satyrium	liparops	aliparops, fletcheri, floridensis, liparops, strigosa	Lycaenidae	Theclinae	Satyrium	liparops		Striped Hairstreak	Lycaenidae	Lycaeninae	Satyrium	liparops					F		F	F
Lycaenidae	Theclinae	Satyrium	polingi	polingi, organensis	Lycaenidae	Theclinae	Satyrium	polingi	polingi, organensis	Lycaenidae	Theclinae	Satyrium	polingi		Poling's Hairstreak	Lycaenidae	Lycaeninae	Satyrium	polingi					F		F	F
Lycaenidae	Theclinae	Satyrium	saepium	saepium, fulvescens, chalcis, rubrotenebrosum, caliginosum, chlorophora, subaridum, obscurofuscum, latalinea, provo	Lycaenidae	Theclinae	Satyrium	saepium	saepium, fulvescens, chalcis, rubrotenebrosum, caliginosum, chlorophora, subaridum, obscurofuscum, latalinea, provo	Lycaenidae	Theclinae	Satyrium	saepium		Hedgerow Hairstreak	Lycaenidae	Lycaeninae	Satyrium	saepium					F		F	F
Lycaenidae	Theclinae	Satyrium	sylvinus	sylvinus, nootka, putnami, megapallidum, itys, desertorum, dryope	Lycaenidae	Theclinae	Satyrium	sylvinus	sylvinus, nootka, putnami, megapallidum, itys, desertorum, dryope	Lycaenidae	Theclinae	Satyrium	sylvinus		Sylvan Hairstreak	Lycaenidae	Lycaeninae	Satyrium	sylvinus					F		F	F
Lycaenidae	Theclinae	Satyrium	tetra		Lycaenidae	Theclinae	Satyrium	tetra		Lycaenidae	Theclinae	Satyrium	tetra		Mountain Mahogany Hairstreak	Lycaenidae	Lycaeninae	Satyrium	tetra					F		F	F
Lycaenidae	Theclinae	Satyrium	titus	titus, winteri, campus, watsoni, immaculosus, occidentalis	Lycaenidae	Theclinae	Satyrium	titus	titus, winteri, campus, watsoni, immaculosus, occidentalis	Lycaenidae	Theclinae	Satyrium	titus		Coral Hairstreak	Lycaenidae	Lycaeninae	Satyrium	titus					F		F	F
Lycaenidae	Theclinae	Strephonota	tephraeus		Lycaenidae	Theclinae	Strephonota	tephraeus		Lycaenidae	Theclinae	Siderus	tephraeus		Pearly-gray Hairstreak	Lycaenidae	Lycaeninae	Strephonota	tephraeus					F		F	F
Lycaenidae	Theclinae	Strymon	acis	bartrami	Lycaenidae	Theclinae	Strymon	acis	bartrami	Lycaenidae	Theclinae	Strymon	acis		Bartram's Scrub-Hairstreak	Lycaenidae	Lycaeninae	Strymon	acis					F		F	F
Lycaenidae	Theclinae	Strymon	albata		Lycaenidae	Theclinae	Strymon	albata		Lycaenidae	Theclinae	Strymon	albata		White Scrub-Hairstreak	Lycaenidae	Lycaeninae	Strymon	albata					F		F	F
Lycaenidae	Theclinae	Strymon	alea		Lycaenidae	Theclinae	Strymon	alea		Lycaenidae	Theclinae	Strymon	alea		Lacey's Scrub-Hairstreak	Lycaenidae	Lycaeninae	Strymon	alea					F		F	F
Lycaenidae	Theclinae	Strymon	avalona		Lycaenidae	Theclinae	Strymon	avalona		Lycaenidae	Theclinae	Strymon	avalona		Avalon Scrub-Hairstreak	Lycaenidae	Lycaeninae	Strymon	avalona					F		F	F
Lycaenidae	Theclinae	Strymon	bazochii	bazochii, gundlachianus	Lycaenidae	Theclinae	Strymon	bazochii	bazochii	Lycaenidae	Theclinae	Strymon	bazochii		Lantana Scrub-Hairstreak	Lycaenidae	Lycaeninae	Strymon	bazochii					F		F	F
Lycaenidae	Theclinae	Strymon	bebrycia		Lycaenidae	Theclinae	Strymon	bebrycia		Lycaenidae	Theclinae	Strymon	bebrycia		Red-lined Scrub-Hairstreak	Lycaenidae	Lycaeninae	Strymon	bebrycia					F		F	F
Lycaenidae	Theclinae	Strymon	cestri		Lycaenidae	Theclinae	Strymon	cestri		Lycaenidae	Theclinae	Strymon	cestri		Tailless Scrub-Hairstreak	Lycaenidae	Lycaeninae	Strymon	cestri					F		F	F
Lycaenidae	Theclinae	Strymon	istapa	clenchi, istapa, modesta	Lycaenidae	Theclinae	Strymon	istapa	clenchi, istapa, modesta	Lycaenidae	Theclinae	Strymon	istapa		Mallow Scrub-Hairstreak	Lycaenidae	Lycaeninae	Strymon	istapa					F		F	F
Lycaenidae	Theclinae	Strymon	limenia		Lycaenidae	Theclinae	Strymon	limenia		Lycaenidae	Theclinae	Strymon	limenia		Disguised Scrub-Hairstreak	Lycaenidae	Lycaeninae	Strymon	limenia					F		F	F
Lycaenidae	Theclinae	Strymon	martialis		Lycaenidae	Theclinae	Strymon	martialis		Lycaenidae	Theclinae	Strymon	martialis		Martial Scrub-Hairstreak	Lycaenidae	Lycaeninae	Strymon	martialis					F		F	F
Lycaenidae	Theclinae	Strymon	melinus	melinus, humuli, franki, setonia, atrofasciata, pudica	Lycaenidae	Theclinae	Strymon	melinus	melinus, humuli, franki, setonia, atrofasciata, pudica	Lycaenidae	Theclinae	Strymon	melinus		Gray Hairstreak	Lycaenidae	Lycaeninae	Strymon	melinus					F		F	F
Lycaenidae	Theclinae	Strymon	rufofusca		Lycaenidae	Theclinae	Strymon	rufofusca		Lycaenidae	Theclinae	Strymon	rufofusca		Red-crescent Scrub-Hairstreak	Lycaenidae	Lycaeninae	Strymon	rufofusca					F		F	F
Lycaenidae	Theclinae	Strymon	serapio		Lycaenidae	Theclinae	Strymon	serapio		Lycaenidae	Theclinae	Strymon	serapio		Bromeliad Scrub-Hairstreak	Lycaenidae	Lycaeninae	Strymon	serapio					F		F	F
			N(r)		Lycaenidae	Theclinae	Strymon	solitario					N(r)						N(r)			N(r)			N(r)	N(r)
Lycaenidae	Theclinae	Strymon	yojoa		Lycaenidae	Theclinae	Strymon	yojoa		Lycaenidae	Theclinae	Strymon	yojoa		Yojoa Scrub-Hairstreak	Lycaenidae	Lycaeninae	Strymon	yojoa					F		F	F
Lycaenidae	Theclinae	Tmolus	echion	echiolus	Lycaenidae	Theclinae	Strymon	echion	echiolus	Lycaenidae	Theclinae	Tmolus	echion		Red-spotted Hairstreak	Lycaenidae	Lycaeninae	Tmolus	echion			G		F	G	F, G	F
Lycaenidae	Theclinae	Ziegleria	guzanta		Lycaenidae	Theclinae	Electrostrymon	guzanta					N(r)						N(r)		Recorded from Texas by A. Warren et al. (2004), News Lepid. Soc. 46(1): 28-30, 15 figs. a rare stray from S. Am.	G	N(r)	N(r)	N(r)	N(r)
Riodinidae	Riodininae	Apodemia	virgulti	mojavelimbus, nigrescens, peninsularis, pratti, virgulti, dialeucoides, arenaria, davenporti	Riodinidae	Riodininae	Apodemia	virgulti	mojavelimbus, nigrescens, peninsularis, pratti, virgulti, dialeucoides, arenaria, davenporti	Riodinidae		Apodemia	mormo	virgulti	Mormon Metalmark	Riodinidae	Riodininae	Apodemia	virgulti				P		P		P
Riodinidae	Riodininae	Apodemia	mejicanus	deserti, mejicanus, pueblo	Riodinidae	Riodininae	Apodemia	mejicanus	deserti, mejicanus, pueblo	Riodinidae		Apodemia	mormo	mejicanus	Mormon Metalmark	Riodinidae	Riodininae	Apodemia	mejicanus				P		P		P
Riodinidae	Riodininae	Apodemia	duryi		Riodinidae	Riodininae	Apodemia	duryi		Riodinidae		Apodemia	mormo	duryi	Mormon Metalmark	Riodinidae	Riodininae	Apodemia	duryi				P		P		P
Riodinidae	Riodininae	Apodemia	chisosensis		Riodinidae	Riodininae	Apodemia	chisosensis		Riodinidae		Apodemia	nais	chisosensis	'Chisos' Nais Metalmark	Riodinidae	Riodininae	Apodemia	chisosensis				P		P		P
			N(r)		Riodinidae	Riodininae	Baeotis	zonata	zonata				N(r)						N(r)		Reported from Arizona by Saba & Winslow (2009), News Lepid. Soc. 51(1): 10, 30.	N(r)			N(r)	N(r)
Riodinidae	Riodininae	Calephelis	muticum		Riodinidae	Riodininae	Calephelis	muticum		Riodinidae		Calephelis	mutica		Swamp Metalmark	Riodinidae	Riodininae	Calephelis	muticum				S		S		S
Riodinidae	Riodininae	Calephelis	freemani		Riodinidae	Riodininae	Calephelis	freemani		Riodinidae		Calephelis	rawsoni	freemani	'Freeman's' Rawson's Metalmark	Riodinidae	Riodininae	Calephelis	freemani				P		P		P
Riodinidae	Riodininae	Lasaia	maria	maria	Riodinidae	Riodininae	Lasaia	maria	maria				N(r)			Riodinidae	Riodininae	Lasaia	maria		NABA: Reported as “recently reported for se. Ariz.” by Opler (1999). However, there exists no authenticated report. Not included in First Edition.		N(r)		N(r)		N(r)
Pieridae	Coliadinae	Colias	harfordii		Pieridae	Coliadinae	Colias	harfordii		Pieridae	Coliadinae	Colias	alexandra	harfordii	'Harford's' Queen Alexandra's Sulphur	Pieridae	Coliadinae	Colias	harfordii				P		P		P
Pieridae	Coliadinae	Colias	christina	krauthii	Pieridae	Coliadinae	Colias	christina	krauthii	Pieridae	Coliadinae	Colias	alexandra	krauthii	Queen Alexandra's Sulphur	Pieridae	Coliadinae	Colias	christina	krauthii, kluanensis, pseudochristina, astraea			S		S		S
Pieridae	Coliadinae	Colias	tyche	boothii	Pieridae	Coliadinae	Colias	tyche	boothii	Pieridae	Coliadinae	Colias	boothii			Pieridae	Coliadinae	Colias	tyche	boothii			P		P		P
Pieridae	Coliadinae	Colias	tyche	thula	Pieridae	Coliadinae	Colias	tyche	thula	Pieridae	Coliadinae	Colias	nastes	thula (Labrador Sulphur)	Labrador Sulphur	Pieridae	Coliadinae	Colias	tyche	thula			S		S		S
Pieridae	Coliadinae	Zerene	cesonia	cesonia	Pieridae	Coliadinae	Zerene	cesonia	cesonia	Pieridae	Coliadinae	Colias	cesonia		Southern Dogface	Pieridae	Coliadinae	Zerene	cesonia				G		G		G
Pieridae	Coliadinae	Zerene	eurydice		Pieridae	Coliadinae	Zerene	eurydice		Pieridae	Coliadinae	Colias	eurydice		California Dogface	Pieridae	Coliadinae	Zerene	eurydice				G		G		G
Pieridae	Coliadinae	Colias	pelidne	skinneri	Pieridae	Coliadinae	Colias	skinneri		Pieridae	Coliadinae	Colias	pelidne		Pelidne Sulphur	Pieridae	Coliadinae	Colias	pelidne			P			P	P
			N(n)		Pieridae	Coliadinae	Colias	rankinensis					N(n)						N(n)			N			N	N
Pieridae	Coliadinae	Colias	scudderii		Pieridae	Coliadinae	Colias	scudderii		Pieridae	Coliadinae	Colias	scudderi		Scudder's Sulphur	Pieridae	Coliadinae	Colias	scudderii				L		L		L
Pieridae	Coliadinae	Pyrisitia	dina	helios, westwoodii	Pieridae	Coliadinae	Pyrisitia	dina	helios, westwoodii	Pieridae	Coliadinae	Eurema	dina		Dina Yellow	Pieridae	Coliadinae	Pyrisitia	dina				G		G		G
Pieridae	Coliadinae	Pyrisitia	lisa	lisa, centralis	Pieridae	Coliadinae	Pyrisitia	lisa	lisa, centralis	Pieridae	Coliadinae	Eurema	lisa		Little Yellow	Pieridae	Coliadinae	Pyrisitia	lisa				G		G		G
Pieridae	Coliadinae	Pyrisitia	messalina		Pieridae	Coliadinae	Pyrisitia	messalina		Pieridae	Coliadinae	Eurema	messalina		Shy Yellow	Pieridae	Coliadinae	Pyrisitia	messalina				G		G		G
Pieridae	Coliadinae	Abaeis	nicippe		Pieridae	Coliadinae	Abaeis	nicippe		Pieridae	Coliadinae	Eurema	nicippe		Sleepy Orange	Pieridae	Coliadinae	Abaeis	nicippe				G		G		G
Pieridae	Coliadinae	Pyrisitia	nise	nise, nelphe	Pieridae	Coliadinae	Pyrisitia	nise	nise, nelphe	Pieridae	Coliadinae	Eurema	nise		Mimosa Yellow	Pieridae	Coliadinae	Pyrisitia	nise				G		G		G
Pieridae	Coliadinae	Pyrisitia	proterpia		Pieridae	Coliadinae	Pyrisitia	proterpia		Pieridae	Coliadinae	Eurema	proterpia		Tailed Orange	Pieridae	Coliadinae	Pyrisitia	proterpia				G		G		G
Pieridae	Coliadinae	Phoebis	argante	argante	Pieridae	Coliadinae	Phoebis	argante	argante				N(r)			Pieridae	Coliadinae	Phoebis	argante				N(r)		N(r)		N(r)
			N(r)		Pieridae	Coliadinae	Aphrissa	neleis					N(r)						N(r)			N(r)			N(r)	N(r)
Pieridae	Pierinae	Anthocharis	sara	flora, inghami, gunderi, alaskensis, sulfuris, browningi, pseudothoosa	Pieridae	Pierinae	Anthocharis	sara	flora, inghami, gunderi, sempervirens, alaskensis, sulfuris, browningi, colorado, prestonorum, pseudothoosa	Pieridae	Pierinae	Anthocharis	sara		Sara Orangetip				N(?)					?		?	?
Pieridae	Pierinae	Anthocharis	sara	sara	Pieridae	Pierinae	Anthocharis	sara	sara	Pieridae	Pierinae	Anthocharis	sara	sara	Pacific' Sara Orangetip	Pieridae	Pierinae	Anthocharis	sara					P		P	P
Pieridae	Pierinae	Anthocharis	sara	stella	Pieridae	Pierinae	Anthocharis	sara	stella	Pieridae	Pierinae	Anthocharis	sara	stella	'Stella' Sara Orangetip	Pieridae	Pierinae	Anthocharis	stella					P		P	P
Pieridae	Pierinae	Anthocharis	sara	julia	Pieridae	Pierinae	Anthocharis	sara	julia	Pieridae	Pierinae	Anthocharis	sara	julia	Sara Orangetip	Pieridae	Pierinae	Anthocharis	julia					P		P	P
Pieridae	Pierinae	Anthocharis	sara	thoosa	Pieridae	Pierinae	Anthocharis	sara	thoosa	Pieridae	Pierinae	Anthocharis	sara	thoosa	Sara Orangetip	Pieridae	Pierinae	Anthocharis	thoosa					P		P	P
Pieridae	Pierinae	Euchloe	lotta		Pieridae	Pierinae	Euchloe	lotta		Pieridae	Pierinae	Euchloe	hyantis	lotta	'Desert' Pearly Marble	Pieridae	Pierinae	Euchloe	lotta				P		P		P
Pieridae	Pierinae	Itaballia	demophile	centralis	Pieridae	Pierinae	Itaballia	demophile	centralis				N(r)						N(r)				N(r)	N(r)	N(r)	N(r)
Pieridae	Pierinae	Leptophobia	aripa	elodia	Pieridae	Pierinae	Leptophobia	aripa	elodia				N(r)			Pieridae	Pierinae	Leptophobia	aripa				N(r)		N(r)		N(r)
Pieridae	Pierinae	Melete	lycimnia	isandra	Pieridae	Pierinae	Melete	lycimnia	isandra				N(r)						N(r)				N(r)	N(r)	N(r)	N(r)
Pieridae	Pierinae	Neophasia	terlooii		Pieridae	Pierinae	Neophasia	terlooii		Pieridae	Pierinae	Neophasia	terlootii		Chiricahua White	Pieridae	Pierinae	Neophasia	terlooii				L		L		L
Pieridae	Pierinae	Pieriballia	viardi	viardi	Pieridae	Pierinae	Pieriballia	viardi	viardi				N(r)						N(r)				N(r)	N(r)	N(r)	N(r)
Pieridae	Pierinae	Pieris	napi	napi				R		Pieridae	Pierinae	Pieris	napi		Mustard White				N(r)			N(r)		N(r)	N(r)		N(r)
Pieridae	Pierinae	Pieris	angelika		Pieridae	Pierinae	Pieris	angelika		Pieridae	Pierinae	Pieris	napi	angelika	Mustard White	Pieridae	Pierinae	Pieris	angelika				P		P		P
Pieridae	Pierinae	Pieris	oleracea	oleracea, frigida	Pieridae	Pierinae	Pieris	oleracea	oleracea, frigida	Pieridae	Pierinae	Pieris	napi	oleracea	'Veined' Mustard White	Pieridae	Pierinae	Pieris	oleracea				P		P		P
Pieridae	Pierinae	Pieris	marginalis	pseudobryoniae, shapiroi, hulda, meckyae, guppyi, tremblayi, reicheli, sequoia, venosa, castoria, zeigleri, pallidissima, mogollon, pseudonapi	Pieridae	Pierinae	Pieris	marginalis	pseudobryoniae, shapiroi, hulda, meckyae, guppyi, tremblayi, reicheli, sequoia, venosa, castoria, zeigleri, pallidissima, macdunnoughii, mogollon	Pieridae	Pierinae	Pieris	napi	marginalis, meckyae, macdunnoughii	'Margined' Mustard White	Pieridae	Pierinae	Pieris	marginalis				P		P		P
			N(r)		Papilionidae	Papilioninae	Mimoides	phaon	phaon				N(r)						N(r)		PELHAM: Reported for Texas by Reid (2008), News Lepid. Soc. 50(3/4): 75, 87. Rare? Stray?	N(r)			N(r)	N(r)
Papilionidae	Papilioninae	Papilio	alexiares	garcia	Papilionidae	Papilioninae	Papilio	alexiares	garcia				N(r)						N(r)		PELHAM: Recorded from Texas by Grishin and A. Warren (2004), News Lepid. Soc. 46(3): 75, 83, 15 figs. Various recent authors (e.g. Tyler et al. (1994), Swallowtail Butterflies Am.: 33, Llorente et al. (1996), Biodivers. Taxon. Biogeogr. Artrop. Méx.: 545, (1997), Pap. Pier. Méx.: 8, 15, 51, 137, 162, 198, and Lamas (2004c), Atl. Neotrop. Lepid. Chcklst. Part 4A: 97) have considered alexiares and …		N(r)	N(r)	N(r)	N(r)
Papilionidae	Papilioninae	Papilio	appalachiensis		Papilionidae	Papilioninae	Papilio	appalachiensis					N(?)						N(?)		O&W: Pterourus appalachiensis Pavulaan & D. Wright, 2002* was recently described, but convincing evidence for its treatment as a full species is lacking. It seems to be allopatric to glaucus itself, and it might be a high altitude, single-brooded population of glaucus; or it could be related to canadensis. Further information is needed to determine its status.] Pelham: Tax. Rep. Int. Lepid. Surv.…		?	?		?	?
Papilionidae	Papilioninae	Papilio	garamas	abderus	Papilionidae	Papilioninae	Papilio	multicaudata	abderus	Papilionidae	Papilioninae	Papilio	garamas	abderus	Magnificent Swallowtail	Papilionidae	Papilioninae	Papilio	garamas	abderus	O&W: [Papilio garamas abderus Hoppfer, 1856 was reported from south Texas by Bordelon & Knudson (2000).] Pelham: Original Combination: Papilio Multicaudata Recorded from Texas by Bordelon and Knudson (2000), News Lepid. Soc. 42(1): 7, pl. 1, fig. 1. NABA: Bordelon and Knudson (2000) recently reported about and illustrated a clearly identifiable specimen collected in Cameron County, Texas in Sept.…	S			S	S
Papilionidae	Papilioninae	Parides	eurimedes	mylotes	Papilionidae	Papilioninae	Parides	eurimedes	mylotes				N(r)			Papilionidae	Papilioninae	Parides	eurimedes		Rare stray .NABA says: One stray reported from Texas, perhaps erroneously.		N(r)		N(r)		N(r)
Papilionidae	Parnassiinae	Parnassius	smintheus	sternitzkyi, olympianna, yukonensis, smintheus, magnus, maximus, sayii, pseudorotgeri	Papilionidae	Parnassiinae	Parnassius	smintheus	sternitzkyi, olympianna, yukonensis, smintheus, magnus, maximus, sayii, pseudorotgeri	Papilionidae	Parnassiinae	Parnassius	phoebus	smintheus	Rocky Mountain' Phoebus Parnassian	Papilionidae	Parnassiinae	Parnassius	smintheus				P		P		P
Papilionidae	Parnassiinae	Parnassius	behrii		Papilionidae	Parnassiinae	Parnassius	behrii		Papilionidae	Parnassiinae	Parnassius	phoebus	behri	'Sierra Nevada' Phoebus Parnassian	Papilionidae	Parnassiinae	Parnassius	behrii				P		P		P
Hesperiidae	Hesperiinae	Notamblyscirtes	simius		Hesperiidae	Hesperiinae	Notamblyscirtes	simius		Hesperiidae	Hesperiinae	Amblyscirtes	simius		Simius Roadside-Skipper	Hesperiidae	Hesperiinae	Amblyscirtes	simius		Typo/spelling		L	L	L	L
Hesperiidae	Hesperiinae	Atrytonopsis	loammi		Hesperiidae	Hesperiinae	Atrytonopsis	loammi		Hesperiidae	Hesperiinae	Atrytonopsis	hianna	loammi	Dusted Skipper	Hesperiidae	Hesperiinae	Atrytonopsis	loammi				P		P		P
Hesperiidae	Hesperiinae	Copaeodes	minima		Hesperiidae	Hesperiinae	Copaeodes	minima		Hesperiidae	Hesperiinae	Copaeodes	minimus		Southern Skipperling	Hesperiidae	Hesperiinae	Copaeodes	minima				L		L		L
Hesperiidae	Hesperiinae	Cymaenes	trebius		Hesperiidae	Hesperiinae	Cymaenes	trebius		Hesperiidae	Hesperiinae	Cymaenes	odilia		Fawn-spotted Skipper	Hesperiidae	Hesperiinae	Cymaenes	trebius		O&W: [Cymaenes trebius was treated as a species distinct from C. odilia (Burmeister, 1878) by Warren (2000, 2002); however, relationships among taxa placed with odilia by Evans (1955) are under study by G. Austin and ADW.]; unclear if Pelham includes odilia in trebius.		S		S		S
Hesperiidae	Hesperiinae	Erionota	thrax	thrax	Hesperiidae	Hesperiinae	Erionota	thrax	thrax	Hesperiidae	Hesperiinae	Erionota	thrax		Banana Skipper	Hesperiidae	Hesperiidae	Erionota	torus		O&W - on Hawaiian Butterflies list with this comment: [Originally misdetermined as E. thrax (Linnaeus, 1767) by Riotte & Uchida (1979).]			S		S	S
Hesperiidae	Hesperiinae	Hesperia	colorado	colorado, ochracea, oroplata, susanae, mojavensis, idaho, leussleri, tildeni, harpalus, oregonia, mattoonorum, dodgei	Hesperiidae	Hesperiinae	Hesperia	colorado	colorado, ochracea, oroplata, susanae, mojavensis, idaho, leussleri, tildeni, harpalus, oregonia, mattoonorum, dodgei	Hesperiidae	Hesperiinae	Hesperia	comma	colorado	Common Branded Skipper	Hesperiidae	Hesperiinae	Hesperia	colorado		Assume NABA H. comma colorado synonymous with H. colorado?		P		P		P
Hesperiidae	Hesperiinae	Hesperia	assiniboia		Hesperiidae	Hesperiinae	Hesperia	assiniboia		Hesperiidae	Hesperiinae	Hesperia	comma	assiniboia	Common Branded Skipper	Hesperiidae	Hesperiinae	Hesperia	assiniboia				P		P		P
Hesperiidae	Hesperiinae	Lerodea	arabus		Hesperiidae	Hesperiinae	Lerodea	arabus		Hesperiidae	Hesperiinae	Lerodea	dysaules		Olive-clouded Skipper	Hesperiidae	Hesperiinae	Lerodea	arabus		O&W: L arabus Includes dysaules Godman, 1900; as a synonym (Warren 2000, 2002).].		S		S		S
Hesperiidae	Hesperiinae	Panoquina	lucas		Hesperiidae	Hesperiinae	Panoquina	lucas		Hesperiidae	Hesperiinae	Panoquina	sylvicola		Purple-washed Skipper	Hesperiidae	Hesperiinae	Panoquina	lucas		[Panoquina sylvicola (Herrich-Schäffer, 1865) was treated as a synonym of lucas by Robbins et al. (1996); also see Mielke & Casagrande (2002).] Pelham: P. lucas = sylvicola (Herrich-Schäffer, 1865)		S		S		S
Hesperiidae	Hesperiinae	Perichares	philetes	adela	Hesperiidae	Hesperiinae	Perichares	adela		Hesperiidae	Hesperiinae	Perichares	philetes		Green-backed Ruby-eye	Hesperiidae	Hesperiinae	Perichares	philetes		Pelham says: Burns et al. (2008), Proc. Nat. Acad. Sci. USA 105(17): 6350-6355, determine that this is a species distinct from Perichares philetes (Gmelin, [1790]).	P			P	P
Hesperiidae	Hesperiinae	Synapte	pecta		Hesperiidae	Hesperiinae	Synapte	pecta		Hesperiidae	Hesperiinae	Synapte	malitiosa		Malicious Skipper	Hesperiidae	Hesperiinae	Synapte	pecta		O&W: [Warren (2000, 2002) treated S. pecta and S. malitiosa (Herrich-Schäffer, 1865) as separate species.] Pelham: Synapte pecta Evans, 1955 Cat. Am. Hesp. Brit. Mus. (4): 51. Original Combination: [Synapte malitiosa] pecta Type Locality: “Mexico” Types: Holotype in BMNH. A. Warren et al. (1998), J. Lepid. Soc. 52(1): 53, and A. Warren (2000), in: Llorente et al., Biodivers. Taxon. Biogeogr. Artr…		S		S		S
Hesperiidae	Hesperiinae	Synapte	shiva		Hesperiidae	Hesperiinae	Synapte	shiva		Hesperiidae	Hesperiinae	Synapte	syraces		Faceted Skipper	Hesperiidae	Hesperiinae	Synapte	shiva or syraces		O&W:[We are uncertain if it is Synapte syraces (Godman, 1901), or the similar S. shiva Evans, 1955* (or both?) that is known from Arizona (Bailowitz & Brock 1991), since we have not examined specimens; both species occur in Sonora, Mexico. Synapte shiva was described as a subspecies of syraces, but was treated as a full species by Warren (2000, 2002).] It may be that in the US, these names refer …		S		S
Hesperiidae	Hesperiinae	Synapte	syraces		Hesperiidae	Hesperiinae	Synapte	shiva		Hesperiidae	Hesperiinae	Synapte	syraces		Faceted Skipper	Hesperiidae	Hesperiinae	Synapte	shiva or syraces		O&W:[We are uncertain if it is Synapte syraces (Godman, 1901), or the similar S. shiva Evans, 1955* (or both?) that is known from Arizona (Bailowitz & Brock 1991), since we have not examined specimens; both species occur in Sonora, Mexico. Synapte shiva was described as a subspecies of syraces, but was treated as a full species by Warren (2000, 2002).] It may be that in the US, these names refer …	S			S
Hesperiidae	Heteropterinae	Piruna	aea	mexicana	Hesperiidae	Heteropterinae	Piruna	aea	mexicana	Hesperiidae	Heteropterinae	Piruna	cingo		Many-spotted Skipperling	Hesperiidae	Heteropterinae	Piruna	aea		O&W: [Previously known as P. cingo Evans, 1955*, which was treated as a synonym of aea by Warren (2000, 2002).] Pelham indicates synonymy: aea = cingo Evans, 1955 Cat. Am. Hesp. Brit. Mus. (4): 14, pl. 54 ♂ genitalia. Original Combination: [Piruna] cingo.		S		S		S
Hesperiidae	Heteropterinae	Piruna	penaea		Hesperiidae	Heteropterinae	Piruna	penaea		Hesperiidae	Heteropterinae	Piruna	microstictus		Small-spotted Skipperling	Hesperiidae	Heteropterinae	Piruna	penaea		O&W: [Previously misidentifed as P. microsticta (Godman, 1900) (see McGuire & Rickard 1976), a southwestern Mexican species (Freeman & Warren, in preparation).] Pelham: Opler and A. Warren (2002), Sci. Names List Butterflies N. A.: 8, applied this name to the skipper previously reported (from Texas) as Piruna microsticta (Godman, 1900), in: Godman & Salvin, Biol. centr.-amer., Lep. Rhop. 2(156): …		S		S		S
Hesperiidae	Hesperiinae	Agathymus	alliae	alliae, paiute	Hesperiidae	Hesperiinae	Agathymus	alliae	alliae, paiute	Hesperiidae	Megathyminae	Agathymus	alliae		Mojave Giant-Skipper	Hesperiidae	Hesperiinae	Agathymus	alliae				F		F		F
Hesperiidae	Hesperiinae	Agathymus	aryxna		Hesperiidae	Hesperiinae	Agathymus	aryxna		Hesperiidae	Megathyminae	Agathymus	aryxna		Arizona Giant-Skipper	Hesperiidae	Hesperiinae	Agathymus	aryxna				F		F		F
Hesperiidae	Hesperiinae	Agathymus	baueri	baueri, freemani	Hesperiidae	Hesperiinae	Agathymus	baueri	baueri, freemani	Hesperiidae	Megathyminae	Agathymus	aryxna	baueri	Arizona Giant-Skipper	Hesperiidae	Hesperiinae	Agathymus	baueri				F, P		F, P		F, P
Hesperiidae	Hesperiinae	Agathymus	gentryi		Hesperiidae	Hesperiinae	Agathymus	gentryi		Hesperiidae	Megathyminae	Agathymus	aryxna	gentryi	Arizona Giant-Skipper	Hesperiidae	Hesperiinae	Agathymus	gentryi				F, P		F, P		F, P
Hesperiidae	Hesperiinae	Agathymus	evansi		Hesperiidae	Hesperiinae	Agathymus	evansi		Hesperiidae	Megathyminae	Agathymus	evansi		Huachuca Giant-Skipper	Hesperiidae	Hesperiinae	Agathymus	evansi				F		F		F
Hesperiidae	Hesperiinae	Agathymus	mariae	chinatiensis, lajitaensis, mariae, rindgei	Hesperiidae	Hesperiinae	Agathymus	mariae	chinatiensis, lajitaensis, mariae, rindgei	Hesperiidae	Megathyminae	Agathymus	mariae		Mary's Giant-Skipper	Hesperiidae	Hesperiinae	Agathymus	mariae				F		F		F
Hesperiidae	Hesperiinae	Agathymus	neumoegeni	carlsbadensis, chisosensis, diabloensis, florenceae, judithae, mcalpinei, neumoegeni	Hesperiidae	Hesperiinae	Agathymus	neumoegeni	carlsbadensis, chisosensis, diabloensis, florenceae, judithae, mcalpinei, neumoegeni	Hesperiidae	Megathyminae	Agathymus	neumoegeni		Orange Giant-Skipper	Hesperiidae	Hesperiinae	Agathymus	neumoegeni				F		F		F
Hesperiidae	Hesperiinae	Agathymus	estelleae	valverdiensis	Hesperiidae	Hesperiinae	Agathymus	estelleae	valverdiensis	Hesperiidae	Megathyminae	Agathymus	remingtoni		Coahuila Giant-Skipper	Hesperiidae	Hesperiinae	Agathymus	estelleae		Pelham: Roever (1975), in: Howe, Butterflies N. Am.: 415, considered valverdiensis a “weak subspecies” of estelleae. Scott (1986), Butterflies N. Am.: 423, considered valverdiensis and estelleae to be subspecies of A. remingtoni D. Stallings & Turner, 1958, Lepid. News 11(4-5): 117.		F, S		F, S		F, S
Hesperiidae	Hesperiinae	Agathymus	stephensi		Hesperiidae	Hesperiinae	Agathymus	stephensi		Hesperiidae	Megathyminae	Agathymus	stephensi		California Giant-Skipper	Hesperiidae	Hesperiinae	Agathymus	stephensi				F		F		F
Hesperiidae	Hesperiinae	Megathymus	cofaqui	slotteni, cofaqui	Hesperiidae	Hesperiinae	Megathymus	cofaqui	slotteni, cofaqui	Hesperiidae	Megathyminae	Megathymus	cofaqui		Cofaqui Giant-Skipper	Hesperiidae	Hesperiinae	Megathymus	cofaqui				F		F		F
Hesperiidae	Hesperiinae	Megathymus	streckeri	streckeri, texana, leussleri	Hesperiidae	Hesperiinae	Megathymus	streckeri	streckeri, texana, leussleri	Hesperiidae	Megathyminae	Megathymus	streckeri		Strecker's Giant-Skipper	Hesperiidae	Hesperiinae	Megathymus	streckeri				F		F		F
Hesperiidae	Hesperiinae	Megathymus	ursus	deserti, ursus, violae	Hesperiidae	Hesperiinae	Megathymus	ursus	deserti, ursus, violae	Hesperiidae	Megathyminae	Megathymus	ursus		Ursine Giant-Skipper	Hesperiidae	Hesperiinae	Megathymus	ursus				F		F		F
Hesperiidae	Hesperiinae	Megathymus	yuccae	coloradensis, harbisoni, louiseae, martini, navajo, reinthali, reubeni, wilsonorum, yuccae	Hesperiidae	Hesperiinae	Megathymus	yuccae	coloradensis, harbisoni, louiseae, martini, navajo, reinthali, reubeni, wilsonorum, yuccae	Hesperiidae	Megathyminae	Megathymus	yuccae		Yucca Giant-Skipper	Hesperiidae	Hesperiinae	Megathymus	yuccae				F		F		F
Hesperiidae	Hesperiinae	Stallingsia	maculosus		Hesperiidae	Hesperiinae	Stallingsia	maculosus		Hesperiidae	Megathyminae	Stallingsia	maculosa		Manfreda Giant-Skipper	Hesperiidae	Hesperiinae	Stallingsia	maculosus				F		F		F
Hesperiidae	Eudaminae	Achalarus	albociliatus	albociliatus	Hesperiidae	Eudaminae	Achalarus	albociliatus	albociliatus	Hesperiidae	Pyrginae	Achalarus	albociliatus		Skinner's Cloudywing	Hesperiidae	Pyrginae	Achalarus	albociliatus				F	F	F	F
Hesperiidae	Eudaminae	Achalarus	casica		Hesperiidae	Eudaminae	Achalarus	casica		Hesperiidae	Pyrginae	Achalarus	casica		Desert Cloudywing	Hesperiidae	Pyrginae	Achalarus	casica				F	F	F	F
Hesperiidae	Eudaminae	Thessia	jalapus		Hesperiidae	Eudaminae	Thessia	jalapus		Hesperiidae	Pyrginae	Achalarus	jalapus		Jalapus Cloudywing	Hesperiidae	Pyrginae	Thessia	jalapus				F	F	F	F
Hesperiidae	Eudaminae	Achalarus	lyciades		Hesperiidae	Eudaminae	Achalarus	lyciades		Hesperiidae	Pyrginae	Achalarus	lyciades		Hoary Edge	Hesperiidae	Pyrginae	Achalarus	lyciades				F	F	F	F
			N(r)		Hesperiidae	Eudaminae	Achalarus	tehuacana					N(r)						N(r)		Pelham: Recorded from Texas by Hardy et al. (2010), News Lepid. Soc. 52(4): 107-111,127, 18 figs.	N(r)			N(r)	N(r)
Hesperiidae	Eudaminae	Achalarus	toxeus		Hesperiidae	Eudaminae	Achalarus	toxeus		Hesperiidae	Pyrginae	Achalarus	toxeus		Coyote Cloudywing	Hesperiidae	Pyrginae	Achalarus	toxeus				F	F	F	F
Hesperiidae	Pyrginae	Achlyodes	pallida		Hesperiidae	Pyrginae	Achlyodes	pallida					N(?)			Hesperiidae	Pyrginae	Achlyodes	pallida		NABA does not list Achlyodes pallida, but does list Achlyodes thraso		?		?		?
Hesperiidae	Pyrginae	Eantis	tamenund		Hesperiidae	Pyrginae	Eantis	tamenund		Hesperiidae	Pyrginae	Achlyodes	thraso		Sickle-winged Skipper	Hesperiidae	Pyrginae	Eantis	tamenund		NABA: Opler (1999) placed this species in the genus Eantis and treated our northern population, tamenund as distinct from the more southern thraso presumably based upon unpublished work by Andy Warren. Because there is no published basis for changing these names, we retain First Edition status. Vote 4-0.		G, S		G, S		G, S
Hesperiidae	Eudaminae	Aguna	asander	asander	Hesperiidae	Eudaminae	Aguna	asander	asander	Hesperiidae	Pyrginae	Aguna	asander		Gold-spotted Aguna	Hesperiidae	Pyrginae	Aguna	asander				F	F	F	F
Hesperiidae	Eudaminae	Aguna	claxon		Hesperiidae	Eudaminae	Aguna	claxon		Hesperiidae	Pyrginae	Aguna	claxon		Emerald Aguna	Hesperiidae	Pyrginae	Aguna	claxon				F	F	F	F
Hesperiidae	Eudaminae	Aguna	metophis		Hesperiidae	Eudaminae	Aguna	metophis		Hesperiidae	Pyrginae	Aguna	metophis		Tailed Aguna	Hesperiidae	Pyrginae	Aguna	metophis				F	F	F	F
Hesperiidae	Pyrginae	Anastrus	sempiternus	sempiternus	Hesperiidae	Pyrginae	Anastrus	sempiternus	sempiternus				N(r)			Hesperiidae	Pyrginae	Anastrus	sempiternus				N(r)		N(r)		N(r)
Hesperiidae	Pyrginae	Antigonus	emorsa		Hesperiidae	Pyrginae	Antigonus	emorsa		Hesperiidae	Pyrginae	Antigonus	emorsus		White Spurwing	Hesperiidae	Pyrginae	Antigonus	emorsa				L		L		L
Hesperiidae	Pyrginae	Antigonus	erosus		Hesperiidae	Pyrginae	Antigonus	erosus					N(r)						N(r)				L	N(r)	L	N(r)	N(r)
Hesperiidae	Eudaminae	Astraptes	alardus	latia, alardus	Hesperiidae	Eudaminae	Astraptes	alardus	latia				N(r)						N(r)				N(r)	N(r)	N(r)	N(r)
Hesperiidae	Eudaminae	Astraptes	anaphus	anaphus, annetta	Hesperiidae	Eudaminae	Astraptes	anaphus	annetta				N(r)						N(r)				N(r)	N(r)	N(r)	N(r)
Hesperiidae	Eudaminae	Astraptes	egregius	egregius	Hesperiidae	Eudaminae	Astraptes	egregius	egregius	Hesperiidae	Pyrginae	Astraptes	egregius		Small-spotted Flasher	Hesperiidae	Pyrginae	Astraptes	egregius				F	F	F	F
Hesperiidae	Eudaminae	Astraptes	fulgerator	fulgerator, azul	Hesperiidae	Eudaminae	Astraptes	fulgerator	azul	Hesperiidae	Pyrginae	Astraptes	fulgerator		Two-barred Flasher	Hesperiidae	Pyrginae	Astraptes	fulgerator				F	F	F	F
Hesperiidae	Eudaminae	Astraptes	alector	hopfferi	Hesperiidae	Eudaminae	Astraptes	alector	hopfferi	Hesperiidae	Pyrginae	Astraptes	gilberti		Gilbert's Flasher	Hesperiidae	Pyrginae	Astraptes	alector				F	F	F	F
Hesperiidae	Eudaminae	Autochton	cellus		Hesperiidae	Eudaminae	Autochton	cellus		Hesperiidae	Pyrginae	Autochton	cellus		Golden Banded-Skipper	Hesperiidae	Pyrginae	Autochton	cellus				F	F	F	F
Hesperiidae	Eudaminae	Autochton	cincta		Hesperiidae	Eudaminae	Autochton	cincta		Hesperiidae	Pyrginae	Autochton	cincta		Chisos Banded-Skipper	Hesperiidae	Pyrginae	Autochton	cincta				F	F	F	F
Hesperiidae	Eudaminae	Autochton	pseudocellus		Hesperiidae	Eudaminae	Autochton	pseudocellus		Hesperiidae	Pyrginae	Autochton	pseudocellus		Sonoran Banded-Skipper	Hesperiidae	Pyrginae	Autochton	pseudocellus				F	F	F	F
Hesperiidae	Eudaminae	Cabares	potrillo	potrillo	Hesperiidae	Eudaminae	Cabares	potrillo	potrillo	Hesperiidae	Pyrginae	Cabares	potrillo		Potrillo Skipper	Hesperiidae	Pyrginae	Cabares	potrillo				F	F	F	F
Hesperiidae	Eudaminae	Chioides	albofasciatus		Hesperiidae	Eudaminae	Chioides	albofasciatus		Hesperiidae	Pyrginae	Chioides	catillus		White-striped Longtail	Hesperiidae	Pyrginae	Chioides	albofasciatus		O&W: [Raised to species level by Austin and Warren (2002); previously considered to be a subspecies of C. catillus (Cramer, 1779).] ITIS Note: Pelham (2008:427) notes that Chioides catillus (Cramer, 1780) was "Previously considered conspecific with Chioides albofasciatus (Hewitson 1867), Austin and A. Warren (2002:17-18) demonstrated that this is an extralimital taxon" with respect to North Ameri…		F, P	F	F, P	F	P
Hesperiidae	Eudaminae	Chioides	zilpa		Hesperiidae	Eudaminae	Chioides	zilpa		Hesperiidae	Pyrginae	Chioides	zilpa		Zilpa Longtail	Hesperiidae	Pyrginae	Chioides	zilpa				F	F	F	F
Hesperiidae	Pyrginae	Chiomara	georgina	georgina, pelagica	Hesperiidae	Pyrginae	Chiomara	georgina	georgina	Hesperiidae	Pyrginae	Chiomara	asychis	(includes georgina)	White-patched Skipper	Hesperiidae	Pyrginae	Chiomara	georgina		O&W: [Chiomara asychis (Stoll, 1780) is a South American species that does not occur in Costa Rica (Janzen et al. 1998) or Mexico (Warren 2000, 2002); however, its relationship to georgina is currently being studied in detail by G. Austin and ADW.] NABA: Jansen et al (1998) treated georgina (Central America) as distinct from asychis (South American) without presenting data to support this treatme…		P		P		P
Hesperiidae	Eudaminae	Codatractus	alcaeus	alcaeus	Hesperiidae	Eudaminae	Codatractus	alcaeus	alcaeus	Hesperiidae	Pyrginae	Codatractus	alcaeus		White-crescent Longtail	Hesperiidae	Pyrginae	Codatractus	alcaeus				F	F	F	F
Hesperiidae	Eudaminae	Codatractus	arizonensis		Hesperiidae	Eudaminae	Codatractus	arizonensis		Hesperiidae	Pyrginae	Codatractus	arizonensis		Arizona Skipper	Hesperiidae	Pyrginae	Codatractus	arizonensis				F	F	F	F
Hesperiidae	Eudaminae	Codatractus	valeriana		Hesperiidae	Eudaminae	Codatractus	valeriana		Hesperiidae	Pyrginae	Codatractus	mysie		Valeriana Skipper	Hesperiidae	Pyrginae	Codatractus	mysie		O&W: [mysie] was placed in Codatractus by Burns (1996). OW excludes [Thorybes] valeriana from NA list, saying: Our records refer to Codatractus mysie (see Burns 1996); however the identity of valeriana remains a mystery. Pelham reports Original Combination=Thorybes mysie		F, S	F, S	F, S	F, S
Hesperiidae	Eudaminae	Cogia	caicus	moschus, caicus	Hesperiidae	Eudaminae	Cogia	caicus	moschus	Hesperiidae	Pyrginae	Cogia	caicus		Gold-costa Skipper	Hesperiidae	Pyrginae	Cogia	caicus				F	F	F	F
Hesperiidae	Eudaminae	Cogia	calchas		Hesperiidae	Eudaminae	Cogia	calchas		Hesperiidae	Pyrginae	Cogia	calchas		Mimosa Skipper	Hesperiidae	Pyrginae	Cogia	calchas				F	F	F	F
Hesperiidae	Eudaminae	Cogia	hippalus	hippalus	Hesperiidae	Eudaminae	Cogia	hippalus	hippalus	Hesperiidae	Pyrginae	Cogia	hippalus		Acacia Skipper	Hesperiidae	Pyrginae	Cogia	hippalus				F	F	F	F
Hesperiidae	Eudaminae	Cogia	outis		Hesperiidae	Eudaminae	Cogia	outis		Hesperiidae	Pyrginae	Cogia	outis		Outis Skipper	Hesperiidae	Pyrginae	Cogia	outis				F	F	F	F
Hesperiidae	Eudaminae	Epargyreus	clarus	clarus, huachuca, profugus, californicus	Hesperiidae	Eudaminae	Epargyreus	clarus	clarus, huachuca, profugus, californicus	Hesperiidae	Pyrginae	Epargyreus	clarus		Silver-spotted Skipper	Hesperiidae	Pyrginae	Epargyreus	clarus		O&W: [Epargyreus aspina Evans, 1952* could possibly also stray into our area; dissection of all exotic Epargyreus specimens in our area is needed to confirm their specific identity.]		F	F	F	F
Hesperiidae	Eudaminae	Epargyreus	exadeus	cruza	Hesperiidae	Eudaminae	Epargyreus	exadeus	cruza	Hesperiidae	Pyrginae	Epargyreus	exadeus		Broken Silverdrop	Hesperiidae	Pyrginae	Epargyreus	exadeus		O&W: [Arizona records of “exadeus” almost certainly refer to E. windi H.A. Freeman, 1969* (a resident of central Sonora, Mexico), but specimens have not been examined. exadeus is unknown in western Mexico north of Nayarit (ADW, unpublished). Epargyreus aspina Evans, 1952* could possibly also stray into our area; dissection of all exotic Epargyreus specimens in our area is needed to confirm their …		F	F	F	F
Hesperiidae	Eudaminae	Epargyreus	zestos	zestos	Hesperiidae	Eudaminae	Epargyreus	zestos	zestos	Hesperiidae	Pyrginae	Epargyreus	zestos		Zestos Skipper	Hesperiidae	Pyrginae	Epargyreus	zestos		O&W: [Epargyreus aspina Evans, 1952* could possibly also stray into our area; dissection of all exotic Epargyreus specimens in our area is needed to confirm their specific identity.]		F	F	F	F
Hesperiidae	Pyrginae	Gesta	invisus		Hesperiidae	Pyrginae	Gesta	invisus		Hesperiidae	Pyrginae	Gesta	gesta	(includes invisus)	False Duskywing	Hesperiidae	Pyrginae	Gesta	invisus		NABA: Opler (1999) treated gesta and invisus as distinct species. Because there is no published information supporting this treatment, we retain First Edition status. Pelham: Austin and A. Warren (2002), Dugesiana 9(2): 30, and other recent authors, treated G. invisus as a species-level taxon.		P		P		P
Hesperiidae	Pyrginae	Heliopyrgus	domicella	domicella	Hesperiidae	Pyrginae	Heliopyrgus	domicella	domicella	Hesperiidae	Pyrginae	Heliopetes	domicella		Erichson's White-Skipper	Hesperiidae	Pyrginae	Heliopyrgus	domicella		O&W: [Treatment of Heliopyrgus is based on Austin & Warren (2001); also see Mielke & Casagrande (2002).]		G		G		G
Hesperiidae	Pyrginae	Heliopyrgus	sublinea		Hesperiidae	Pyrginae	Heliopyrgus	sublinea					N(r)						N(r)				N(r)	N(r)	N(r)	N(r)
Hesperiidae	Pyrginae	Hesperopsis	gracielae		Hesperiidae	Pyrginae	Hesperopsis	gracielae		Hesperiidae	Pyrginae	Hesperopsis	alpheus	gracielae	MacNeill's' Saltbush Sootywing	Hesperiidae	Pyrginae	Hesperopsis	gracielae				P		P		P
Hesperiidae	Pyrginae	Mylon	pelopidas		Hesperiidae	Pyrginae	Mylon	pelopidas					N(r)						N(r)		Pelham: Recorded from Arizona by K. Davis et al. (2005), News Lepid. Soc. 47(4): 103, 104. Rare stray?		N(r)	N(r)	N(r)	N(r)
Hesperiidae	Eudaminae	Phocides	belus		Hesperiidae	Eudaminae	Phocides	belus					N(r)			Hesperiidae	Pyrginae	Phocides	belus		Pelham: recorded from Texas by Hanson et al. 2003. Rare stray		N(r)	F	N(r)	F	N(r)
Hesperiidae	Eudaminae	Phocides	pigmalion	okeechobee	Hesperiidae	Eudaminae	Phocides	pigmalion	okeechobee	Hesperiidae	Pyrginae	Phocides	pigmalion		Mangrove Skipper	Hesperiidae	Pyrginae	Phocides	pigmalion				F	F	F	F
Hesperiidae	Eudaminae	Phocides	polybius	lilea	Hesperiidae	Eudaminae	Phocides	polybius	lilea	Hesperiidae	Pyrginae	Phocides	polybius		Guava Skipper	Hesperiidae	Pyrginae	Phocides	polybius				F	F	F	F
Hesperiidae	Pyrginae	Pholisora	mejicanus		Hesperiidae	Pyrginae	Pholisora	mejicanus		Hesperiidae	Pyrginae	Pholisora	mejicana		Mexican Sootywing	Hesperiidae	Pyrginae	Pholisora	mejicanus		spelling. NABA error?		L		L		L
Hesperiidae	Eudaminae	Polygonus	leo	arizonensis, leo, histrio, pallida	Hesperiidae	Eudaminae	Polygonus	leo	arizonensis, histrio	Hesperiidae	Pyrginae	Polygonus	leo		Hammock Skipper	Hesperiidae	Pyrginae	Polygonus	leo				F	F	F	F
Hesperiidae	Eudaminae	Polygonus	savigny	savigny	Hesperiidae	Eudaminae	Polygonus	savigny	savigny	Hesperiidae	Pyrginae	Polygonus	manueli		Manuel's Skipper	Hesperiidae	Pyrginae	Polygonus	savigny		Synonymy. O&W: [Mielke & Casagrande (2002) treat manueli Bell & W.P. Comstock, 1948 as a junior synonym of savigny; also see Mielke (in press).] Pelham: Lectotype in MNHP, designated by Mielke and Casagrande (2002), Revta. bras. Zool. 19(supl. 1): 40. The lectotype is conspecific with Polygonus manueli, as determined by Mielke and Casagrande (2002), ibid., so the name savigny must be given priori…		F, S	F	F, S	F	S
Hesperiidae	Eudaminae	Polythrix	mexicanus		Hesperiidae	Eudaminae	Polythrix	mexicanus		Hesperiidae	Pyrginae	Polythrix	mexicanus		Mexican Longtail	Hesperiidae	Pyrginae	Polythrix	mexicanus				F	F	F	F
Hesperiidae	Eudaminae	Polythrix	octomaculata		Hesperiidae	Eudaminae	Polythrix	octomaculata		Hesperiidae	Pyrginae	Polythrix	octomaculata		Eight-spotted Longtail	Hesperiidae	Pyrginae	Polythrix	octomaculata				F	F	F	F
Hesperiidae	Eudaminae	Proteides	mercurius	mercurius, sanantonio	Hesperiidae	Eudaminae	Proteides	mercurius	mercurius, sanantonio	Hesperiidae	Pyrginae	Proteides	mercurius		Mercurial Skipper	Hesperiidae	Pyrginae	Proteides	mercurius				F	F	F	F
Hesperiidae	Pyrginae	Sostrata	nordica		Hesperiidae	Pyrginae	Sostrata	nordica		Hesperiidae	Pyrginae	Sostrata	bifasciata		Blue-studded Skipper	Hesperiidae	Pyrginae	Sostrata	nordica		O&W: [Treatment (of nordica) as a full species follows Warren (2000, 2002); S. bifasciata (Ménétriés, 1829) is a South American species. The relationship between these two taxa is currently being studied in detail by G.T. Austin and ADW.] **We assume NABA considers S. bifasciata as containing nordica - No comment in NABA.		P		P		P
Hesperiidae	Eudaminae	Spathilepia	clonius		Hesperiidae	Eudaminae	Spathilepia	clonius		Hesperiidae	Pyrginae	Spathilepia	clonius		Falcate Skipper	Hesperiidae	Pyrginae	Spathilepia	clonius				F	F	F	F
Hesperiidae	Eudaminae	Thorybes	bathyllus		Hesperiidae	Eudaminae	Thorybes	bathyllus		Hesperiidae	Pyrginae	Thorybes	bathyllus		Southern Cloudywing	Hesperiidae	Pyrginae	Thorybes	bathyllus				F	F	F	F
Hesperiidae	Eudaminae	Thorybes	confusis		Hesperiidae	Eudaminae	Thorybes	confusis		Hesperiidae	Pyrginae	Thorybes	confusis		Confused Cloudywing	Hesperiidae	Pyrginae	Thorybes	confusis				F	F	F	F
Hesperiidae	Eudaminae	Thorybes	diversus		Hesperiidae	Eudaminae	Thorybes	diversus		Hesperiidae	Pyrginae	Thorybes	diversus		Western Cloudywing	Hesperiidae	Pyrginae	Thorybes	diversus				F	F	F	F
Hesperiidae	Eudaminae	Thorybes	drusius		Hesperiidae	Eudaminae	Thorybes	drusius		Hesperiidae	Pyrginae	Thorybes	drusius		Drusius Cloudywing	Hesperiidae	Pyrginae	Thorybes	drusius				F	F	F	F
Hesperiidae	Eudaminae	Thorybes	mexicana	aemilea, nevada, blanca, mexicana, dobra	Hesperiidae	Eudaminae	Thorybes	mexicana	aemilea, nevada, blanca, dobra	Hesperiidae	Pyrginae	Thorybes	mexicanus		Mexican Cloudywing	Hesperiidae	Pyrginae	Thorybes	mexicana				F, L	F	F, L	F	L
Hesperiidae	Eudaminae	Thorybes	pylades	pylades, indistinctus, albosuffusa	Hesperiidae	Eudaminae	Thorybes	pylades	pylades, indistinctus, albosuffusa	Hesperiidae	Pyrginae	Thorybes	pylades		Northern Cloudywing	Hesperiidae	Pyrginae	Thorybes	pylades				F	F	F	F
Hesperiidae	Pyrginae	Timochares	ruptifasciata		Hesperiidae	Pyrginae	Timochares	ruptifasciatus		Hesperiidae	Pyrginae	Timochares	ruptifasciatus		Brown-banded Skipper	Hesperiidae	Pyrginae	Timochares	ruptifasciata			L	L			L	L
Hesperiidae	Eudaminae	Typhedanus	undulatus		Hesperiidae	Eudaminae	Typhedanus	undulatus		Hesperiidae	Pyrginae	Typhedanus	undulatus		Mottled Longtail	Hesperiidae	Pyrginae	Typhedanus	undulatus				F	F	F	F
Hesperiidae	Eudaminae	Urbanus	belli		Hesperiidae	Eudaminae	Urbanus	belli		Hesperiidae	Pyrginae	Urbanus	belli		Double-striped Longtail	Hesperiidae	Pyrginae	Urbanus	belli				F	F	F	F
Hesperiidae	Eudaminae	Urbanus	dorantes	dorantes	Hesperiidae	Eudaminae	Urbanus	dorantes	dorantes	Hesperiidae	Pyrginae	Urbanus	dorantes		Dorantes Longtail	Hesperiidae	Pyrginae	Urbanus	dorantes				F	F	F	F
Hesperiidae	Eudaminae	Urbanus	doryssus	doryssus, santiago	Hesperiidae	Eudaminae	Urbanus	doryssus	doryssus	Hesperiidae	Pyrginae	Urbanus	doryssus		White-tailed Longtail	Hesperiidae	Pyrginae	Urbanus	doryssus				F	F	F	F
Hesperiidae	Eudaminae	Urbanus	esmeraldus		Hesperiidae	Eudaminae	Urbanus	esmeraldus		Hesperiidae	Pyrginae	Urbanus	esmeraldus		Esmeralda Longtail	Hesperiidae	Pyrginae	Urbanus	esmeraldus				F	F	F	F
Hesperiidae	Eudaminae	Urbanus	procne		Hesperiidae	Eudaminae	Urbanus	procne		Hesperiidae	Pyrginae	Urbanus	procne		Brown Longtail	Hesperiidae	Pyrginae	Urbanus	procne				F	F	F	F
Hesperiidae	Eudaminae	Urbanus	pronus		Hesperiidae	Eudaminae	Urbanus	pronus		Hesperiidae	Pyrginae	Urbanus	pronus		Pronus Longtail	Hesperiidae	Pyrginae	Urbanus	pronus				F	F	F	F
Hesperiidae	Eudaminae	Urbanus	proteus	proteus	Hesperiidae	Eudaminae	Urbanus	proteus	proteus	Hesperiidae	Pyrginae	Urbanus	proteus		Long-tailed Skipper	Hesperiidae	Pyrginae	Urbanus	proteus				F	F	F	F
Hesperiidae	Eudaminae	Urbanus	simplicius		Hesperiidae	Eudaminae	Urbanus	simplicius		Hesperiidae	Pyrginae	Urbanus	simplicius		Plain Longtail	Hesperiidae	Pyrginae	Urbanus	simplicius				F	F	F	F
Hesperiidae	Eudaminae	Urbanus	tanna		Hesperiidae	Eudaminae	Urbanus	tanna		Hesperiidae	Pyrginae	Urbanus	tanna		Tanna Longtail	Hesperiidae	Pyrginae	Urbanus	tanna				F	F	F	F
Hesperiidae	Eudaminae	Urbanus	teleus		Hesperiidae	Eudaminae	Urbanus	teleus		Hesperiidae	Pyrginae	Urbanus	teleus		Teleus Longtail	Hesperiidae	Pyrginae	Urbanus	teleus				F	F	F	F
Hesperiidae	Pyrginae	Windia	windi		Hesperiidae	Pyrginae	Windia	windi					N(?)			Hesperiidae	Pyrginae	Windia	windi				N(r)		N(r)		N(r)
Hesperiidae	Eudaminae	Zestusa	dorus		Hesperiidae	Eudaminae	Zestusa	dorus		Hesperiidae	Pyrginae	Zestusa	dorus		Short-tailed Skipper	Hesperiidae	Pyrginae	Zestusa	dorus				F	F	F	F
Hesperiidae	Pyrginae	Apyrrothrix	araxes	arizonae	Hesperiidae	Pyrginae	Apyrrothrix	araxes	arizonae	Hesperiidae	Pyrrhopyginae	Pyrrhopyge	araxes		Dull Firetip	Hesperiidae	Pyrrhopyginae	Apyrrothrix	araxes				F, G	F	F, G	F	G
																				Totals nymphalids	F	50	23	4	73	54	19
																					G	1	4	2	4	4	1
																					S	2	12	3	14	5	9
																					P	0	15	2	15	2	13
																					L	0	1	0	1	0	1
																					N	7	3	1	10	8	2
																					N(r)	7	3	1	10	8	2
																					N(?)	0	0	0	0	0	0
																					N(n)	0	0	0	0	0	0
																					All	60	58	12	117	73	45
																					S+P	2	27	5	29	7	22
																					total G+S+P+L+N (no F)	10	35	8	44	19	26
																				Totals lycaenids	F	0	0	147	0	148	144
																					G	14	14	0	20	13	14
																					S	0	5	1	6	2	3
																					P	6	24	7	27	15	20
																					L	0	4	1	4	1	3
																					N	7	5	4	10	9	3
																					N(r)	5	2	1	7	6	1
																					N(?)	0	2	2	2	2	2
																					N(n)	2	1	1	1	1	0
																					All	27	52	160	67	188	187
																					S+P	6	29	8	33	17	23
																					total G+S+P+L+N (no F)	27	52	13	67	40	43
																				Totals riodinids	F	0	0	0	0	0	0
																					G	0	0	0	0	0	0
																					S	0	1	0	1	0	1
																					P	0	5	0	5	0	5
																					L	0	0	0	0	0	0
																					N	1	1	0	2	1	1
																					N(r)	1	1	0	2	1	1
																					N(?)	0	0	0	0	0	0
																					N(n)	0	0	0	0	0	0
																					All	1	7	0	8	1	7
																					S+P	0	6	0	6	0	6
																					total G+S+P+L+N (no F)	1	7	0	8	1	7
																				Totals pierids	F	0	0	0	0	0	0
																					G	0	8	0	8	0	8
																					S	0	2	0	2	0	2
																					P	1	6	4	7	5	10
																					L	0	2	0	2	0	2
																					N	3	5	5	8	6	4
																					N(r)	2	5	4	7	4	3
																					N(?)	0	0	1	0	1	1
																					N(n)	1	0	0	1	1	0
																					All	4	23	9	27	11	26
																					S+P	1	8	4	9	5	12
																					total G+S+P+L+N (no F)	4	23	9	27	11	26
																				Totals papilionids	F	0	0	0	0	0	0
																					G	0	0	0	0	0	0
																					S	1	0	0	1	1	0
																					P	0	2	0	2	0	2
																					L	0	0	0	0	0	0
																					N	1	3	2	3	3	2
																					N(r)	1	2	1	3	2	1
																					N(?)	0	1	1	0	1	1
																					N(n)	0	0	0	0	0	0
																					All	2	5	2	6	4	4
																					S+P	1	2	0	3	1	2
																					total G+S+P+L+N (no F)	2	5	2	6	4	4
																				Totals hesperids	F	0	68	55	68	55	14
																					G	0	3	0	3	0	3
																					S	1	11	2	12	2	10
																					P	1	10	0	11	1	10
																					L	1	6	1	5	2	5
																					N	1	9	5	10	6	6
																					N(r)	1	8	5	9	6	5
																					N(?)	0	1	0	1	0	1
																					N(n)	0	0	0	0	0	0
																					All	4	107	63	109	66	48
																					S+P	2	21	2	23	3	20
																					total G+S+P+L+N (no F)	4	39	8	41	11	34
																				Total all families	F	50	91	206	141	257	177
																					G	15	29	2	35	17	26
																					S+P	12	93	19	103	33	85
																					L	1	13	2	12	3	11
																					N	20	26	17	43	33	18
																					All	98	252	246	334	343	317
																					All except F	48	161	40	193	86	140
																				Table 4				Totals
																						F	G	S+P (=S)	L	N	All	All except F
																					ITIS-Pelham	50	15	12	1	20	98	48
																					ITIS-NABA	91	29	93	13	26	252	161
																					ITIS-O&W	206	2	19	2	17	246	40
																					Pelham-NABA	141	35	103	12	43	334	193
																					Pelham-O&W	257	17	33	3	33	343	86
																					NABA-O&W	177	26	85	11	18	317	140
