# Supplementary material for: A novel curation system to facilitate data integration across regional citizen science survey programs
Source: PeerJ. 2020 Jul 29;8:e9219. doi: 10.7717/peerj.9219 (PMC7395600; doi:10.7717/peerj.9219)
Supplement: Supplemental Information 4 — Program taxa lists are given in each column (base list in parentheses). The type of match/mismatch is characterized in the first column as: Perfect Match (taxon name is the same across all the programs monitoring that taxon; number of programs including them in parentheses); Synonym (same concept, different species or genus name, as indicated); Single program (only one program lists this taxon); Complex: multiple taxa (subspecies) are part of a species concept; Conglomerate: programs monitor two species as one because of difficulty distinguishing in the field. Names of all taxa involved in the mismatch are listed in column 2 (headed "group"). [file peerj-08-9219-s004.xlsx]

## Sheet: S2 - Program alignment
Match or Mismatch type	Group	Illinois (NABA)	Iowa (NABA)	Michigan (NABA)	Ohio (NABA)	Tennessee (NABA)	Florida (O&W)	Cascades (Pelham)	MPG ranch (Pelham)	Colorado (O&W)	Irvine Ranch (O&W)	Notes
Synonym (Genus)	Eur-Ab nicippe	Eurema nicippe	Eurema nicippe		Eurema nicippe	Abaeis nicippe	Abaeis nicippe			Abaeis nicippe	Abaeis nicippe
Complex	eulalia-californica-bredowii									Adelpha eulalia	Adelpha bredowii
Complex	eulalia-californica-bredowii							Adelpha californica
Perfect match	NA	Achalarus lyciades	Achalarus lyciades	Achalarus lyciades	Achalarus lyciades	Achalarus lyciades	Achalarus lyciades
Multiple: Synonym (Genus), spelling	Nym-Ag milberti-milbertii	Nymphalis milbertii	Nymphalis milbertii	Nymphalis milberti	Nymphalis milberti			Nymphalis milberti	Aglais milberti	Nymphalis milberti
Perfect match	NA	Agraulis vanillae	Agraulis vanillae		Agraulis vanillae	Agraulis vanillae	Agraulis vanillae			Agraulis vanillae	Agraulis vanillae
Synonym (Genus)	Agriades-Plebejus glandon							Agriades glandon		Plebejus glandon
Single program	NA									Amblyscirtes aenus
Perfect match (4)	NA	Amblyscirtes aesculapius			Amblyscirtes aesculapius	Amblyscirtes aesculapius	Amblyscirtes aesculapius
Single program	NA						Amblyscirtes alternata
Perfect match (4)	NA	Amblyscirtes belli			Amblyscirtes belli	Amblyscirtes belli	Amblyscirtes belli
Single program	NA	Amblyscirtes carolina
Perfect match	NA	Amblyscirtes hegon	Amblyscirtes hegon	Amblyscirtes hegon	Amblyscirtes hegon	Amblyscirtes hegon	Amblyscirtes hegon
Perfect match (2)	NA	Amblyscirtes linda				Amblyscirtes linda
Single program	NA									Amblyscirtes oslari
Single program	NA									Amblyscirtes phylace
Perfect match (3)	NA	Amblyscirtes reversa				Amblyscirtes reversa	Amblyscirtes reversa
Single program	NA									Amblyscirtes simius
Perfect match (9)	NA	Amblyscirtes vialis	Amblyscirtes vialis	Amblyscirtes vialis	Amblyscirtes vialis	Amblyscirtes vialis	Amblyscirtes vialis	Amblyscirtes vialis	Amblyscirtes vialis	Amblyscirtes vialis
Perfect match (7)	NA	Anaea andria	Anaea andria	Anaea andria	Anaea andria	Anaea andria	Anaea andria			Anaea andria
Single program	NA						Anaea troglodyta floridalis
Single program	NA						Anartia chrysopelea
Single program	NA						Anartia jatrophae
Perfect match (7)	NA	Anatrytone logan	Anatrytone logan	Anatrytone logan	Anatrytone logan	Anatrytone logan	Anatrytone logan			Anatrytone logan
Perfect match (7)	NA	Ancyloxypha numitor	Ancyloxypha numitor	Ancyloxypha numitor	Ancyloxypha numitor	Ancyloxypha numitor	Ancyloxypha numitor			Ancyloxypha numitor
Single program	NA						Anteos maerula
Single program	NA						Anthanassa frisia
Perfect match (2)	NA						Anthanassa texana			Anthanassa texana
Perfect match (5)	NA	Anthocharis midea		Anthocharis midea	Anthocharis midea	Anthocharis midea	Anthocharis midea
Complex	sara-thoosa-julia									Anthocharis julia
Complex	sara-thoosa-julia							Anthocharis sara	Anthocharis sara		Anthocharis sara	Stout"s (2018) geographical distribution of subspecies indicates that the Cascades program A. sara monitors subspecies sara and julia; MPG, A. sara monitors subspecies julia; and Irvine Ranch monitors A. sara subspecies sara.
Complex	sara-thoosa-julia									Anthocharis thoosa
Single program	NA						Aphrissa neleis
Single program	NA						Aphrissa orbis
Single program	NA						Aphrissa statira
Single program	NA						Appias drusilla
Perfect match (2)	NA							Apodemia mormo		Apodemia mormo
Single program	NA									Apodemia nais
Single program	NA										Apodemia virgulti
Single program	NA						Asbolis capucinus
Single program	NA						Ascia monuste
Perfect match (7)	NA	Asterocampa celtis	Asterocampa celtis	Asterocampa celtis	Asterocampa celtis	Asterocampa celtis	Asterocampa celtis			Asterocampa celtis
Perfect match (6)	NA	Asterocampa clyton	Asterocampa clyton	Asterocampa clyton	Asterocampa clyton	Asterocampa clyton	Asterocampa clyton
Perfect match (9)	NA	Atalopedes campestris	Atalopedes campestris	Atalopedes campestris	Atalopedes campestris	Atalopedes campestris	Atalopedes campestris	Atalopedes campestris		Atalopedes campestris	Atalopedes campestris
Perfect match (6)	NA	Atlides halesus			Atlides halesus	Atlides halesus	Atlides halesus			Atlides halesus	Atlides halesus
Perfect match (5)	NA	Atrytone arogos	Atrytone arogos		Atrytone arogos		Atrytone arogos			Atrytone arogos
Perfect match (7)	NA	Atrytonopsis hianna	Atrytonopsis hianna	Atrytonopsis hianna	Atrytonopsis hianna	Atrytonopsis hianna	Atrytonopsis hianna			Atrytonopsis hianna
Single program	NA						Atrytonopsis loammi
Perfect match (4)	NA	Autochton cellus			Autochton cellus	Autochton cellus	Autochton cellus
Single program	NA									Atrytonopsis vierecki
Perfect match (8)	NA	Battus philenor	Battus philenor	Battus philenor	Battus philenor	Battus philenor	Battus philenor			Battus philenor	Battus philenor
Single program	NA						Battus polydamas
Single program	NA							Boloria astarte
Perfect match (7)	NA	Boloria bellona	Boloria bellona	Boloria bellona	Boloria bellona	Boloria bellona		Boloria bellona		Boloria bellona
Perfect match (3)	NA							Boloria chariclea	Boloria chariclea	Boloria chariclea
Perfect match (2)	NA			Boloria eunomia						Boloria eunomia
Single program	NA							Boloria epithore
Perfect match (2)	NA							Boloria freija		Boloria freija
Single program	NA									Boloria frigga
Perfect match (7)	NA	Boloria selene	Boloria selene	Boloria selene	Boloria selene			Boloria selene	Boloria selene	Boloria selene
Perfect match (3)	NA							Brephidium exilis		Brephidium exilis	Brephidium exilis
Single program	NA						Brephidium pseudofea
Single program	NA				Calephelis borealis
Perfect match (3)	NA	Calephelis multicum		Calephelis muticum	Calephelis muticum
Single program	NA										Calephelis nemesis
Single program	NA						Calephelis virginiensis
Single program	NA										Calephelis wrighti
Complex	affinis-perplexa							Callophrys affinis		Callophrys affinis
Perfect match (8)	NA			Callophrys augustinus	Callophrys augustinus	Callophrys augustinus	Callophrys augustinus	Callophrys augustinus	Callophrys augustinus	Callophrys augustinus	Callophrys augustinus
Single program	NA							Callophrys dumetorum			Callophrys perplexa	O&W considers perplexa a distinct species. Pelham considers it a subspecies of dumetorum. The only "dumetorum subspecies" in Cascades is perplexa so these are compatible.
Perfect match (3)	NA							Callophrys eryphon	Callophrys eryphon	Callophrys eryphon
Single program	NA									Callophrys fotis
Perfect match (8)	NA	Callophrys gryneus	Callophrys gryneus	Callophrys gryneus	Callophrys gryneus	Callophrys gryneus	Callophrys gryneus	Callophrys gryneus		Callophrys gryneus		Cascades (Pelham) = The entity at Cascades is Callophrys gryneus nelsoni. O&W considers this Callophrys nelsoni. Thus, O&W-based lists (Florida, Irvine or Colorado) would consider Cascades "C. gryneus" to be C. nelsoni, and not compatible from Cascades.
Perfect match (6)	NA	Callophrys henrici	Callophrys henrici	Callophrys henrici	Callophrys henrici	Callophrys henrici	Callophrys henrici
Single program	NA						Callophrys hesseli
Perfect match (5)	NA	Callophrys irus		Callophrys irus	Callophrys irus	Callophrys irus	Callophrys irus
Single program	NA							Callophrys johnsoni
Perfect match (3)	NA							Callophrys mossii	Callophrys mossii	Callophrys mossii
Perfect match (5)	NA	Callophrys niphon		Callophrys niphon	Callophrys niphon	Callophrys niphon	Callophrys niphon
Perfect match (6)	NA	Callophrys polios		Callophrys polios	Callophrys polios			Callophrys polios	Callophrys polios	Callophrys polios
Perfect match (3)	NA							Callophrys sheridanii	Callophrys sheridanii	Callophrys sheridanii
Perfect match (3)	NA							Callophrys spinetorum	Callophrys spinetorum	Callophrys spinetorum
Perfect match (3)	NA				Calpodes ethlius	Calpodes ethlius	Calpodes ethlius
Perfect match (4)	NA	Calycopis cecrops			Calycopis cecrops	Calycopis cecrops	Calycopis cecrops
Perfect match (3)	NA			Carterocephalus palaemon				Carterocephalus palaemon	Carterocephalus palaemon
Multiple issues	echo/humulus/ladon/lucia/neglecta	Celastrina ladon/neglecta	Celastrina ladon	Celastrina ladon/neglecta	Celastrina ladon	Celastrina ladon/neglecta		Celastrina echo	Celastrina echo		Celastrina ladon echo
Multiple issues	echo/humulus/ladon/lucia/neglecta									Celastrina humulus
Multiple issues	echo/humulus/ladon/neglecta/lucia						Celastrina ladon			Celastrina ladon
Multiple issues	echo/humulus/ladon/neglecta/lucia							Celastrina lucia
Multiple issues	echo/humulus/ladon/neglecta/lucia				Celastrina neglecta		Celastrina neglecta			Celastrina neglecta
Perfect match (2)	NA				Celastrina neglectamajor	Celastrina neglectamajor
Perfect match (3)	NA	Celastrina nigra			Celastrina nigra	Celastrina nigra
Single program	NA									Cercyonis meadii
Perfect match (3)	NA							Cercyonis oetus	Cercyonis oetus	Cercyonis oetus
Perfect match (9)	NA	Cercyonis pegala	Cercyonis pegala	Cercyonis pegala	Cercyonis pegala	Cercyonis pegala	Cercyonis pegala	Cercyonis pegala	Cercyonis pegala	Cercyonis pegala
Neutral subspecies	NA							Cercyonis sthenele		Cercyonis sthenele	Cercyonis sthenele silvestris
Single program	NA						Chlorostrymon maesites
Single program	NA						Chlorostrymon simaethis
Perfect match (2)	NA							Chlosyne acastus		Chlosyne acastus
Single program	NA									Chlosyne fulvia
Single program	NA										Chlosyne gabbii
Perfect match (6)	NA	Chlosyne gorgone	Chlosyne gorgone	Chlosyne gorgone	Chlosyne gorgone	Chlosyne gorgone				Chlosyne gorgone
Perfect match (2)	NA			Chlosyne harrisii	Chlosyne harrisii
Single program	NA							Chlosyne hoffmanni
Single program	NA									Chlosyne lacinia
Perfect match (2)	NA									Chlosyne leanira	Chlosyne leanira
Perfect match (7)	NA	Chlosyne nycteis	Chlosyne nycteis	Chlosyne nycteis	Chlosyne nycteis	Chlosyne nycteis	Chlosyne nycteis			Chlosyne nycteis
Perfect match (3)	NA							Chlosyne palla	Chlosyne palla	Chlosyne palla
Single program	NA									Chlosyne whitneyi
Neutral subspecies	NA		Coenonympha tullia	Coenonympha tullia	Coenonympha tullia			Coenonympha tullia	Coenonympha tullia	Coenonympha tullia	Coenonympha tullia california
Neutral subspecies	NA							Colias alexandra	Colias alexandra	Colias alexandra	Colias alexandra harfordii	NABA considers harfordii a subspecies, Pelham/O&W consider it a full species. Harfordii is found only in S. Calif.
Synonym (Genus)	NA	Colias cesonia	Colias cesonia	Colias cesonia	Colias cesonia	Zerene cesonia	Zerene cesonia			Zerene cesonia
Conglomerate	eurytheme/philodice	Colias eurytheme/philodice	Colias eurytheme	Colias eurytheme	Colias eurytheme	Colias eurytheme/philodice	Colias eurytheme	Colias eurytheme	Colias eurytheme	Colias eurytheme	Colias eurytheme
Conglomerate	eurytheme/philodice		Colias philodice	Colias philodice	Colias philodice		Colias philodice	Colias philodice	Colias philodice	Colias philodice
Perfect match (4)	NA			Colias interior	Colias interior			Colias interior	Colias interior
Single program	NA									Colias meadii
Single program	NA							Colias nastes
Single program	NA							Colias occidentalis
Single program	NA									Colias scudderi
Single program	NA									Copaeodes aurantiaca
Synonym (Spelling)	minim(a/us)				Copaeodes minimus		Copaeodes minima
Perfect match (3)	NA							Cupido amyntula		Cupido amyntula	Cupido amyntula
Synonym (Genus)	Everes-Cupido	Everes comyntas	Everes comyntas	Everes comyntas	Everes comyntas	Cupido comyntas	Cupido comyntas	Cupido comyntas		Cupido comyntas
Single program	NA						Cyclargus ammon
Single program	NA						Cyclargus thomasi
Perfect match (4)	NA	Cyllopsis gemma			Cyllopsis gemma	Cyllopsis gemma	Cyllopsis gemma
Single program	NA									Cyllopsis pertepida
Single program	NA						Cymaenes tripunctus
Single program	NA						Danaus eresimus
Perfect match (6)	NA	Danaus gilippus	Danaus gilippus		Danaus gilippus		Danaus gilippus			Danaus gilippus	Danaus gilippus
Perfect match (10)	NA	Danaus plexippus	Danaus plexippus	Danaus plexippus	Danaus plexippus	Danaus plexippus	Danaus plexippus	Danaus plexippus	Danaus plexippus	Danaus plexippus	Danaus plexippus
Single program	NA						Dryadula phaetusa
Single program	NA						Dryas iulia
Synonym (Genus)	Hemiargus-Echinargus	Hemiargus isola	Echinargus isola	Hemiargus isola	Hemiargus isola	Echinargus isola				Echinargus isola
Single program	NA						Electrostrymon angelia
Single program	NA						Electrostrymon sangala
Perfect match (5)	NA	Enodia anthedon	Enodia anthedon	Enodia anthedon	Enodia anthedon	Enodia anthedon
Perfect match (3)	NA	Enodia creola			Enodia creola	Enodia creola
Perfect match (3)	NA	Enodia portlandia				Enodia portlandia	Enodia portlandia
Perfect match (8)	NA	Epargyreus clarus	Epargyreus clarus	Epargyreus clarus	Epargyreus clarus	Epargyreus clarus	Epargyreus clarus	Epargyreus clarus		Epargyreus clarus
Single program	NA						Epargyreus zestos
Single program	NA						Ephyriades brunnea
Single program	NA									Erebia callias
Perfect match (3)	NA							Erebia epipsodea	Erebia epipsodea	Erebia epipsodea
Single program	NA									Erebia magdalena
Single program	NA									Erebia pawlowskii
Single program	NA							Erebia vidleri
Perfect match	NA			Erora laeta	Erora laeta	Erora laeta
Single program	NA									Erynnis afranius
Perfect match (6)	NA	Erynnis baptisiae	Erynnis baptisiae	Erynnis baptisiae	Erynnis baptisiae	Erynnis baptisiae	Erynnis baptisiae
Neutral subspecies	NA	Erynnis brizo	Erynnis brizo	Erynnis brizo	Erynnis brizo brizo	Erynnis brizo	Erynnis brizo			Erynnis brizo
Perfect match (6)	NA	Erynnis funeralis			Erynnis funeralis	Erynnis funeralis	Erynnis funeralis			Erynnis funeralis	Erynnis funeralis
Perfect match (7)	NA	Erynnis horatius	Erynnis horatius	Erynnis horatius	Erynnis horatius	Erynnis horatius	Erynnis horatius			Erynnis horatius
Perfect match (7)	NA	Erynnis icelus	Erynnis icelus	Erynnis icelus	Erynnis icelus	Erynnis icelus		Erynnis icelus		Erynnis icelus
Perfect match (6)	NA	Erynnis juvenalis	Erynnis juvenalis	Erynnis juvenalis	Erynnis juvenalis	Erynnis juvenalis	Erynnis juvenalis
Perfect match (4)	NA	Erynnis lucilius	Erynnis lucilius	Erynnis lucilius	Erynnis lucilius
Perfect match (7)	NA	Erynnis martialis	Erynnis martialis	Erynnis martialis	Erynnis martialis	Erynnis martialis	Erynnis martialis			Erynnis martialis
Perfect match (2)	NA							Erynnis pacuvius		Erynnis pacuvius
Perfect match (5)	NA		Erynnis persius		Erynnis persius			Erynnis persius	Erynnis persius	Erynnis persius
Single program	NA							Erynnis propertius
Single program	NA									Erynnis telemachus
Single program	NA										Erynnis tristis
Perfect match (4)	NA	Erynnis zarucco			Erynnis zarucco	Erynnis zarucco	Erynnis zarucco
Perfect match (3)	NA							Euchloe ausonides	Euchloe ausonides	Euchloe ausonides
Perfect match (3)	NA							Euchloe lotta	Euchloe lotta	Euchloe lotta
Perfect match (6)	NA	Euchloe olympia	Euchloe olympia	Euchloe olympia	Euchloe olympia	Euchloe olympia				Euchloe olympia
Single program	NA						Eumaeus atala
Single program	NA						Eunica monima
Single program	NA						Eunica tatila
Perfect match (2)	NA								Euphilotes ancilla	Euphilotes ancilla
Single program	NA							Euphilotes columbiae				Previously considered a subspecies of enoptes
Perfect match (2)	NA							Euphilotes "enoptes"	Euphilotes "enoptes"
								Euphilotes "battoides" "on-heracleoides"			Euphilotes battoides
Complex	battoides-glaucon								Euphilotes "battoides"			(not glaucon as per Scott (1986), who indicates glaucon does not occur in S. california)
Complex	battoides-glaucon							Euphilotes glaucon	Euphilotes glaucon			O&W species concept includes E. glaucon in battoides (at least, that's how we interpret it. O&W doesn't actually mention glaucon). Pelham (Cascades, MPG) considers E. glaucon distinct from E. battoides, but Irvine Ranch would consider E. glaucon compatible.
Single program	NA									Euphilotes centralis
Single program	NA									Euphilotes ellisi
Single program	NA									Euphilotes rita
Single program	NA									Euphilotes spaldingi
Single program	NA									Euphilotes stanfordorum
Perfect match (3)	NA							Euphydryas anicia	Euphydryas anicia	Euphydryas anicia
Complex	colon-chalcedona							Euphydryas colon	Euphydryas colon		Euphydryas chalcedona	E.chalcedona only occurs in California. O&W considers E. colon to be conspecific with E. Chalcedona. However, Pelham considers chalcedona and colon distinct species. Therefore, Irvine (O&W) would combine E. chalcedona with E. colon from MPG ranch and Cascades BUT MPG ranch (Pelham) and Cascades (Pelham) would NOT combine Irvine chalcedona with their E. colon.
Complex	colon-chalcedona							Euphydryas colon	Euphydryas colon
Perfect match (4)	NA							Euphydryas editha	Euphydryas editha	Euphydryas editha	Euphydryas editha
Perfect match (5)	NA	Euphydryas phaeton	Euphydryas phaeton	Euphydryas phaeton	Euphydryas phaeton	Euphydryas phaeton
Single program	NA						Euphyes arpa
Single program	NA						Euphyes berryi
Perfect match (5)	NA	Euphyes bimacula	Euphyes bimacula	Euphyes bimacula	Euphyes bimacula					Euphyes bimacula
Synonym (Spelling)	conspicua(a/us)	Euphyes conspicuus	Euphyes conspicuus	Euphyes conspicua	Euphyes conspicuus
Perfect match (5)	NA	Euphyes dion	Euphyes dion	Euphyes dion	Euphyes dion	Euphyes dion	Euphyes dion
Perfect match (4)	NA	Euphyes dukesi		Euphyes dukesi	Euphyes dukesi		Euphyes
Single program	NA						Euphyes pilatka
Neutral subspecies	NA	Euphyes vestris	Euphyes vestris	Euphyes vestris	Euphyes vestris	Euphyes vestris	Euphyes vestris	Euphyes vestris		Euphyes vestris	Euphys vestris harbisoni
Perfect match (9)	NA	Euptoieta claudia	Euptoieta claudia	Euptoieta claudia	Euptoieta claudia	Euptoieta claudia	Euptoieta claudia	Euptoieta claudia	Euptoieta claudia	Euptoieta claudia
Single program	NA						Eurema boisduvaliana
Perfect match (2)	NA					Eurema daira	Eurema daira
Synonym (Genus)	Eurema/Pyrisitia	Eurema lisa	Eurema lisa	Eurema lisa	Eurema lisa	Pyrisitia lisa	Pyrisitia lisa			Pyrisitia lisa
Perfect match (5)	NA	Eurema mexicana	Eurema mexicana		Eurema mexicana	Eurema mexicana				Eurema mexicana
Perfect match (7)	NA	Eurytides marcellus	Eurytides marcellus	Eurytides marcellus	Eurytides marcellus	Eurytides marcellus	Eurytides marcellus
Perfect match (6)	NA	Feniseca tarquinius	Feniseca tarquinius	Feniseca tarquinius	Feniseca tarquinius	Feniseca tarquinius	Feniseca tarquinius
Perfect match (9)	NA	Glaucopsyche lygdamus	Glaucopsyche lygdamus	Glaucopsyche lygdamus	Glaucopsyche lygdamus	Glaucopsyche lygdamus		Glaucopsyche lygdamus	Glaucopsyche lygdamus	Glaucopsyche lygdamus	Glaucopsyche lygdamus
Perfect match (3)	NA							Glaucopsyche piasus	Glaucopsyche piasus	Glaucopsyche piasus
Perfect match (2)	NA							Habrodais grunus			Habrodais grunus
Single program	NA						Hamadryas amphichloe
Single program	NA						Heliconius charithonia
Perfect match (3)	NA							Heliopetes ericetorum		Heliopetes ericetorum	Heliopetes ericetorum
Perfect match (2)	NA						Hemiargus ceraunus				Hemiargus ceraunus
Perfect match (4)	NA	Hermeuptychia sosybius			Hermeuptychia sosybius	Hermeuptychia sosybius	Hermeuptychia sosybius
Single program	NA						Hesperia attalus
Neutral subspecies	NA							Hesperia colorado	Hesperia colorado idaho	Hesperia colorado	Hesperia colorado
Perfect match (3)	NA			Hesperia comma				Hesperia comma	Hesperia comma
Single program	NA		Hesperia dacotae
Perfect match (4)	NA							Hesperia juba	Hesperia juba	Hesperia juba	Hesperia juba
Perfect match (6)	NA	Hesperia leonardus	Hesperia leonardus	Hesperia leonardus	Hesperia leonardus	Hesperia leonardus				Hesperia leonardus
Single program	NA						Hesperia meskei
Perfect match (4)	NA	Hesperia metea		Hesperia metea	Hesperia metea	Hesperia metea
Perfect match (3)	NA							Hesperia nevada	Hesperia nevada	Hesperia nevada
Perfect match (4)	NA	Hesperia ottoe	Hesperia ottoe	Hesperia ottoe						Hesperia ottoe
Single program	NA									Hesperia pahaska
Perfect match (4)	NA	Hesperia sassacus		Hesperia sassacus	Hesperia sassacus	Hesperia sassacus
Single program	NA									Hesperia uncas
Single program	NA									Hesperia viridis
Single program	NA									Hesperopsis alpheus
Single program	NA									Hesperopsis libya
Perfect match (8)	NA	Hylephila phyleus	Hylephila phyleus	Hylephila phyleus	Hylephila phyleus	Hylephila phyleus	Hylephila phyleus			Hylephila phyleus	Hylephila phyleus
Single program	NA									Hypaurotis crysalus
Single program	NA						Hypolimnas misippus
Perfect match	NA	Junonia coenia	Junonia coenia	Junonia coenia	Junonia coenia	Junonia coenia	Junonia coenia			Junonia coenia	Junonia coenia
Single program	NA						Junonia evarete
Single program	NA						Junonia genoveva
Perfect match (2)	NA						Kricogonia lyside			Kricogonia lyside
Single program	NA						Leptotes cassius
Perfect match (6)	NA	Leptotes marina	Leptotes marina		Leptotes marina	Leptotes marina				Leptotes marina	Leptotes marina
Perfect match (4)	NA	Lerema accius			Lerema accius	Lerema accius	Lerema accius
Perfect match (7)	NA	Lerodea eufala	Lerodea eufala		Lerodea eufala	Lerodea eufala	Lerodea eufala			Lerodea eufala	Lerodea eufala
Perfect match (7)	NA	Libytheana carinenta	Libytheana carinenta	Libytheana carinenta	Libytheana carinenta	Libytheana carinenta	Libytheana carinenta			Libytheana carinenta
Perfect match (8)	NA	Limenitis archippus	Limenitis archippus	Limenitis archippus	Limenitis archippus	Limenitis archippus	Limenitis archippus	Limenitis archippus		Limenitis archippus
Overlapping subspecies	NA		Limenitis arthemis arthemis	Limenitis arthemis arthemis	Limenitis arthemis arthemis
Overlapping subspecies	NA	Limenitis arthemis astyanax	Limenitis arthemis astyanax	Limenitis arthemis astyanax	Limenitis arthemis astyanax	Limenitis arthemis astyanax	Limenitis arthemis astyanax			Limenitis arthemis astyanax
Single program	NA									Limenitis weidemeyerii
Perfect match (3)	NA							Limenitis lorquini	Limenitis lorquini		Limenitis lorquini
Perfect match (2)	NA									Lycaena arota	Lycaena arota
Perfect match	NA							Lycaena cupreus		Lycaena cupreus
Perfect match (4)	NA	Lycaena dione	Lycaena dione	Lycaena dione						Lycaena dione
Perfect match (2)	NA			Lycaena dorcas	Lycaena dorcas
Perfect match (3)	NA							Lycaena editha	Lycaena editha	Lycaena editha
Perfect match (2)	NA			Lycaena epixanthe	Lycaena epixanthe
Single program	NA										Lycaena gorgon
Perfect match (8)	NA	Lycaena helloides	Lycaena helloides	Lycaena helloides	Lycaena helloides			Lycaena helloides	Lycaena helloides	Lycaena helloides	Lycaena helloides
Perfect match (3)	NA							Lycaena heteronea	Lycaena heteronea	Lycaena heteronea
Perfect match (6)	NA	Lycaena hyllus	Lycaena hyllus	Lycaena hyllus	Lycaena hyllus	Lycaena hyllus				Lycaena hyllus
Perfect match (2)	NA							Lycaena mariposa	Lycaena mariposa
Perfect match (2)	NA							Lycaena nivalis		Lycaena nivalis
Perfect match (5)	NA	Lycaena phlaeas	Lycaena phlaeas	Lycaena phlaeas	Lycaena phlaeas	Lycaena phlaeas
Perfect match (2)	NA							Lycaena rubidus		Lycaena rubidus
Single program	NA										Lycaena xanthoides
Single program	NA						Lycorea halia
Single program	NA						Marpesia chiron
Single program	NA						Marpesia eleuchea
Single program	NA						Marpesia petreus
Single program	NA						Megathymus cofaqui
Single program	NA									Megathymus streckeri
Perfect match (3)	NA					Megathymus yuccae	Megathymus yuccae			Megathymus yuccae
Overlapping subspecies	cymela-viola	Megisto cymela	Megisto cymela	Megisto cymela	Megisto cymela	Megisto cymela	Megisto cymela cymela			Megisto cymela
Overlapping subspecies	cymela-viola						Megisto cymela viola			Megisto cymela
Single program	NA						Ministrymon azia
Perfect match (5)	NA	Nastra lherminier	Nastra lherminier		Nastra lherminier	Nastra lherminier	Nastra lherminier
Single program	NA						Nastra neamathla
Perfect match (9)	NA	Nathalis iole	Nathalis iole	Nathalis iole	Nathalis iole	Nathalis iole	Nathalis iole	Nathalis iole		Nathalis iole	Nathalis iole
Single program	NA									Neominois ridingsii
Single program	NA									Neominois wyomingo
Single program	NA						Neonympha areolatus
Perfect match (2)	NA			Neonympha mitchellii	Neonympha mitchellii
Perfect match (3)	NA							Neophasia menapia	Neophasia menapia	Neophasia menapia
Single program	NA						Nyctelius nyctelius
Perfect match (9)	NA	Nymphalis antiopa	Nymphalis antiopa	Nymphalis antiopa	Nymphalis antiopa	Nymphalis antiopa	Nymphalis antiopa	Nymphalis antiopa	Nymphalis antiopa	Nymphalis antiopa	Nymphalis antiopa
Perfect match (5)	NA				Nymphalis californica			Nymphalis californica	Nymphalis californica	Nymphalis californica	Nymphalis californica
Synonym (Spelling)	vaualbum; vau-album; l-album	Nymphalis vaualbum	Nymphalis vaualbum	Nymphalis vaualbum	Nymphalis vau-album		Nymphalis vaualbum	Nymphalis l-album
Single program	NA									Oarisma edwardsii
Perfect match (3)	NA							Oarisma garita	Oarisma garita	Oarisma garita
Single program	NA		Oarisma poweshiek
Single program	NA										Ochlodes agricola
Perfect match (4)	NA							Ocholdes sylvanoides	Ocholdes sylvanoides	Ocholdes sylvanoides	Ocholdes sylvanoides
Perfect match (2)	NA							Ochlodes yuma		Ochlodes yuma
Single program	NA									Oeneis alberta
Single program	NA									Oeneis bore
Perfect match (4)	NA			Oeneis chryxus				Oeneis chryxus	Oeneis chryxus	Oeneis chryxus
Perfect match (2)	NA			Oeneis jutta						Oeneis jutta
Perfect match (2)	NA							Oeneis melissa		Oeneis melissa
Single program	NA							Oeneis nevadensis
Single program	NA									Oeneis polixenes
Single program	NA									Oeneis uhleri
Single program	NA						Oligoria maculata
Perfect match (4)	NA	Panoquina ocola			Panoquina ocola	Panoquina ocola	Panoquina ocola
Single program	NA						Panoquina panoquin
Perfect match (2)	NA						Panoquina panoquinoides				Panoquina panoquinoides
Single program	NA						Papilio andraemon
Single program	NA						Papilio androgeus
Single program	NA						Papilio aristodemus
Perfect match (2)	NA			Papilio canadensis				Papilio canadensis
Perfect match (8)	NA	Papilio cresphontes	Papilio cresphontes	Papilio cresphontes	Papilio cresphontes	Papilio cresphontes	Papilio cresphontes			Papilio cresphontes	Papilio cresphontes
Perfect match (4)	NA							Papilio eurymedon	Papilio eurymedon	Papilio eurymedon	Papilio eurymedon
Perfect match (7)	NA	Papilio glaucus	Papilio glaucus	Papilio glaucus	Papilio glaucus	Papilio glaucus	Papilio glaucus			Papilio glaucus
Perfect match (2)	NA							Papilio indra		Papilio indra
Perfect match (7)	NA	Papilio polyxenes	Papilio polyxenes	Papilio polyxenes	Papilio polyxenes	Papilio polyxenes	Papilio polyxenes			Papilio polyxenes
Perfect match (3)	NA							Papilio machaon	Papilio machaon	Papilio machaon
Perfect match (4)	NA							Papilio zelicaon	Papilio zelicaon	Papilio zelicaon	Papilio zelicaon
Synonym (Spelling)	multicaudat(a/us)							Papilio multicaudata	Papilio multicaudatus	Papilio multicaudata
Perfect match (2)	NA					Papilio palamedes	Papilio palamedes
Perfect match (4)	NA							Papilio rutulus	Papilio rutulus	Papilio rutulus	Papilio rutulus
Perfect match (6)	NA	Papilio troilus	Papilio troilus	Papilio troilus	Papilio troilus	Papilio troilus	Papilio troilus
Single program	NA									Paratrytone snowi
Single program	NA							Parnassius clodius
Perfect match (3)	NA							Parnassius smintheus	Parnassius smintheus	Parnassius smintheus
Perfect match (6)	NA	Parrhasius m-album	Parrhasius m-album	Parrhasius m-album	Parrhasius m-album	Parrhasius m-album	Parrhasius m-album
Single program	NA										Philotes sonorensis
Single program	NA						Phocides pigmalion
Perfect match (2)	NA						Phoebis agarithe			Phoebis agarithe
Perfect match (2)	NA				Phoebis philea		Phoebis philea
Perfect match (8)	NA	Phoebis sennae	Phoebis sennae	Phoebis sennae	Phoebis sennae	Phoebis sennae	Phoebis sennae			Phoebis sennae	Phoebis sennae
Perfect match (9)	NA	Pholisora catullus	Pholisora catullus	Pholisora catullus	Pholisora catullus	Pholisora catullus	Pholisora catullus	Pholisora catullus	Pholisora catullus	Pholisora
Perfect match (3)	NA			Phyciodes batesii	Phyciodes batesii					Phyciodes batesii
Multiple issues	cocyta-selenis			Phyciodes selenis/cocyta	Phyciodes selenis			Phyciodes cocyta (syn for NABA selenis)	Phyciodes cocyta selenis	Phyciodes cocyta
Perfect match (3)	NA							Phyciodes mylitta	Phyciodes mylitta		Phyciodes mylitta
Perfect match (3)	NA							Phyciodes pallida	Phyciodes pallida	Phyciodes pallida
Perfect match (3)	NA					Phyciodes phaon	Phyciodes phaon			Phyciodes phaon
Single program	NA									Phyciodes picta
Perfect match (3)	NA							Phyciodes pulchella	Phyciodes pulchella	Phyciodes pulchella
Perfect match (7)	NA	Phyciodes tharos	Phyciodes tharos	Phyciodes tharos	Phyciodes tharos	Phyciodes tharos	Phyciodes tharos			Phyciodes tharos
Perfect match (3)	NA							Pieris marginalis	Pieris marginalis	Pieris marginalis
Perfect match (2)	NA			Pieris napi	Pieris napi
Perfect match (10)	NA	Pieris rapae	Pieris rapae	Pieris rapae	Pieris rapae	Pieris rapae	Pieris rapae	Pieris rapae	Pieris rapae	Pieris rapae	Pieris rapae
Perfect match (3)	NA			Pieris virginiensis	Pieris virginiensis	Pieris virginiensis
Single program	NA									Piruna pirus
Perfect match (2)	NA							Plebejus acmon			Plebejus acmon
Single program	NA							Plebejus anna
Single program	NA									Plebejus cotundra
Perfect match (4)	NA							Plebejus icarioides	Plebejus icarioides	Plebejus icarioides	Plebejus icarioides
Perfect match (3)	NA							Plebejus idas	Plebejus idas	Plebejus idas
Multiple issues	Plebejus-Lycaeides; melissa-samuelis	Plebejus melissa	Lycaeides melissa	Lycaeides melissa samuelis	Lycaeides melissa samuelis			Plebejus melissa	Plebejus melissa	Plebejus melissa
Overlapping subspecies	lupini and texas							Plebejus lupini	Plebejus lupini	Plebejus lupini lupini
Overlapping subspecies	lupini and texas									Plebejus lupini texanus
Perfect match (4)	NA			Plebejus saepiolus				Plebejus saepiolus	Plebejus saepiolus	Plebejus saepiolus
Single program	NA									Plebejus shasta
Single program	NA						Poanes aaroni
Perfect match (5)	NA	Poanes hobomok	Poanes hobomok	Poanes hobomok	Poanes hobomok	Poanes hobomok
Perfect match (4)	NA	Poanes massasoit	Poanes massasoit	Poanes massasoit	Poanes massasoit
Single program	NA										Poanes melane
Single program	NA									Poanes taxiles
Perfect match (6)	NA	Poanes viator	Poanes viator	Poanes viator	Poanes viator	Poanes viator	Poanes viator
Perfect match (3)	NA	Poanes yehl				Poanes yehl	Poanes yehl
Perfect match (6)	NA	Poanes zabulon	Poanes zabulon	Poanes zabulon	Poanes zabulon	Poanes zabulon	Poanes zabulon
Single program	NA									Poladryas arachne
Single program	NA						Polites baracoa
Single program	NA							Polites mardon
Perfect match (7)	NA	Polites mystic	Polites mystic	Polites mystic	Polites mystic			Polites mystic	Polites mystic	Polites mystic
Perfect match (7)	NA	Polites origenes	Polites origenes	Polites origenes	Polites origenes	Polites origenes	Polites origenes			Polites origenes
Perfect match (7)	NA	Polites peckius	Polites peckius	Polites peckius	Polites peckius	Polites peckius		Polites peckius		Polites peckius
Single program	NA									Polites rhesus
Perfect match (3)	NA							Polites sabuleti		Polites sabuleti	Polites sabuleti
Perfect match (2)	NA							Polites sonora		Polites sonora
Perfect match (8)	NA	Polites themistocles	Polites themistocles	Polites themistocles	Polites themistocles	Polites themistocles	Polites themistocles	Polites themistocles		Polites themistocles
Perfect match (3)	NA				Polites vibex	Polites vibex	Polites vibex
Perfect match (6)	NA	Polygonia comma	Polygonia comma	Polygonia comma	Polygonia comma	Polygonia comma	Polygonia comma
Perfect match (5)	NA				Polygonia faunus	Polygonia faunus		Polygonia faunus	Polygonia faunus	Polygonia faunus
Complex	gracilis-zephyrys									Polygonia gracilis		Only zephrys occurs in Cascades, Colorado, MPG. gracilis occurs only in far north (Canada) (Scott 1986 and others).
Complex	gracilis-zephyrys							Polygonia gracilis	Polygonia gracilis zephyrus	Polygonia zephyrus		Cascades (Pelham) P. gracilis includes P. gracilis zephrys
Perfect match (7)	NA	Polygonia interrogationis	Polygonia interrogationis	Polygonia interrogationis	Polygonia interrogationis	Polygonia interrogationis	Polygonia interrogationis			Polygonia interrogationis
Perfect match (2)	NA							Polygonia oreas	Polygonia oreas
Perfect match (6)	NA	Polygonia progne	Polygonia progne	Polygonia progne	Polygonia progne	Polygonia progne				Polygonia progne
Perfect match (5)	NA				Polygonia satyrus			Polygonia satyrus	Polygonia satyrus	Polygonia satyrus	Polygonia satyrus
Perfect match (2)	NA						Polygonus leo				Polygonus leo
Perfect match (6)	NA	Pompeius verna	Pompeius verna	Pompeius verna	Pompeius verna	Pompeius verna	Pompeius verna
Perfect match (3)	NA							Pontia beckerii	Pontia beckerii	Pontia beckerii
Perfect match (3)	NA							Pontia occidentalis	Pontia occidentalis	Pontia occidentalis
Perfect match (10)	NA	Pontia protodice	Pontia protodice	Pontia protodice	Pontia protodice	Pontia protodice	Pontia protodice	Pontia protodice	Pontia protodice	Pontia protodice	Pontia protodice
Perfect match (3)	NA							Pontia sisymbrii	Pontia sisymbrii	Pontia sisymbrii
Perfect match (4)	NA	Problema byssus	Problema byssus		Problema byssus		Problema byssus
Perfect match (4)	NA			Pyrgus centaureae	Pyrgus centaureae			Pyrgus centaureae		Pyrgus centaureae
Conglomerate	communis/albescens					Pyrgus communis/albescens	Pyrgus albescens				Pyrgus albescens
Conglomerate	communis/albescens	Pyrgus communis	Pyrgus communis	Pyrgus communis	Pyrgus communis		Pyrgus communis	Pyrgus communis	Pyrgus communis	Pyrgus communis
Single program	NA						Pyrgus oileus
Perfect match (2)	NA							Pyrgus ruralis		Pyrgus ruralis
Single program	NA									Pyrgus scriptura
Single program	NA									Pyrgus xanthus
Single program	NA						Pyrisitia dina
Single program	NA						Pyrisitia messalina
Single program	NA						Pyrisitia nise
Synonym (Spelling)	acadica-acadicum	Satyrium acadicum	Satyrium acadicum	Satyrium acadica	Satyrium acadicum					Satyrium acadica
Single program	NA										Satyrium auretorum
Perfect match (2)	NA							Satyrium behrii		Satyrium behrii
Perfect match (7)	NA	Satyrium calanus	Satyrium calanus	Satyrium calanus	Satyrium calanus	Satyrium calanus	Satyrium calanus			Satyrium calanus
Perfect match (4)	NA							Satyrium californica	Satyrium californica	Satyrium californica	Satyrium californica
Synonym (Spelling)	caryaevorum/us	Satyrium caryaevorum	Satyrium caryaevorum	Satyrium caryaevorum	Satyrium caryaevorum	Satyrium caryaevorus
Perfect match (5)	NA	Satyrium edwardsii	Satyrium edwardsii	Satyrium edwardsii	Satyrium edwardsii	Satyrium edwardsii
Multiple issues	Fixsenia/favonius/ontario	Satyrium favonius			Fixsenia favonius	Satyrium favonius	Satyrium favonius
Multiple issues	Fixsenia/favonius/ontario			Satyrium favonius ontario		Satyrium favonius ontario
Complex	fulginosum-semiluna							Satyrium fulginosum semiluna		Satyrium
Single program	NA						Satyrium kingi
Perfect match (7)	NA	Satyrium liparops	Satyrium liparops	Satyrium liparops	Satyrium liparops	Satyrium liparops	Satyrium liparops			Satyrium liparops
Perfect match (4)	NA							Satyrium saepium	Satyrium saepium	Satyrium saepium	Satyrium saepium
Perfect match (4)	NA							Satyrium sylvinus	Satyrium sylvinus	Satyrium sylvinus	Satyrium sylvinus
Single program	NA										Satyrium tetra
Perfect match (9)	NA	Satyrium titus	Satyrium titus	Satyrium titus	Satyrium titus	Satyrium titus	Satyrium titus	Satyrium titus	Satyrium titus	Satyrium titus
Perfect match (5)	NA	Satyrodes appalachia		Satyrodes appalachia	Satyrodes appalachia	Satyrodes appalachia	Satyrodes appalachia
Perfect match (5)	NA	Satyrodes eurydice	Satyrodes eurydice	Satyrodes eurydice	Satyrodes eurydice					Satyrodes eurydice
Single program	NA						Siproeta stelenes
Perfect match (6)	NA	Speyeria aphrodite	Speyeria aphrodite	Speyeria aphrodite	Speyeria aphrodite	Speyeria aphrodite				Speyeria aphrodite
Perfect match (5)	NA			Speyeria atlantis	Speyeria atlantis			Speyeria atlantis	Speyeria atlantis	Speyeria atlantis
Perfect match (3)	NA							Speyeria hesperis	Speyeria hesperis	Speyeria hesperis
Neutral subspecies	comstocki							Speyeria callippe	Speyeria callippe	Speyeria callippe	Speyeria callippe comstocki
Perfect match	NA							Speyeria	Speyeria coronis	Speyeria
Neutral subspecies	leto	Speyeria cybele	Speyeria cybele	Speyeria	Speyeria cybele	Speyeria	Speyeria	Speyeria	Speyeria cybele leto	Speyeria
Perfect match (2)	NA				Speyeria diana	Speyeria diana
Perfect match (2)	NA								Speyeria edwardsii	Speyeria edwardsii
Perfect match (3)	NA							Speyeria egleis	Speyeria egleis	Speyeria egleis
Perfect match (3)	NA							Speyeria hydaspe	Speyeria hydaspe	Speyeria hydaspe
Perfect match (5)	NA	Speyeria idalia	Speyeria idalia	Speyeria idalia	Speyeria idalia					Speyeria idalia
Perfect match (3)	NA							Speyeria mormonia	Speyeria mormonia	Speyeria mormonia
Single program	NA									Speyeria nokomis
Perfect match (3)	NA							Speyeria zerene	Speyeria zerene	Speyeria zerene
Perfect match (5)	NA	Staphylus hayhurstii	Staphylus hayhurstii		Staphylus hayhurstii	Staphylus hayhurstii	Staphylus hayhurstii
Single program	NA									Stinga morrisoni
Single program	NA						Strymon acis
Single program	NA						Strymon istapa
Single program	NA						Strymon limenia
Single program	NA						Strymon martialis
Perfect match (10)	NA	Strymon melinus	Strymon melinus	Strymon melinus	Strymon melinus	Strymon melinus	Strymon melinus	Strymon melinus	Strymon melinus	Strymon melinus	Strymon melinus
Perfect match (6)	NA	Thorybes bathyllus	Thorybes bathyllus	Thorybes bathyllus	Thorybes bathyllus	Thorybes bathyllus	Thorybes bathyllus
Perfect match (4)	NA	Thorybes confusis			Thorybes confusis	Thorybes confusis	Thorybes confusis
Single program	NA									Thorybes mexicana
Perfect match (8)	NA	Thorybes pylades	Thorybes pylades	Thorybes pylades	Thorybes pylades	Thorybes pylades	Thorybes pylades	Thorybes pylades		Thorybes pylades
Perfect match (8)	NA	Thymelicus lineola	Thymelicus lineola	Thymelicus lineola	Thymelicus lineola	Thymelicus lineola		Thymelicus lineola	Thymelicus lineola	Thymelicus lineola
Perfect match (2)	NA					Urbanus dorantes	Urbanus dorantes
Perfect match (4)	NA	Urbanus proteus			Urbanus proteus	Urbanus proteus	Urbanus proteus
Perfect match (4)	NA							Vanessa annabella	Vanessa annabella	Vanessa annabella	Vanessa annabella
Perfect match (10)	NA	Vanessa atalanta	Vanessa atalanta	Vanessa atalanta	Vanessa atalanta	Vanessa atalanta	Vanessa atalanta	Vanessa atalanta	Vanessa atalanta	Vanessa	Vanessa atalanta
Perfect match (10)	NA	Vanessa cardui	Vanessa cardui	Vanessa cardui	Vanessa cardui	Vanessa cardui	Vanessa cardui	Vanessa cardui	Vanessa cardui	Vanessa cardui	Vanessa cardui
Perfect match (9)	NA	Vanessa virginiensis	Vanessa virginiensis	Vanessa virginiensis	Vanessa virginiensis	Vanessa virginiensis	Vanessa virginiensis	Vanessa virginiensis		Vanessa virginiensis	Vanessa virginiensis
Perfect match (6)	NA	Wallengrenia egeremet	Wallengrenia egeremet	Wallengrenia egeremet	Wallengrenia egeremet	Wallengrenia egeremet	Wallengrenia egeremet
Perfect match (3)	NA				Wallengrenia otho	Wallengrenia otho	Wallengrenia otho
Single program	NA									Zestusa dorus
Single program	NA										Zerene eurydice
Single program	NA				Papilio joanae
