# Supplementary material for: A novel curation system to facilitate data integration across regional citizen science survey programs
Source: PeerJ. 2020 Jul 29;8:e9219. doi: 10.7717/peerj.9219 (PMC7395600; doi:10.7717/peerj.9219)
Supplement: Supplemental Information 5 — Note: issues here are those that pertain only to our 10 program lists. Base authority lists have other conflicts that do not appear in the subset of taxa included here. aPrograms refining taxon identity to subspecies allow user to combine data at either species or subspecies level (given that compatible subspecies level is parsed at both). When a program parses data into two subspecies, both must be included in species-level comparisons. User should ensure level of analysis is clear. bIndicates a name that aligns with different species concepts at different programs. cConglomerate not a species level concept. [file peerj-08-9219-s005.xlsx]

## Sheet: S3- detail, project discr types
Discrepancy types and taxonomic names used	Number of names used by our programs	Number of conflicting species concepts	Notes
Category 1. Simple issues (names align 1:1 with taxon concept)
a. Genus deviations: different genus names used
[Eurybia - Abais] nicippe	2	1	combinable
[Agriades - Plebejus] glandon	2	1	combinable
[Everes - Cupido] comyntas	2	1	combinable
[Eurema - Pyristia] lisa	2	1	combinable
[Hemiargus - Echinargus] isola	2	1	combinable
[Nymphalis - Aglais] milberti	2	1	combinable; programs also use species spelling variant, see milbertii below
[Plebejus - Lycaeides] melissa	2	1	combinable; programs also use subspecies name variant, see samuelis below
[Fixsenia - Satyrium] favonius	2	1	combinable; programs also use subspecies name variant, see ontario below
b. Species deviations: alternate synonym or spelling used
Copaeodes [minimus - minima]	2	1	combinable
Euphyes [conspicua - conspicuus]	2	1	combinable
Nymphalis [vaualbum - vau-album - l-album]	3	1	combinable
Papilio [multicaudata - multicaudatus]	2	1	combinable
Satyrium [acadia - acadium]	2	1	combinable
Satyrium [caryaevorum - caryaevorus]	2	1	combinable
Nymphalis [milberti - milbertii]	2	1	combinable; programs also use genus name variant, see, see Aglais above
Phyciodes [selenis; cocyta; selenis/cocyta; cocyta selenis]	4	1	We consider these four names as (combinable) synonyms, however users should be aware some may recognize taxon concept distinctions among these terms
Category 2. Subspecies Issuesa
a. some programs specify taxon to subspecies level (for all programs in this study names align 1:1 at species level, since the subspecies fully represents the species at that location)
Cercyonis sthenele (silvestris)	2	1
Coenonympha tullia (california)	2	1
Euphyes vestris (harbisoni)	2	1
Speyeria callippe (comstocki)	2	1
Speyeria cybele (leto)	2	1
Hesperia colorado (idaho)	2	1
Erynnis brizo (brizo)	2	1
Satyrium favonius (ontario)	2	1	programs also use genus name variant, see Fixsenia above
b. Some programs list more than one subspecies (names align 1:1 at species-level as long as all subspecies are included in any comparisons)
Megisto cymela (cymela; viola)	3	1	species-level analysis requires inclusion of both subspecies
Plebejus lupini (lupini; texanus)	3	1	species-level analysis requires inclusion of both subspecies
Category 3. Taxonomic issues: difficult identifications, taxonomic revisions including subspecies promotion (names may not align 1:1 with taxonomic identity)
a. Conglomerates (species level ID difficult to distinguish in field so some programs collect combined data)
Colias eurytheme; C. philodice; C. eurytheme/philodice	3	NA	When program combinations include C. eurytheme/philodice, data may be analyzed only at levels higher than species concept.
Pyrgus communis; P. albescens; P. communis/albescens	3	NA	When program combinations include P. communis/albescens, data may be analyzed only at levels higher than species concept.
b. Complexes (different species concept interpretations).
Callophrys dumetorum; C. perplexa	2	1	Subspecies promotion. For the programs (Cas, Irvine) included in this study, these names reference the same population (taxon concept =perplexa) but at different taxonomic levels.
Satyrium fulginosum semiluna; S. semiluna	2	1	Subspecies promotion. For the programs (Cas, CO) included in this study, these names reference the same population (taxon concept =semiluna) but at different taxonomic levels.
Polygonia gracilis zephrys; P. gracilis; P. zephrys	3	1	Subspecies promotion. For the programs (Cas, MPG, CO) included in this study, these names reference the same single population (taxon concept =zephrys) but at different taxonomic levels.
Euphilotes "battoides"; E. "battoides" on heracleoides; E. battoides	3	3	Poorly understood taxonomy: Three programs involved, three battoides concepts.
Adelpha bredowiib; A. californicab; A. eulaliab	3	3	Taxonomic revision: three intersecting species concepts (bredowii= californica+eulalia; eulalia; californica). User must evaluate taxonomy and geography to determine compatibility among programs.
Colias alexandrab	1	2	Subspecies promotion: Programs sample either alexandra or harfordii populations, using different, conflicting alexandra species concept interpretations: alexandra containing subspecies harfordii (Irvine); alexandra and harfordii distinct species (Cas, MPG, CO).
Lycaeides melissab	1	2	Subspecies promotion: Programs sample either melissa or samuelis populations, using different, conflicting melissa species concept interpretations: melissa including subspecies samuelis (O&W- and NABA-based programs) or melissa and samuelis distinct species (Pelham-based). Note also genus name variant, see Plebejus above.
Euphydryas colonb	1	2	Subspecies promotion: Cas, MPG, Irvine programs sample either colon or chalcedona populations, using different, conflicting interpretations of the colon species concept: colon including chalcedona as conspecific (O&W-based programs); or colon and chalcedona as distinct species (Pelham-based).
Speyeria atlantisb	1	2	Subspecies promotion: programs sample either atlantis or hesperis populations, using different, conflicting interpretations of the atlantis species concept: atlantis including subspecies hesperis (NABA-based programs) or atlantis a distinct species from hesperis (Pelham-, O&W-based).
Callophrys gryneusb	1	2	Subspecies promotion: Programs sample either gryneus or nelsoni populations, using different, conflicting interpretations of the gryneus species concept: gryneus including nelsoni as a subspecies (NABA-, Pelham-based programs), or gryneus a distinct species from nelsoni (O&W-based).
Anthocharis sarab	1	2	Subspecies promotion: Cas, MPG (O&W-based), CO and Irvine (Pelham-based) use differently interpreted sara species concepts: sara (sensu O&W - doesn't include julia or thoosa), sara (sensu Pelham - includes julia, thoosa as subspecies). Complicated by geography - sara, julia, thoosa populations can overlap distributions at different programs.
c. Species complex with conglomerated taxa
Celastrina ladonb; C. ladon/neglecta	2	3c	The ladon complex has complicated distribution across the programs included here. Programs interpret names with conflicting interpretations of neglecta, lucia, humulus, echo as either subspecies of ladon or distinct species, ladon is interpreted under three different taxon concepts: ladon (sensu NABA); ladon (sensu Pelham/O&W); ladon (sensu Ohio); and a conglomerate: ladon/neglecta.
