# Supplementary material for: A novel curation system to facilitate data integration across regional citizen science survey programs
Source: PeerJ. 2020 Jul 29;8:e9219. doi: 10.7717/peerj.9219 (PMC7395600; doi:10.7717/peerj.9219)
Supplement: Supplemental Information 6 — Taxon name used at each program is given in parentheses next to receiver program. Key to abbreviations as follows: PM Perfect match (identical names/identical concepts); Z= no match (Zero). The taxonomic unit does not occur at the donor program; ABS= species absent from receiver program - no request would be made; EM= returns corrected match (equivalent match); EM-s= returns corrected match (equivalent match) but difference is just at the sub-species level; EM,Z= returns an equivalent match for only one of the species involved in input conglomerate, user must assess; MM= returns multiple matches, user should assess compatibility; Com= returns a taxon that is compatible if receiver program includes another taxon; Com*= return is conglomerate of multiple species that is not comparable because receiver collects data only for one of the species, user must assess. Other less common codes are explained under comments and notes adjacent to each taxon matrix. Green cells indicate compatible matches. Orange cells indicate compatibility issues and require flag returned with output. [file peerj-08-9219-s006.xlsx]

## Sheet: S4 - matrices
												Comments and Notes
Eurema-Abais nicippe	Donor												Genus deviation
Receiver	IL	IA	MI	OH	TN	FL	Cas	MPG	CO	Irvine
IL (Eurema nicippe)	X	PM	Z	PM	EM	EM	Z	Z	EM	EM
IA (Eurema nicippe)	PM	X	Z	PM	EM	EM	Z	Z	EM	EM
MI	ABS	ABS	ABS	ABS	ABS	ABS	ABS	ABS	ABS	ABS
OH (Eurema nicippe)	PM	PM	Z	X	EM	EM	Z	Z	EM	EM
TN (Abais nicippe)	EM	EM	Z	EM	X	PM	Z	Z	PM	PM
FL (Abais nicippe)	EM	EM	Z	EM	PM	X	Z	Z	PM	PM
Cas	ABS	ABS	ABS	ABS	ABS	ABS	ABS	ABS	ABS	ABS
MPG	ABS	ABS	ABS	ABS	ABS	ABS	ABS	ABS	ABS	ABS
CO (Abais nicippe)	EM	EM	Z	EM	PM	PM	Z	Z	X	PM
Irvine (Abais nicippe)	EM	EM	Z	EM	PM	PM	Z	Z	PM	X
Agriades-Plebejus glandon	Donor												Genus deviation
Receiver	IL	IA	MI	OH	TN	FL	Cas	MPG	CO	Irvine
IL	ABS	ABS	ABS	ABS	ABS	ABS	ABS	ABS	ABS	ABS
IA	ABS	ABS	ABS	ABS	ABS	ABS	ABS	ABS	ABS	ABS
MI	ABS	ABS	ABS	ABS	ABS	ABS	ABS	ABS	ABS	ABS
OH	ABS	ABS	ABS	ABS	ABS	ABS	ABS	ABS	ABS	ABS
TN	ABS	ABS	ABS	ABS	ABS	ABS	ABS	ABS	ABS	ABS
FL	ABS	ABS	ABS	ABS	ABS	ABS	ABS	ABS	ABS	ABS
Cas (Agriades glandon)	Z	Z	Z	Z	Z	Z	X	Z	EM	Z
MPG	ABS	ABS	ABS	ABS	ABS	ABS	ABS	ABS	ABS	ABS
CO (Plebejus glandon)	Z	Z	Z	Z	Z	Z	EM	Z	X	Z
Irvine	ABS	ABS	ABS	ABS	ABS	ABS	ABS	ABS	ABS	ABS
Everes-Cupido comyntas	Donor												Genus deviation
Receiver	IL	IA	MI	OH	TN	FL	Cas	MPG	CO	Irvine
IL (Everes comyntas)	X	PM	PM	PM	EM	EM	EM	Z	EM	Z
IA (Everes comyntas)	PM	X	PM	PM	EM	EM	EM	Z	EM	Z
MI (Everes comyntas)	PM	PM	X	PM	EM	EM	EM	Z	EM	Z
OH (Everes comyntas)	PM	PM	PM	X	EM	EM	EM	Z	EM	Z
TN (Cupido comyntas)	EM	EM	EM	EM	X	PM	PM	Z	PM	Z
FL (Cupido comyntas)	EM	EM	EM	EM	PM	X	PM	Z	PM	Z
Cas (Cupido comyntas)	EM	EM	EM	EM	PM	PM	X	Z	PM	Z
MPG	ABS	ABS	ABS	ABS	ABS	ABS	ABS	ABS	ABS	ABS
CO (Cupido comyntas)	EM	EM	EM	EM	PM	PM	PM	Z	X	Z
Irvine	ABS	ABS	ABS	ABS	ABS	ABS	ABS	ABS	ABS	ABS
Eurema-Pyristia lisa	Donor												Genus deviation
Receiver	IL	IA	MI	OH	TN	FL	Cas	MPG	CO	Irvine
IL (Eurema lisa)	X	PM	PM	PM	EM	EM	Z	Z	EM	Z
IA (Eurema lisa)	PM	X	PM	PM	EM	EM	Z	Z	EM	Z
MI (Eurema lisa)	PM	PM	X	PM	EM	EM	Z	Z	EM	Z
OH (Eurema lisa)	PM	PM	PM	X	EM	EM	Z	Z	EM	Z
TN (Pyristia lisa)	EM	EM	EM	EM	X	PM	Z	Z	PM	Z
FL (Pyristia lisa)	EM	EM	EM	EM	PM	X	Z	Z	PM	Z
Cas	ABS	ABS	ABS	ABS	ABS	ABS	ABS	ABS	ABS	ABS
MPG	ABS	ABS	ABS	ABS	ABS	ABS	ABS	ABS	ABS	ABS
CO (Pyristia lisa)	EM	EM	EM	EM	PM	PM	Z	Z	X	Z
Irvine	ABS	ABS	ABS	ABS	ABS	ABS	ABS	ABS	ABS	ABS
Hemiargus-Echinargus isola	Donor												Genus deviation
Receiver	IL	IA	MI	OH	TN	FL	Cas	MPG	CO	Irvine
IL (Hemiargus isola)	X	EM	PM	PM	EM	Z	Z	Z	EM	Z
IA (Echinargus isola)	EM	X	EM	EM	PM	Z	Z	Z	PM	Z
MI (Hemiargus isola)	PM	EM	X	PM	EM	Z	Z	Z	EM	Z
OH (Hemiargus isola)	PM	EM	PM	X	EM	Z	Z	Z	EM	Z
TN (Echinargus isola)	EM	PM	EM	EM	X	Z	Z	Z	PM	Z
FL	ABS	ABS	ABS	ABS	ABS	ABS	ABS	ABS	ABS	ABS
Cas	ABS	ABS	ABS	ABS	ABS	ABS	ABS	ABS	ABS	ABS
MPG	ABS	ABS	ABS	ABS	ABS	ABS	ABS	ABS	ABS	ABS
CO (Echinargus isola)	EM	PM	EM	EM	PM	Z	Z	Z	X	Z
Irvine	ABS	ABS	ABS	ABS	ABS	ABS	ABS	ABS	ABS	ABS
Nymphalis-Aglais milberti(i)	Donor												Genus deviation, spelling deviation
Receiver	IL	IA	MI	OH	TN	FL	Cas	MPG	CO	Irvine
IL (Nymphalis milbertii)	X	EM	EM	EM	Z	Z	EM	EM	EM	Z
IA (Aglais milberti)	EM	X	EM	EM	Z	Z	PM	PM	PM	Z
MI (Nymphalis milberti)	EM	EM	X	PM	Z	Z	EM	EM	EM	Z
OH (Nymphalis milberti)	EM	EM	PM	X	Z	Z	EM	EM	EM	Z
TN	ABS	ABS	ABS	ABS	ABS	ABS	ABS	ABS	ABS	ABS
FL	ABS	ABS	ABS	ABS	ABS	ABS	ABS	ABS	ABS	ABS
Cas (Aglais milberti)	EM	PM	EM	EM	Z	Z	X	PM	PM	Z
MPG (Aglais milberti)	EM	PM	EM	EM	Z	Z	PM	X	PM	Z
CO (Aglais milberti)	EM	PM	EM	EM	Z	Z	PM	PM	X	Z
Irvine (Aglais milberti)	ABS	ABS	ABS	ABS	ABS	ABS	ABS	ABS	ABS	ABS
Satyrium/Fixsenia favonius (ontario)	Donor												Genus deviation, subspecies specification
Receiver	IL	IA	MI	OH	TN	FL	Cas	MPG	CO	Irvine			*This is tricky because TN lists S. favonius and S. favonius ontario. Michigan lists favonius ontario, others no subspecies specification
IL (Satyrium favonius)	X	Z	EM	EM	MM	PM	Z	Z	Z	Z			For any request of TN, our program returns both S. favonius and S. favonius ontario
IA	ABS	ABS	ABS	ABS	ABS	ABS	ABS	ABS	ABS	ABS			Matches are compatible at the species level. If you care about subspecies, you should proceed with caution.
MI (Satyrium favonius ontario)	EM-s	Z	X	EM-s	MM	EM-s	Z	Z	Z	Z		EM-s	Compatible at species level, but receiver has subspecies specified. If you are concerned about subspecies match, proceed with caution.
OH (Fixsenia favonius)	EM	Z	EM-s	X	MM+EM	EM	Z	Z	Z	Z
TN (Satyrium favonius)	COM	Z	COM	COM+EM	X	COM	Z	Z	Z	Z
TN (Satyrium favonius ontario)	COM	Z	COM	COM+EM	X	COM	Z	Z	Z	Z
FL (Satyrium favonius)	PM	Z	EM-s	EM	MM	X	Z	Z	Z	Z
Cas	ABS	ABS	ABS	ABS	ABS	ABS	ABS	ABS	ABS	ABS
MPG	ABS	ABS	ABS	ABS	ABS	ABS	ABS	ABS	ABS	ABS
CO	ABS	ABS	ABS	ABS	ABS	ABS	ABS	ABS	ABS	ABS
Irvine	ABS	ABS	ABS	ABS	ABS	ABS	ABS	ABS	ABS	ABS
Copaeodes minim(a-us)	Donor												Species spelling deviation
Receiver	IL	IA	MI	OH	TN	FL	Cas	MPG	CO	Irvine
IL	ABS	ABS	ABS	ABS	ABS	ABS	ABS	ABS	ABS	ABS
IA	ABS	ABS	ABS	ABS	ABS	ABS	ABS	ABS	ABS	ABS
MI	ABS	ABS	ABS	ABS	ABS	ABS	ABS	ABS	ABS	ABS
OH (C. minimus)	Z	Z	Z	X	Z	EM	Z	Z	Z	Z
TN	ABS	ABS	ABS	ABS	ABS	ABS	ABS	ABS	ABS	ABS
FL (C. minima)	Z	Z	Z	EM	Z	X	Z	Z	Z	Z
Cas	ABS	ABS	ABS	ABS	ABS	ABS	ABS	ABS	ABS	ABS
MPG	ABS	ABS	ABS	ABS	ABS	ABS	ABS	ABS	ABS	ABS
CO	ABS	ABS	ABS	ABS	ABS	ABS	ABS	ABS	ABS	ABS
Irvine	ABS	ABS	ABS	ABS	ABS	ABS	ABS	ABS	ABS	ABS
Euphyes conspicu(a-us)	Donor												Species spelling deviation
Receiver	IL	IA	MI	OH	TN	FL	Cas	MPG	CO	Irvine
IL (E. conspicua)	X	PM	PM	EM	Z	Z	Z	Z	Z	Z
IA (E. conspicua)	PM	X	PM	EM	Z	Z	Z	Z	Z	Z
MI (E. conspicua)	PM	PM	X	EM	Z	Z	Z	Z	Z	Z
OH (E. conspicuus)	EM	EM	EM	X	Z	Z	Z	Z	Z	Z
TN	ABS	ABS	ABS	ABS	ABS	ABS	ABS	ABS	ABS	ABS
FL	ABS	ABS	ABS	ABS	ABS	ABS	ABS	ABS	ABS	ABS
Cas	ABS	ABS	ABS	ABS	ABS	ABS	ABS	ABS	ABS	ABS
MPG	ABS	ABS	ABS	ABS	ABS	ABS	ABS	ABS	ABS	ABS
CO	ABS	ABS	ABS	ABS	ABS	ABS	ABS	ABS	ABS	ABS
Irvine	ABS	ABS	ABS	ABS	ABS	ABS	ABS	ABS	ABS	ABS
Nymphalis vaualbum; N. vau-album; N. l-album	Donor												Species spelling/synonym deviation
Receiver	IL	IA	MI	OH	TN	FL	Cas	MPG	CO	Irvine
IL (N. vaualbum)	X	PM	PM	EM	Z	PM	EM	Z	Z	Z
IA (N. vaualbum)	PM	X	PM	EM	Z	PM	EM	Z	Z	Z
MI (N. vaualbum)	PM	PM	X	EM	Z	PM	EM	Z	Z	Z
OH (N. vau-album)	EM	EM	EM	X	Z	EM	EM	Z	Z	Z
TN	ABS	ABS	ABS	ABS	ABS	ABS	ABS	ABS	ABS	ABS
FL (N. vaualbum)	PM	PM	PM	EM	Z	X	EM	Z	Z	Z
Cas (N. l-album)	EM	EM	EM	EM	Z	EM	X	Z	Z	Z
MPG	ABS	ABS	ABS	ABS	ABS	ABS	ABS	ABS	ABS	ABS
CO	ABS	ABS	ABS	ABS	ABS	ABS	ABS	ABS	ABS	ABS
Irvine	ABS	ABS	ABS	ABS	ABS	ABS	ABS	ABS	ABS	ABS
Papilio multicaudat(a-us)	Donor												Species spelling deviation
Receiver	IL	IA	MI	OH	TN	FL	Cas	MPG	CO	Irvine
IL	ABS	ABS	ABS	ABS	ABS	ABS	ABS	ABS	ABS	ABS
IA	ABS	ABS	ABS	ABS	ABS	ABS	ABS	ABS	ABS	ABS
MI	ABS	ABS	ABS	ABS	ABS	ABS	ABS	ABS	ABS	ABS
OH	ABS	ABS	ABS	ABS	ABS	ABS	ABS	ABS	ABS	ABS
TN	ABS	ABS	ABS	ABS	ABS	ABS	ABS	ABS	ABS	ABS
FL	ABS	ABS	ABS	ABS	ABS	ABS	ABS	ABS	ABS	ABS
Cas (P. multicaudata)	Z	Z	Z	Z	Z	Z	X	EM	PM	Z
MPG (P. multicaudatus)	Z	Z	Z	Z	Z	Z	EM	X	EM	Z
CO (P. multicaudata)	Z	Z	Z	Z	Z	Z	PM	EM	X	Z
Irvine	ABS	ABS	ABS	ABS	ABS	ABS	ABS	ABS	ABS	ABS
Satyrium acadic(a-um)	Donor												Species spelling deviation
Receiver	IL	IA	MI	OH	TN	FL	Cas	MPG	CO	Irvine
IL (S. acadica)	X	PM	PM	EM	Z	Z	Z	Z	PM	Z
IA (S. acadica)	PM	X	PM	EM	Z	Z	Z	Z	PM	Z
MI (S. acadica)	PM	PM	X	EM	Z	Z	Z	Z	PM	Z
OH (S. acadicum)	EM	EM	EM	X	Z	Z	Z	Z	EM	Z
TN	ABS	ABS	ABS	ABS	ABS	ABS	ABS	ABS	ABS	ABS
FL	ABS	ABS	ABS	ABS	ABS	ABS	ABS	ABS	ABS	ABS
Cas	ABS	ABS	ABS	ABS	ABS	ABS	ABS	ABS	ABS	ABS
MPG	ABS	ABS	ABS	ABS	ABS	ABS	ABS	ABS	ABS	ABS
CO (S. acadica)	PM	PM	PM	EM	Z	Z	Z	Z	X	Z
Irvine	ABS	ABS	ABS	ABS	ABS	ABS	ABS	ABS	ABS	ABS
Satyrium caryaevor(um-us)	Donor												Species spelling deviation
Receiver	IL	IA	MI	OH	TN	FL	Cas	MPG	CO	Irvine
IL (S. caryaevorum)	X	PM	PM	PM	EM	Z	Z	Z	Z	Z
IA (S. caryaevorum)	PM	X	PM	PM	EM	Z	Z	Z	Z	Z
MI (S. caryaevorum)	PM	PM	X	PM	EM	Z	Z	Z	Z	Z
OH (S. caryaevorum)	PM	PM	PM	X	EM	Z	Z	Z	Z	Z
TN (S. caryaevorus)	EM	EM	EM	EM	X	Z	Z	Z	Z	Z
FL	ABS	ABS	ABS	ABS	ABS	ABS	ABS	ABS	ABS	ABS
Cas	ABS	ABS	ABS	ABS	ABS	ABS	ABS	ABS	ABS	ABS
MPG	ABS	ABS	ABS	ABS	ABS	ABS	ABS	ABS	ABS	ABS
CO	ABS	ABS	ABS	ABS	ABS	ABS	ABS	ABS	ABS	ABS
Irvine	ABS	ABS	ABS	ABS	ABS	ABS	ABS	ABS	ABS	ABS
Phyciodes selenis; P. cocyta; P. selenis/cocyta; P. cocyta selenis	Donor												Species synonym deviation
Receiver	IL	IA	MI	OH	TN	FL	Cas	MPG	CO	Irvine			We consider selenis; cocyta; selenis/cocyta; cocyta selenis as (combinable) synonyms, however users should be aware some authorities may recognize taxon concept distinctions among these terms, especially at the subspecies level.
IL	ABS	ABS	ABS	ABS	ABS	ABS	ABS	ABS	ABS	ABS
IA	ABS	ABS	ABS	ABS	ABS	ABS	ABS	ABS	ABS	ABS
MI (P. selenis/cocyta)	Z	Z	X	EM	Z	Z	EM	EM	EM	Z
OH (P. selenis)	Z	Z	EM	X	Z	Z	EM	EM	EM	Z
TN	ABS	ABS	ABS	ABS	ABS	ABS	ABS	ABS	ABS	ABS
FL	ABS	ABS	ABS	ABS	ABS	ABS	ABS	ABS	ABS	ABS
Cas (P. cocyta)	Z	Z	EM	EM	Z	Z	X	EM	PM	Z
MPG (P. cocyta selenis)	Z	Z	EM	EM	Z	Z	EM	X	EM	Z
CO (P. cocyta)	Z	Z	EM	EM	Z	Z	PM	EM	X	Z
Irvine	ABS	ABS	ABS	ABS	ABS	ABS	ABS	ABS	ABS	ABS
Cercyonis sthenele (silvestris)	Donor												Sub-species specification deviation
Receiver	IL	IA	MI	OH	TN	FL	Cas	MPG	CO	Irvine		EM-s	Compatible at species level, but receiver has subspecies specified. If you are concerned about subspecies match, proceed with caution.
IL	ABS	ABS	ABS	ABS	ABS	ABS	ABS	ABS	ABS	ABS
IA	ABS	ABS	ABS	ABS	ABS	ABS	ABS	ABS	ABS	ABS
MI	ABS	ABS	ABS	ABS	ABS	ABS	ABS	ABS	ABS	ABS
OH	ABS	ABS	ABS	ABS	ABS	ABS	ABS	ABS	ABS	ABS
TN	ABS	ABS	ABS	ABS	ABS	ABS	ABS	ABS	ABS	ABS
FL	ABS	ABS	ABS	ABS	ABS	ABS	ABS	ABS	ABS	ABS
Cas (C. sthenele)	Z	Z	Z	Z	Z	Z	X	Z	PM	EM-s
MPG	ABS	ABS	ABS	ABS	ABS	ABS	ABS	ABS	ABS	ABS
CO - (C. sthenele)	Z	Z	Z	Z	Z	Z	PM	Z	X	EM-s
Irvine - (C. sthenele silvestris)	Z	Z	Z	Z	Z	Z	EM-s	Z	EM-s	X
Coenonympha tullia (california)	Donor												Sub-species specification deviation
Receiver	IL	IA	MI	OH	TN	FL	Cas	MPG	CO	Irvine		EM-s	Compatible at species level, but receiver has subspecies specified. If you are concerned about subspecies match, proceed with caution.
IL	ABS	ABS	ABS	ABS	ABS	ABS	ABS	ABS	ABS	ABS
IA - C. tullia	Z	X	PM	PM	Z	Z	PM	PM	PM	EM-s
MI - C. tullia	Z	PM	X	PM	Z	Z	PM	PM	PM	EM-s
OH - C. tullia	Z	PM	PM	X	Z	Z	PM	PM	PM	EM-s
TN	ABS	ABS	ABS	ABS	ABS	ABS	ABS	ABS	ABS	ABS
FL	ABS	ABS	ABS	ABS	ABS	ABS	ABS	ABS	ABS	ABS
Cas - C. tullia	Z	PM	PM	PM	Z	Z	X	PM	PM	EM-s
MPG - C. tullia	Z	PM	PM	PM	Z	Z	PM	X	PM	EM-s
CO - C. tullia	Z	PM	PM	PM	Z	Z	PM	PM	X	EM-s
Irvine - C. tullia california	Z	EM-s	EM-s	EM-s	Z	Z	EM-s	EM-s	EM-s	X
Colias alexandra (harfordii)	Donor												Sub-species specification deviation with hidden species deviation
Receiver	IL	IA	MI	OH	TN	FL	Cas	MPG	CO	Irvine		EM-s	Pelham and O&W consider harfordii a separate species from alexandra. Irvine deviates from O&W on this. User should assess compatibility.
IL	ABS	ABS	ABS	ABS	ABS	ABS	ABS	ABS	ABS	ABS		Z	These receivers consider harfordii a distinct species from alexandra, so not compatible at species level. User should assess compatibility
IA	ABS	ABS	ABS	ABS	ABS	ABS	ABS	ABS	ABS	ABS
MI	ABS	ABS	ABS	ABS	ABS	ABS	ABS	ABS	ABS	ABS
OH	ABS	ABS	ABS	ABS	ABS	ABS	ABS	ABS	ABS	ABS
TN	ABS	ABS	ABS	ABS	ABS	ABS	ABS	ABS	ABS	ABS
FL	ABS	ABS	ABS	ABS	ABS	ABS	ABS	ABS	ABS	ABS
Cas (C. alexandra)	Z	Z	Z	Z	Z	Z	X	PM	PM	Z
MPG (C. alexandra)	Z	Z	Z	Z	Z	Z	PM	X	PM	Z
CO (C. alexandra)	Z	Z	Z	Z	Z	Z	PM	PM	X	Z
Irvine (C. alexandra harfordii)	Z	Z	Z	Z	Z	Z	EM-s	EM-s	EM-s	X
Euphyes vestris (harbisoni)	Donor												Sub-species specification deviation
Receiver	IL	IA	MI	OH	TN	FL	Cas	MPG	CO	Irvine		EM-s	Compatible at species level, but receiver has subspecies specified. If you are concerned about subspecies match, proceed with caution.
IL - E. vestris	X	PM	PM	PM	PM	PM	PM	Z	PM	EM-s
IA - E. vestris	PM	X	PM	PM	PM	PM	PM	Z	PM	EM-s
MI - E. vestris	PM	PM	X	PM	PM	PM	PM	Z	PM	EM-s
OH - E. vestris	PM	PM		X	PM	PM	PM	Z	PM	EM-s
TN - E. vestris	PM	PM	PM	PM	X	PM	PM	Z	PM	EM-s
FL - E. vestris	PM	PM	PM	PM	PM	X	PM	Z	PM	EM-s
Cas - E. vestris	PM	PM	PM	PM	PM	PM	X	Z	PM	EM-s
MPG	ABS	ABS	ABS	ABS	ABS	ABS	ABS	ABS	ABS	ABS
CO - E. vestris	PM	PM	PM	PM	PM	PM	PM	Z	X	EM-s
Irvine - E> vestris harbisoni	EM-s	EM-s	EM-s	EM-s	EM-s	EM-s	EM-s	Z	EM-s	X
Speyeria callippe (comstocki)	Donor												Sub-species specification deviation
Receiver	IL	IA	MI	OH	TN	FL	Cas	MPG	CO	Irvine		EM-s	Compatible at species level, but receiver has subspecies specified. If you are concerned about subspecies match, proceed with caution.
IL	ABS	ABS	ABS	ABS	ABS	ABS	ABS	ABS	ABS	ABS
IA	ABS	ABS	ABS	ABS	ABS	ABS	ABS	ABS	ABS	ABS
MI	ABS	ABS	ABS	ABS	ABS	ABS	ABS	ABS	ABS	ABS
OH	ABS	ABS	ABS	ABS	ABS	ABS	ABS	ABS	ABS	ABS
TN	ABS	ABS	ABS	ABS	ABS	ABS	ABS	ABS	ABS	ABS
FL	ABS	ABS	ABS	ABS	ABS	ABS	ABS	ABS	ABS	ABS
Cas (S. callippe)	Z	Z	Z	Z	Z	Z	X	PM	PM	EM-s
MPG (S. callippe)	Z	Z	Z	Z	Z	Z	PM	X	PM	EM-s
CO (S. callippe)	Z	Z	Z	Z	Z	Z	PM	PM	X	EM-s
Irvine (S. callippe comstocki)	Z	Z	Z	Z	Z	Z	EM-s	EM-s	EM-s	X
Speyeria cybele (leto)	Donor												Sub-species specification deviation
Receiver	IL	IA	MI	OH	TN	FL	Cas	MPG	CO	Irvine		EM-s	Compatible at species level, but receiver has subspecies specified. If you are concerned about subspecies match, proceed with caution.
IL (S. cybele)	X	PM	PM	PM	PM	PM	PM	EM-s	PM	Z
IA (S. cybele)	PM	X	PM	PM	PM	PM	PM	EM-s	PM	Z
MI (S. cybele)	PM	PM	X	PM	PM	PM	PM	EM-s	PM	Z
OH (S. cybele)	PM	PM	PM	X	PM	PM	PM	EM-s	PM	Z
TN (S. cybele)	PM	PM	PM	PM	X	PM	PM	EM-s	PM	Z
FL (S. cybele)	PM	PM	PM	PM	PM	X	PM	EM-s	PM	Z
Cas (S. cybele)	PM	PM	PM	PM	PM	PM	X	EM-s	PM	Z
MPG (S. cybele leto)	EM-s	EM-s	EM-s	EM-s	EM-s	EM-s	EM-s	X	EM-s	Z
CO (S. cybele)	PM	PM	PM	PM	PM	PM	PM	EM-s	X	Z
Irvine	ABS	ABS	ABS	ABS	ABS	ABS	ABS	ABS	ABS	ABS
Hesperia colorado (idaho)	Donor												Sub-species specification deviation
Receiver	IL	IA	MI	OH	TN	Cas	MPG	CO	Irvine	FL		EM-s	Compatible at species level, but receiver has subspecies specified. If you are concerned about subspecies match, proceed with caution.
IL	ABS	ABS	ABS	ABS	ABS	ABS	ABS	ABS	ABS	ABS
IA	ABS	ABS	ABS	ABS	ABS	ABS	ABS	ABS	ABS	ABS
MI	ABS	ABS	ABS	ABS	ABS	ABS	ABS	ABS	ABS	ABS
OH	ABS	ABS	ABS	ABS	ABS	ABS	ABS	ABS	ABS	ABS
TN	ABS	ABS	ABS	ABS	ABS	ABS	ABS	ABS	ABS	ABS
Cas (H. colorado)	Z	Z	Z	Z	Z	X	EM-s	PM	PM	Z
MPG (H. colorado idaho)	Z	Z	Z	Z	Z	EM-s	X	EM-s	EM-s	Z
CO (H. colorado)	Z	Z	Z	Z	Z	PM	EM-s	X	PM	Z
Irvine (H. colorado)	Z	Z	Z	Z	Z	PM	EM-s		X	Z
FL	ABS	ABS	ABS	ABS	ABS	ABS	ABS	ABS	ABS	ABS
Erynnis brizo (brizo)	Donor												Sub-species specification deviation
Receiver	IL	IA	MI	OH	TN	Cas	MPG	CO	Irvine	FL		EM-s	Compatible at species level, but receiver has subspecies specified. If you are concerned about subspecies match, proceed with caution.
IL (E. brizo)	X	PM	PM	EM-s	PM	Z	Z	PM	Z	PM
IA (E. brizo)	PM	X	PM	EM-s	PM	Z	Z	PM	Z	PM
MI (E. brizo)	PM	PM	X	EM-s	PM	Z	Z	PM	Z	PM
OH (E. brizo brizo)	EM-s	EM-s	EM-s	X	EM-s	Z	Z	EM-s	Z	EM-s
TN (E. brizo)	PM	PM	PM	EM-s	X	Z	Z	PM	Z	PM
Cas	ABS	ABS	ABS	ABS	ABS	ABS	ABS	ABS	ABS	ABS
MPG	ABS	ABS	ABS	ABS	ABS	ABS	ABS	ABS	ABS	ABS
CO (E. brizo)	PM	PM	PM	EM-s	PM	Z	Z	X	Z	PM
Irvine	ABS	ABS	ABS	ABS	ABS	ABS	ABS	ABS	ABS	ABS
FL (E. brizo)	PM	PM	PM	EM-s	PM	Z	Z	PM	Z	X
Megisto cymela (cymela-viola)	Donor												Multiple subspecies specification deviations
Receiver	IL	IA	MI	OH	TN	FL	Cas	MPG	CO	Irvine		MM	Florida returns more than 1 subspecies
IL (M. cymela)	X	PM	PM	PM	PM	MM	Z	Z	PM	Z		Com	Return from donor is only compatible when receiver includes both subspecies in analysis
IA (M. cymela)	PM	X	PM	PM	PM	MM	Z	Z	PM	Z
MI (M. cymela)	PM	PM	X	PM	PM	MM	Z	Z	PM	Z
OH (M. cymela)	PM	PM	PM	X	PM	MM	Z	Z	PM	Z
TN (M. cymela)	PM	PM	PM	PM	X	MM	Z	Z	PM	Z
FL (Megisto cymela cymela)	Com	Com	Com	Com	Com	X	Z	Z	Com	Z
FL (Megisto cymela viola)	Com	Com	Com	Com	Com	X	Z	Z	Com	Z
Cas	ABS	ABS	ABS	ABS	ABS	ABS	ABS	ABS	ABS	ABS
MPG	ABS	ABS	ABS	ABS	ABS	ABS	ABS	ABS	ABS	ABS
CO (M. cymela)	PM	PM	PM	PM	PM	MM	Z	Z	X	Z
Irvine	ABS	ABS	ABS	ABS	ABS	ABS	ABS	ABS	ABS	ABS
Plebejus lupini (lupini-texanus)	Donor												Multiple subspecies specification deviations
Receiver	IL	IA	MI	OH	TN	FL	Cas	MPG	CO	Irvine		MM	CO returns more than 1 subspecies
IL	ABS	ABS	ABS	ABS	ABS	ABS	ABS	ABS	ABS	ABS		Com	Return from donor is only compatible when receiver (CO) includes both subspecies in analysis
IA	ABS	ABS	ABS	ABS	ABS	ABS	ABS	ABS	ABS	ABS
MI	ABS	ABS	ABS	ABS	ABS	ABS	ABS	ABS	ABS	ABS
OH	ABS	ABS	ABS	ABS	ABS	ABS	ABS	ABS	ABS	ABS
TN	ABS	ABS	ABS	ABS	ABS	ABS	ABS	ABS	ABS	ABS
FL	ABS	ABS	ABS	ABS	ABS	ABS	ABS	ABS	ABS	ABS
Cas (P. lupini)	Z	Z	Z	Z	Z	Z	X	PM	MM	Z
MPG (P. lupini)	Z	Z	Z	Z	Z	Z	PM	X	MM	Z
CO (P.l. lupini)	Z	Z	Z	Z	Z	Z	Com	Com	X	Z
CO (P.l. texanus)	Z	Z	Z	Z	Z	Z	Com	Com	X	Z
Irvine	ABS	ABS	ABS	ABS	ABS	ABS	ABS	ABS	ABS	ABS
Colias eurytheme; C. eurytheme/philodice	Donor												Species conglomerate
Receiver	IL	IA	MI	OH	TN	FL	Cas	MPG	CO	Irvine			Input for TN and IL is a conglomerate of two species: C. eurytheme/philodice
IL (C. euytheme/philodice)	X	MM	MM	MM	PM	MM	MM	MM	MM	EM,Z		MM	Returns multiple species matches: C. eurytheme and C. philodice. Compatible only if both species from donor included in combined analysis. User must assess.
IA (C. eurytheme)	Com	X	PM	PM	Com	PM	PM	PM	PM	PM		Com	Return (C. eurytheme/philodice) doesn't match receiver request unless receiver includes both species (C. eurytheme and C. philodice). User must assess.
MI (C. eurytheme)	Com	PM	X	PM	Com	PM	PM	PM	PM	PM		Com*	Return (C. eurytheme/philodice) is not comparable because receiver (Irvine) collects data only for one of the species (C. eurytheme). User must assess.
OH (C. eurytheme)	Com	PM	PM	X	Com	PM	PM	PM	PM	PM		EM,Z	Returns an equivalent match for only one of the species (C. eurytheme) involved in input conglomerate. User must assess.
TN (C. euytheme/philodice)		MM	MM	MM	X	MM	MM	MM	MM	EM,Z		X	This project only has one of the species (C. eurytheme), so a return containing the conglomerate is not compatible (com*). User must assess.
FL (C. eurytheme)	Com	PM	PM	PM	Com	X	PM	PM	PM	PM
Cas (C. eurytheme)	Com	PM	PM	PM	Com	PM	X	PM	PM	PM
MPG (C. eurytheme)	Com	PM	PM	PM	Com	PM	PM	X	PM	PM
CO (C. eurytheme)	Com	PM	PM	PM	Com	PM	PM	PM	X	PM
Irvine (C. eurytheme) X	Com*	PM	PM	PM	Com*	PM	PM	PM	PM	X
Colias philodice; C. eurytheme/philodice	Donor												Species conglomerate
Receiver	IL	IA	MI	OH	TN	FL	Cas	MPG	CO	Irvine			TN collects two species together in the field as C. eurytheme/philodice
IL (C. euytheme/philodice)	X	MM	MM	MM	PM	MM	MM	MM	MM	EM,Z		MM	Returns multiple species matches: C. eurytheme and C. philodice. Compatible only if both species from donor included in combined analysis. User must assess.
IA C. philodice	Com	X	PM	PM	Com	PM	PM	PM	PM	Z		Com	Return (C. eurytheme/philodice) doesn't match receiver request unless receiver includes both species (C. eurytheme and C. philodice). User must assess.
MI C. philodice	Com	PM	X	PM	Com	PM	PM	PM	PM	Z		EM,Z	Returns an equivalent match for only one of the species (C. eurytheme) involved in input conglomerate. User must assess.
OH C. philodice	Com	PM	PM	X	Com	PM	PM	PM	PM	Z		X	This project only has one of the species (C. eurytheme) in the conglomerate.
TN (C. euytheme/philodice)	PM	MM	MM	MM	X	MM	MM	MM	MM	EM,Z
FL C. philodice	Com	PM	PM	PM	Com	X	PM	PM	PM	Z
Cas C. philodice	Com	PM	PM	PM	Com	PM	X	PM	PM	Z
MPG C. philodice	Com	PM	PM	PM	Com	PM	PM	X	PM	Z
CO C. philodice	Com	PM	PM	PM	Com	PM	PM	PM	X	Z
Irvine X	ABS	ABS	ABS	ABS	ABS	ABS	ABS	ABS	ABS	ABS
Pyrgus communis; P. communis/albescens	Donor												Species conglomerate
Receiver	IL	IA	MI	OH	TN	FL	Cas	MPG	CO	Irvine			TN collects two species together in the field as P. communis/albescens.
IL X (P. communis)	X	PM	PM	PM	Com*	PM	PM	PM	PM	Z		MM	Donor returns multiple matching species: P. communis and P. albescens. Flag indicates data comparable only if both species included. User must assess.
IA X (P. communis)	PM	X	PM	PM	Com*	PM	PM	PM	PM	Z		Com	Donor returns P. communis/albescens conglomerate; both species occur at receiver program. Flag: comparable if receiver includes both species when combining. User must assess.
MI X (P. communis)	PM	PM	X	PM	Com*	PM	PM	PM	PM	Z		Com*	Donor returns P.communis/albescens conglomerate but only one of the species occurs at receiver program. Flag: not compatible between programs. User must assess.
OH X (P. communis)	PM	PM	PM	X	Com*	PM	PM	PM	PM	Z		EM,Z	Donor returns only one of the two species (C. communis) from the receiver conglomerate. User must determine compatibility.
TN (P. communis/albescens)	EM,Z	EM,Z	EM,Z	EM,Z	X	MM	EM,Z	EM,Z	EM,Z	Z,EM		Z,EM	Donor returns only one of the two species (C. albescens) from the receiver conglomerate. User must determine compatibility.
FL (P. communis)	PM	PM	PM	PM	Com	X	PM	PM	PM	Z		X	This project only has one or the other species, so a return containing the conglomerate is not compatible (com*). User must assess.
Cas X (P. communis)	PM	PM	PM	PM	Com*	PM	X	PM	PM	Z
MPG X (P. communis)	PM	PM	PM	PM	Com*	PM	PM	X	PM	Z
CO X (P. communis)	PM	PM	PM	PM	Com*	PM	PM	PM	X	Z
Irvine X	ABS	ABS	ABS	ABS	ABS	ABS	ABS	ABS	ABS	ABS
Pyrgus albescens; P. communis/albescens	Donor												Species conglomerate
Receiver	IL	IA	MI	OH	TN	FL	Cas	MPG	CO	Irvine			TN collects two species together in the field as P. communis/albescens.
IL X	ABS	ABS	ABS	ABS	ABS	ABS	ABS	ABS	ABS	ABS		MM	Donor returns multiple matching species: P. communis and P. albescens. Flag indicates data comparable only if both species included. User must assess.
IA X	ABS	ABS	ABS	ABS	ABS	ABS	ABS	ABS	ABS	ABS		Com	Donor returns P. communis/albescens conglomerate; both species occur at receiver program. Flag: comparable if receiver includes both species when combining. User must assess.
MI X	ABS	ABS	ABS	ABS	ABS	ABS	ABS	ABS	ABS	ABS		Com*	Donor returns P.communis/albescens conglomerate but only one of the species occurs at receiver program. Flag: not compatible between programs. User must assess.
OH X	ABS	ABS	ABS	ABS	ABS	ABS	ABS	ABS	ABS	ABS		EM,Z	Donor returns only one of the two species (C. communis) from the receiver conglomerate. User must determine compatibility.
TN (P. communis/albescens)	EM,Z	EM,Z	EM,Z	EM,Z	X	MM	EM,Z	EM,Z	EM,Z	Z,EM		Z,EM	Donor returns only one of the two species (C. albescens) from the receiver conglomerate. User must determine compatibility.
FL (P. albescens)	Z	Z	Z	Z	Com	X	Z	Z	Z	PM		X	This project only has one or the other species, so a return containing the conglomerate is not compatible (com*). User must assess.
Cas X	ABS	ABS	ABS	ABS	ABS	ABS	ABS	ABS	ABS	ABS
MPG X	ABS	ABS	ABS	ABS	ABS	ABS	ABS	ABS	ABS	ABS
CO X	ABS	ABS	ABS	ABS	ABS	ABS	ABS	ABS	ABS	ABS
Irvine X (P. albescens)	Z	Z	Z	Z	Com*	PM	Z	Z	Z	X
Callophrys dumetorum; C. perplexa	Donor												Species complex: subspecies promotion deviation
Receiver	IL	IA	MI	OH	TN	FL	Cas	MPG	CO	Irvine			O&W considers perplexa a distinct species. Pelham considers it a subspecies of dumetorum.
IL	ABS	ABS	ABS	ABS	ABS	ABS	ABS	ABS	ABS	ABS			The only dumetorum subspecies occuring at Cascades is perplexa (Scott, 1986).
IA	ABS	ABS	ABS	ABS	ABS	ABS	ABS	ABS	ABS	ABS			These names refer to the same taxonomic units, but user beware that some consider they don't share species level identity.
MI	ABS	ABS	ABS	ABS	ABS	ABS	ABS	ABS	ABS	ABS
OH	ABS	ABS	ABS	ABS	ABS	ABS	ABS	ABS	ABS	ABS
TN	ABS	ABS	ABS	ABS	ABS	ABS	ABS	ABS	ABS	ABS
FL	ABS	ABS	ABS	ABS	ABS	ABS	ABS	ABS	ABS	ABS
Cas (C. dumetorum)	Z	Z	Z	Z	Z	Z	X	Z	Z	EM
MPG	ABS	ABS	ABS	ABS	ABS	ABS	ABS	ABS	ABS	ABS
CO	ABS	ABS	ABS	ABS	ABS	ABS	ABS	ABS	ABS	ABS
Irvine (C. perplexa)	Z	Z	Z	Z	Z	Z	EM	Z	Z	X
Satyrium semiluna; S. fulginosum (semiluna)	Donor												Species complex: subspecies promotion deviation
Receiver	IL	IA	MI	OH	TN	FL	Cas	MPG	CO	Irvine			Pelham considers S. semiluna a distinct species from S. fulginosum. Cascades declares a deviation from Pelham and lists semiluna as subspecies.
IL	ABS	ABS	ABS	ABS	ABS	ABS	ABS	ABS	ABS	ABS			O&W considers semiluna a subspecies of S. fulginosum. Colorado declares a deviation from O&W and lists S. semiluna as a distinct species.
IA	ABS	ABS	ABS	ABS	ABS	ABS	ABS	ABS	ABS	ABS
MI	ABS	ABS	ABS	ABS	ABS	ABS	ABS	ABS	ABS	ABS
OH	ABS	ABS	ABS	ABS	ABS	ABS	ABS	ABS	ABS	ABS
TN	ABS	ABS	ABS	ABS	ABS	ABS	ABS	ABS	ABS	ABS
FL	ABS	ABS	ABS	ABS	ABS	ABS	ABS	ABS	ABS	ABS
Cas (S. fulginosum semiluna)	Z	Z	Z	Z	Z	Z	X	Z	EM	Z
MPG	ABS	ABS	ABS	ABS	ABS	ABS	ABS	ABS	ABS	ABS
CO (S. semiluna)	Z	Z	Z	Z	Z	Z	EM	Z	X	Z
Irvine	ABS	ABS	ABS	ABS	ABS	ABS	ABS	ABS	ABS	ABS
Polygonia gracilis; P. zephyrus; P. g. zephrys	Donor												Species complex: subspecies promotion deviation
Receiver	IL	IA	MI	OH	TN	FL	Cas	MPG	CO	Irvine			P. gracilis gracilis only occurs in far north (Canada). Only zephrys occurs at these 10 programs.
IL	ABS	ABS	ABS	ABS	ABS	ABS	ABS	ABS	ABS	ABS			Cascades (Pelham): P. gracilis includes P. g. gracilis and P. g. zephrys
IA	ABS	ABS	ABS	ABS	ABS	ABS	ABS	ABS	ABS	ABS			CO (O&W): P. zephrys is distinct species from P. gracilis.
MI	ABS	ABS	ABS	ABS	ABS	ABS	ABS	ABS	ABS	ABS		MM	CO returns both P. gracilis and P. zephrys to Cas request for P. gracilis. User should assess; P. gracilis may not occur at CO.
OH	ABS	ABS	ABS	ABS	ABS	ABS	ABS	ABS	ABS	ABS		EM-s	Cas returns P. gracilis (which includes zephrys) to MPG request for P. g. zephrys. User should assess compatibility since geography indicates gracilis does not occur at Cas.
TN	ABS	ABS	ABS	ABS	ABS	ABS	ABS	ABS	ABS	ABS		COM*	Cas returns P. gracilis (includes gracilis and zephrys) to CO request for P. zephrys. User should assess compatibility since geography indicates gracilis does not occur at Cas.
FL	ABS	ABS	ABS	ABS	ABS	ABS	ABS	ABS	ABS	ABS
Cas (P. gracilis)	Z	Z	Z	Z	Z	Z	X	EM-s	MM	Z
MPG (P. g. zephrys)	Z	Z	Z	Z	Z	Z	EM-s	X	EM-s	Z
CO P. zephrys	Z	Z	Z	Z	Z	Z	COM*	EM-s	X	Z
Irvine	ABS	ABS	ABS	ABS	ABS	ABS	ABS	ABS	ABS	ABS
Colias alexandra (harfordii)	Donor												Subspecies specification deviation with hidden subspecies promotion deviation
Receiver	IL	IA	MI	OH	TN	FL	Cas	MPG	CO	Irvine			Pelham and O&W consider harfordii a separate species from alexandra, (NABA consider harfordii a subspecies of alexandra).
IL	ABS	ABS	ABS	ABS	ABS	ABS	ABS	ABS	ABS	ABS			Irvine deviates from O&W and considers harfordii a subspecies of alexandra.
IA	ABS	ABS	ABS	ABS	ABS	ABS	ABS	ABS	ABS	ABS			harfordii occurs only in S. california
MI	ABS	ABS	ABS	ABS	ABS	ABS	ABS	ABS	ABS	ABS		Z	Cas, MPG, CO (Pelham/O&W-based) consider harfordii a distinct species, so incompatible with C. alexandra harfordii at the species level. User should assess their taxonomic perspective and associated compatibility.
OH	ABS	ABS	ABS	ABS	ABS	ABS	ABS	ABS	ABS	ABS		EM-s	Irvine deviates from O&W in considering harfordii a subspecies of alexandra. If you are concerned about subspecies match, you should assess compatibility
TN	ABS	ABS	ABS	ABS	ABS	ABS	ABS	ABS	ABS	ABS
FL	ABS	ABS	ABS	ABS	ABS	ABS	ABS	ABS	ABS	ABS
Cas (C. alexandra)	Z	Z	Z	Z	Z	Z	X	PM	PM	Z
MPG (C. alexandra)	Z	Z	Z	Z	Z	Z	PM	X	PM	Z
CO (C. alexandra)	Z	Z	Z	Z	Z	Z	PM	PM	X	Z
Irvine (C. alexandra harfordii)	Z	Z	Z	Z	Z	Z	EM-s	EM-s	EM-s	X
Plebejus/Lycaeides melissa (samuelis)	Donor												Genus deviation, subspecies specification with hidden subspecies promotion deviation
Receiver	IL	IA	MI	OH	TN	FL	Cas	MPG	CO	Irvine			Pelham considers P. samuelis a distinct species from P. melissa. O&W, NABA consider samuelis a subspecies (P. melissa samuelis)
IL (Plebejus melissa)	X	sub	EM	EM	Z	Z	PM-s	PM-s	sub	Z			samuelis occurs in IL, IN, MI, MN, NH, NY, OH, WI (see https://nhpbs.org/wild/karner.asp)
IA (Lycaeides melissa)	sub	X	sub	sub	Z	Z	EM	EM	EM	Z		Z	Receiver (Pelham based) promotes L. m. samuelis to a distinct species, incompatible with P. melissa
MI (Lycaeides melissa samuelis)	EM	sub	X	PM	Z	Z	EM-s	EM-s	sub	Z		sub	User beware: subspecies may not match. If this concerns you, you should assess compatibility
OH (Lycaeides melissa samuelis)	EM	sub	PM	X	Z	Z	EM-s	EM-s	sub	Z		EM-s	Receiver (O&W, NABA-based) considers L. m. samuelis and P. melissa compatible at species level, however Pelham-based donors (Cas, MPG) consider samuelis a distinct species. User should assess compatibility.
TN	ABS	ABS	ABS	ABS	ABS	ABS	ABS	ABS	ABS	ABS		PM/inc	User beware: geography identifies donor taxon as subspecies samuelis. Receiver (Pelham based) promotes L. m. samuelis to a distinct species, incompatible with P. melissa
FL	ABS	ABS	ABS	ABS	ABS	ABS	ABS	ABS	ABS	ABS		PM-s	IL subspecies identity is geography specified but is not taxonomically specified (i.e. hidden). If you are concerned about subspecies match, you should assess compatibility.
Cas (Plebejus melissa)	PM/inc	EM	Z	Z	Z	Z	X	PM	PM	Z
MPG (Plebejus melissa)	PM/inc	EM	Z	Z	Z	Z	PM	X	PM	Z
CO (Plebejus melissa)	sub	EM	sub	sub	Z	Z	PM	PM	X	Z
Irvine	ABS	ABS	ABS	ABS	ABS	ABS	ABS	ABS	ABS	ABS
Adelpha bredowii; A. californica; A. eulalia	Donor												Species complex - taxonomic revision.
Receiver	IL	IA	MI	OH	TN	FL	Cas	MPG	CO	Irvine			Our three authorities disagree on taxon concepts involved with these names. User should assess compatibility of these taxa and/or revisit their use of this taxonomic concept.
IL	ABS	ABS	ABS	ABS	ABS	ABS	ABS	ABS	ABS	ABS			Cascades (Pelham) considers A. bredowii, A. eulalia and A. californica distinct taxa and A. bredowii as extralimital (not occurring in North America).
IA	ABS	ABS	ABS	ABS	ABS	ABS	ABS	ABS	ABS	ABS			Irvine (O&W base) considers A. bredowii to include eulalia and californica.
MI	ABS	ABS	ABS	ABS	ABS	ABS	ABS	ABS	ABS	ABS			Colorado (O&W base) specifically deviates from OW to use the Pelham interpretation of these taxa.
OH	ABS	ABS	ABS	ABS	ABS	ABS	ABS	ABS	ABS	ABS			californica occurs along the west coast from Cascades to Irvine. eulalia is a more eastern, discontinuous distribution occuring from Colorado south into Mexico.
TN	ABS	ABS	ABS	ABS	ABS	ABS	ABS	ABS	ABS	ABS			See: http://www.butterfliesofamerica.com/docs/Adelpha_bredowii.pdf
FL	ABS	ABS	ABS	ABS	ABS	ABS	ABS	ABS	ABS	ABS		Z	Colorado-Irvine and Irvine-Colorado requests are not symetrically equivalent. Both require flags.
Cas (A. californica)	Z	Z	Z	Z	Z	Z	X	Z	Z	EM
MPG	ABS	ABS	ABS	ABS	ABS	ABS	ABS	ABS	ABS	ABS
CO (A. eulalia)	Z	Z	Z	Z	Z	Z	Z	Z	X	Z
Irvine (A. bredowii)	Z	Z	Z	Z	Z	Z	EM	Z	EM	X
Euphydryas colon-chalcedona	Donor												Species complex - taxonomic revision.
Receiver	IL	IA	MI	OH	TN	Cas	MPG	CO	Irvine	FL			MPG and Cas (Pelham) consider colon and chalcedona separate species
IL	ABS	ABS	ABS	ABS	ABS	ABS	ABS	ABS	ABS	ABS			Irvine (O&W) considers colon and chalcedona conspecific
IA	ABS	ABS	ABS	ABS	ABS	ABS	ABS	ABS	ABS	ABS			chalcedona does occur at MPG or Cas (only Irvine)
MI	ABS	ABS	ABS	ABS	ABS	ABS	ABS	ABS	ABS	ABS		Z	Cas-Irvine and Irvine-Cas requests are not symetrically equivalent. These require flags.
OH	ABS	ABS	ABS	ABS	ABS	ABS	ABS	ABS	ABS	ABS		Z	MPG-Irvine and Irvine-MPG requests are not symetrically equivalent. These require flags.
TN	ABS	ABS	ABS	ABS	ABS	ABS	ABS	ABS	ABS	ABS
Cas (E. colon)	Z	Z	Z	Z	Z	X	PM	Z	Z	Z
MPG (E. colon)	Z	Z	Z	Z	Z	PM	X	Z	Z	Z
CO	ABS	ABS	ABS	ABS	ABS	ABS	ABS	ABS	ABS	ABS
Irvine (E. chalcedona)	Z	Z	Z	Z	Z	EM	EM	Z	X	Z
FL	ABS	ABS	ABS	ABS	ABS	ABS	ABS	ABS	ABS	ABS
Euphilotes "battoides"; E. "battoides"on heracleoides; E. battoides	Donor												Species complex - poorly known.
Receiver	IL	IA	MI	OH	TN	FL	Cas	MPG	CO	Irvine			Irvine (O&W base) includes glaucon within battoides (presumably). But glaucon does not occur at irvine.
IL	ABS	ABS	ABS	ABS	ABS	ABS	ABS	ABS	ABS	ABS			Cascades and MPG (Pelham) consider E. glaucon a distinct species from E. "battoides," not formally described (Pelham 2014; Pelham J. Pers. comm. 2017).
IA	ABS	ABS	ABS	ABS	ABS	ABS	ABS	ABS	ABS	ABS			Cascades "battoides" includes only the "on-heracleoides" (geog=cascadia) "segregate"/subsp;
MI	ABS	ABS	ABS	ABS	ABS	ABS	ABS	ABS	ABS	ABS		EM	MPG may include others and perhaps not the "on-heracleoides" segregate. Thus Cas, Irvine and MPG are not necessarily compatible. User beware.
OH	ABS	ABS	ABS	ABS	ABS	ABS	ABS	ABS	ABS	ABS		MM	User beware - requests are not symmetrical in both directions. Flags needed. Irvine requires E. battoides and E. glaucon from Cas and MPG.
FL	ABS	ABS	ABS	ABS	ABS	ABS	ABS	ABS	ABS	ABS			Because the species status of "battoides" is unclear, user must assess compatibility of all comparisons.
TN	ABS	ABS	ABS	ABS	ABS	ABS	ABS	ABS	ABS	ABS			See Warren 2005 Butterflies of Oregon: https://dspace.library.colostate.edu/bitstream/handle/10217/81121/BSPMGILL_LepidopteraofNorthAmerica6.pdf?sequence=1
Cas (E. "battoides" heracleoides feeder)	Z	Z	Z	Z	Z	Z	X	EM	Z	EM
MPG (E. "battoides")	Z	Z	Z	Z	Z	Z	EM	X	Z	EM
CO	ABS	ABS	ABS	ABS	ABS	ABS	ABS	ABS	ABS	ABS
Irvine (E. battoides)	Z	Z	Z	Z	Z	Z	MM	MM	Z	X
Speyeria atlantis-hesperis	Donor												Species complex: Subspecies promotion deviation
Receiver	IL	IA	MI	OH	TN	Cas	MPG	CO	Irvine	FL			MI and OH (NABA) consider hesperis a subspecies of atlantis. hesperis does not occur at MI or OH
IL	ABS	ABS	ABS	ABS	ABS	ABS	ABS	ABS	ABS	ABS			MPG, Cas (Pelham) and CO (O&W) consider S. atlantis and S. hesperis separate species
IA	ABS	ABS	ABS	ABS	ABS	ABS	ABS	ABS	ABS	ABS			Requests are not symmetrical in both directions, because of different interpretation of species level between NABA-based and O&W/Pelham-based lists.
MI (S. atlantis)	Z	Z	X	PM	Z	MM	MM	MM	Z	Z		MM	When Mi, OH request S. atlantis equivalents from Cas, MPG or CO, S. hesperis and S. atlantis both need to be returned to match NABA species concept. User should assess.
OH (S. atlantis)	Z	Z	PM	X	Z	MM	MM	MM	Z	Z		EM	Coded as "equivalent match" because the concepts are different, but outcome is compatible as hesperis does not occur in MI or OH. User should assess.
TN	ABS	ABS	ABS	ABS	ABS	ABS	ABS	ABS	ABS	ABS
Cas (S. atlantis)	Z	Z	EM	EM	Z	X	PM	PM	Z	Z
Cas (S. hesperis)	Z	Z	Z	Z	Z	X	PM	PM	Z	Z
MPG (S. atlantis)	Z	Z	EM	EM	Z	PM	X	PM	Z	Z
MPG (S. hesperis)	Z	Z	Z	Z	Z	PM	X	PM	Z	Z
CO (S. atlantis)	Z	Z	EM	EM	Z	PM	PM	X	Z	Z
CO (S. hesperis)	Z	Z	Z	Z	Z	PM	PM	X	Z	Z
Irvine	ABS	ABS	ABS	ABS	ABS	ABS	ABS	ABS	ABS	ABS
FL	ABS	ABS	ABS	ABS	ABS	ABS	ABS	ABS	ABS	ABS
Callophrys gryneus (nelsoni)- C. nelsoni	Donor												Species complex: Subspecies promotion deviation. Problem only evident because of geographical concerns.
Receiver	IL	IA	MI	OH	TN	Cas	MPG	CO	Irvine	FL			IL, IA, MI, OH, TN, Cas, MPG (NABA, Pelham bases) consider nelsoni a subspecies of gryneus
IL C. gryneus (sensu NABA)	X	PM	PM	PM	PM	PM	Z	PM	Z	PM			Colorado and Florida (O&W) consider C. nelsoni a separate species from C. gryneus.
IA C. gryneus (sensu NABA)	PM	X	PM	PM	PM	PM	Z	PM	Z	PM			The entity at Cascades (C. gryneus) is known by geography to be nelsoni (Scott, 1986).
MI C. gryneus (sensu NABA)	PM	PM	X	PM	PM	PM	Z	PM	Z	PM			O&W-based lists (FL, Irvine, CO) consider Cas "C. gryneus" to be C. nelsoni, thus not compatible with C. gryneus at the species level.
OH C. gryneus (sensu NABA)	PM	PM	PM	X	PM	PM	Z	PM	Z	PM			Because of difference in interpretation of species level, requests are not symmetrical in both directions (Cas-->FL not equal to FL--> Cas
TN C. gryneus (sensu NABA)	PM	PM	PM	PM	X	PM	Z	PM	Z	PM		Z	To FL and CO (nelsoni=species concept), the entity at Cas is a different species (C. nelsoni) and C. gryneus does not occur there to be combined. User should assess.
Cas C. gryneus (= C.g.nelsoni sensu Pel)	PM	PM	PM	PM	PM	X	Z	PM	Z	PM		PM	Perfect match under nelsoni=subspecies concept. User should assess.
MPG	ABS	ABS	ABS	ABS	ABS	ABS	ABS	ABS	ABS	ABS
CO C. gryneus (sensu O&W)	PM	PM	PM	PM	PM	Z	Z	X	Z	PM
Irvine	ABS	ABS	ABS	ABS	ABS	ABS	ABS	ABS	ABS	ABS
FL C. gryneus (sensu O&W)	PM	PM	PM	PM	PM	Z	Z	PM	Z	X
Anthocharis sara-thoosa-julia	Donor												Species complex - Subspecies promotion deviation
Receiver	IL	IA	MI	OH	TN	FL	Cas	MPG	CO	Irvine			Cas (Pelham) A. sara includes ssp sara, stella, thoosa, julia. Geography (Stout 2018): only julia occurs at Cas
IL	ABS	ABS	ABS	ABS	ABS	ABS	ABS	ABS	ABS	ABS			MPG (Pelham) A. sara includes ssp sara, stella, thoosa, julia. Geography (Stout 2018): only julia occurs at MPG
IA	ABS	ABS	ABS	ABS	ABS	ABS	ABS	ABS	ABS	ABS			CO (O&W) = A. sara, A. stella A. thoosa, A. julia are all distinct species. Geography (Stout 2018): A. thoosa and A. julia occur at CO
MI	ABS	ABS	ABS	ABS	ABS	ABS	ABS	ABS	ABS	ABS			Irvine (O&W) = = A. sara, A. stella A. thoosa, A. julia are all distinct species. Geography (Stout 2018): only A. sara occurs at Irvine
OH	ABS	ABS	ABS	ABS	ABS	ABS	ABS	ABS	ABS	ABS		EM	Requests are not symmetrical in both directions, because of different interpretation of species level. User must assess.
TN	ABS	ABS	ABS	ABS	ABS	ABS	ABS	ABS	ABS	ABS		Z	Requests are not symmetrical in both directions, because of different interpretation of species level. User must assess.
FL	ABS	ABS	ABS	ABS	ABS	ABS	ABS	ABS	ABS	ABS		EM	From the O&W perspective, A. julia at CO is exactly the same as A. sara at Cas and MPG. But From Pelham perspective, this would be Com - CO julia and thoosa should be considered together as A. sara.
Cas (A. sara sensu Pelham)	Z	Z	Z	Z	Z	Z	X	PM	MM	EM
MPG (A. sara sensu Pelham)	Z	Z	Z	Z	Z	Z	PM	X	MM	EM
CO (A. julia sensu O&W)	Z	Z	Z	Z	Z	Z	EM	EM	X	Z
CO (A. thoosa sensu O&W)	Z	Z	Z	Z	Z	Z	Z	Z	X	Z
Irvine (A. sara sensu O&W)	Z	Z	Z	Z	Z	Z	Z	Z	Z	X
