# Supplementary material for: A novel curation system to facilitate data integration across regional citizen science survey programs
Source: PeerJ. 2020 Jul 29;8:e9219. doi: 10.7717/peerj.9219 (PMC7395600; doi:10.7717/peerj.9219)
Supplement: Supplemental Information 7 — Program abbreviations are given in Table 5, with the exception of Orange County, which is abbreviated Orange here. Prediction abbreviations are as described in Supplemental Table S4. [file peerj-08-9219-s007.xlsx]

## Sheet: S5 - tool tests
Start (Receiver) Program	Input	End (Donor) Program	Prediction	Flag	Expected Output	Actual Tool output	Comment
IA	Achalarus lyciades	IL	PM		Achalarus lyciades	Achalarus lyciades	Species name and concept is consistent across all programs where it occurs
MI	Achalarus lyciades	IL	PM		Achalarus lyciades	Achalarus lyciades	Species name and concept is consistent across all programs where it occurs
OH	Achalarus lyciades	IL	PM		Achalarus lyciades	Achalarus lyciades	Species name and concept is consistent across all programs where it occurs
TN	Achalarus lyciades	IL	PM		Achalarus lyciades	Achalarus lyciades	Species name and concept is consistent across all programs where it occurs
Cas	Achalarus lyciades	IL	Z		Absent	There is no match in this list (species assumed absent)	Species does not occur at IL
IL	Agraulis vanillae	TN	PM		Agraulis vanillae	Agraulis vanillae	Species name and concept is consistent across all programs where it occurs
IA	Agraulis vanillae	TN	PM		Agraulis vanillae	Agraulis vanillae	Species name and concept is consistent across all programs where it occurs
MI	Agraulis vanillae	TN	Z		Absent	There is no match in this list (species assumed absent)	Species does not occur at MI
OH	Agraulis vanillae	TN	PM		Agraulis vanillae	Agraulis vanillae	Species name and concept is consistent across all programs where it occurs
Cas	Agraulis vanillae	TN	Z		Absent	There is no match in this list (species assumed absent)	Species does not occur at TN
CO	Agraulis vanillae	TN	PM		Agraulis vanillae	Agraulis vanillae	Species name and concept is consistent across all programs where it occurs
IA	Eurema nicippe	IL	PM		Eurema nicippe	Eurema nicippe
TN	Abaeis nicippe	IL	EM		Eurema nicippe	Eurema nicippe
IL	Eurema nicippe	Cas	Z		Absent	There is no match in this list (species assumed absent)
IA	Eurema nicippe	TN	EM		Abaeis nicippe	Abaeis nicippe
IL	Eurema nicippe	TN	EM		Abaeis nicippe	Abaeis nicippe
TN	Abaeis nicippe	Cas	Z		Absent	There is no match in this list (species assumed absent)
CO	Plebejus glandon	Cas	EM		Agriades glandon	Agriades glandon
Cas	Agriades glandon	CO	EM		Plebejus glandon	Plebejus glandon
Cas	Agriades glandon	MPG	Z		Absent	There is no match in this list (species assumed absent)
CO	Plebejus glandon	MPG	Z		Absent	There is no match in this list (species assumed absent)
CO	Plebejus glandon	IL	Z		Absent	There is no match in this list (species assumed absent)
Cas	Agriades glandon	IL	Z		Absent	There is no match in this list (species assumed absent)
IL	Everes comyntas	IA	PM		Everes comyntas	Everes comyntas
MI	Everes comyntas	IA	PM		Everes comyntas	Everes comyntas
OH	Everes comyntas	IA	PM		Everes comyntas	Everes comyntas
TN	Cupido comyntas	IA	EM		Everes comyntas	Everes comyntas
Cas	Cupido comyntas	IA	EM		Everes comyntas	Everes comyntas
IA	Everes comyntas	TN	EM		Cupido comyntas	Cupido comyntas
IA	Everes comyntas	Cas	EM		Cupido comyntas	Cupido comyntas
IL	Eurema lisa	TN	PM		Pyrisitia lisa	Pyrisitia lisa
IL	Eurema lisa	IA	EM		Eurema lisa	Eurema lisa
CO	Pyrisitia lisa	MI	EM		Eurema lisa	Eurema lisa
FL	Pyrisitia lisa	Cas	Z		Absent	There is no match in this list (species assumed absent)
IL	Hemiargus isola	IA	EM		Echinargus isola	Echinargus isola
MI	Hemiargus isola	IL	PM		Hemiargus isola	Hemiargus isola
TN	Echinargus isola	FL	Z		Absent	There is no match in this list (species assumed absent)
CO	Echinargus isola	TN	PM		Echinargus isola	There is no match in this list (species assumed absent)
Cas	Aglais milberti	IL	EM		Nymphalis milbertii	Nymphalis milbertii
IA	Aglais milberti	IL	EM		Nymphalis milbertii	Nymphalis milbertii
MI	Nymphalis milberti	IL	EM		Nymphalis milbertii	Nymphalis milbertii
IL	Nymphalis milbertii	Cas	EM		Aglais milberti	Aglais milberti
IL	Nymphalis milbertii	IA	EM		Aglais milberti	Aglais milberti
IL	Nymphalis milbertii	MI	EM		Nymphalis milberti	Nymphalis milberti
IA	Aglais milberti	Cas	PM		Aglais milberti	Aglais milberti
MPG	Aglais milberti	Cas	PM		Aglais milberti	Aglais milberti
CO	Aglais milberti	Cas	PM		Aglais milberti	Aglais milberti
IL	Plebejus melissa	IA	sub	N	Lycaeides melissa	Lycaeides melissa User beware: subspecies may not match. If this concerns you, you should assess compatibility
IL	Plebejus melissa	MI	EM-s	N	Lycaeides melissa samuelis	Lycaeides melissa samuelis
IL	Plebejus melissa	Ohio	EM-s	N	Lycaeides melissa samuelis	Lycaeides melissa samuelis
IL	Plebejus melissa	TN	Z	N	Absent	There is no match in this list (species assumed absent)
IL	Plebejus melissa	FL	Z	N	Absent	There is no match in this list (species assumed absent)
IL	Plebejus melissa	Cas	PM-s	Y	Plebejus melissa	Plebejus melissa IL, MI and OH monitor subspecies samuelis. When comparing data between these programs and Cas or MPG (Pelham-based) beware that Pelham taxonomic perspective interprets samuelis as a distinct species from P. melissa. User should assess compatibility.
IL	Plebejus melissa	MPG	PM-s	N	Plebejus melissa	Plebejus melissa IL, MI and OH monitor subspecies samuelis. When comparing data between these programs and Cas or MPG (Pelham-based) beware that Pelham taxonomic perspective interprets samuelis as a distinct species from P. melissa. User should assess compatibility.
IL	Plebejus melissa	CO	sub	N	Plebejus melissa	Plebejus melissa User beware: subspecies may not match. If this concerns you, you should assess compatibility
IL	Plebejus melissa	OC	Z	N	Absent	There is no match in this list (species assumed absent)
IA	Lycaeides melissa	IL	sub	N	Plebejus melissa	Plebejus melissa User beware: subspecies may not match. If this concerns you, you should assess compatibility
IA	Lycaeides melissa	MI	sub	N	Lycaeides melissa samuelis	Lycaeides melissa samuelis User beware: subspecies may not match. If this concerns you, you should assess compatibility
IA	Lycaeides melissa	OH	sub	N	Lycaeides melissa samuelis	Lycaeides melissa samuelis User beware: subspecies may not match. If this concerns you, you should assess compatibility
IA	Lycaeides melissa	Cas	EM	N	Plebejus melissa	Plebejus melissa
MI	Lycaeides melissa samuelis	IL	EM	Y	Plebejus melissa	Plebejus melissa
MI	Lycaeides melissa samuelis	IA	sub	Y	Lycaeides melissa	Lycaeides melissa User beware: subspecies may not match. If this concerns you, you should assess compatibility
MI	Lycaeides melissa samuelis	OH	PM	Y	Lycaeides melissa samuelis	Lycaeides melissa samuelis
MI	Lycaeides melissa samuelis	TN	Z	N	Absent	There is no match in this list (species assumed absent)
MI	Lycaeides melissa samuelis	FL	Z	N	Absent	There is no match in this list (species assumed absent)
MI	Lycaeides melissa samuelis	Cas	EM-s	Y	Plebejus melissa	Plebejus melissa IL, MI and OH monitor subspecies samuelis. When comparing data between these programs and Cas or MPG (Pelham-based) beware that Pelham taxonomic perspective interprets samuelis as a distinct species from P. melissa. User should assess compatibility.
MI	Lycaeides melissa samuelis	MPG	EM-s	Y	Plebejus melissa	Plebejus melissa IL, MI and OH monitor subspecies samuelis. When comparing data between these programs and Cas or MPG (Pelham-based) beware that Pelham taxonomic perspective interprets samuelis as a distinct species from P. melissa. User should assess compatibility.
MI	Lycaeides melissa samuelis	CO	sub	Y	Plebejus melissa	Plebejus melissa User beware: subspecies may not match. If this concerns you, you should assess compatibility
OH	Lycaeides melissa samuelis	IL	EM	Y	Plebejus melissa	Plebejus melissa
OH	Lycaeides melissa samuelis	IA	sub	Y	Lycaeides melissa	Lycaeides melissa User beware: subspecies may not match. If this concerns you, you should assess compatibility
OH	Lycaeides melissa samuelis	MI	PM	N	Lycaeides melissa samuelis	Lycaeides melissa samuelis
OH	Lycaeides melissa samuelis	Cas	EM-s	Y	Plebejus melissa	Plebejus melissa IL, MI and OH monitor subspecies samuelis. When comparing data between these programs and Cas or MPG (Pelham-based) beware that Pelham taxonomic perspective interprets samuelis as a distinct species from P. melissa. User should assess compatibility.
OH	Lycaeides melissa samuelis	MPG	EM-s	Y	Plebejus melissa	Plebejus melissa IL, MI and OH monitor subspecies samuelis. When comparing data between these programs and Cas or MPG (Pelham-based) beware that Pelham taxonomic perspective interprets samuelis as a distinct species from P. melissa. User should assess compatibility.
OH	Lycaeides melissa samuelis	CO	sub	Y	Plebejus melissa	Plebejus melissa User beware: subspecies may not match. If this concerns you, you should assess compatibility
Cas	Plebejus melissa	IL	PM/inc	Y	Lycaeides melissa samuelis	Lycaeides melissa samuelis User beware: Assess taxonomic assuptions before combining data. Cas and MPG (Pelham-based) interpret eastern-ranging L. samuelis (occuring at IL, MI and OH) a distinct species from western-ranging L. melissa.
Cas	Plebejus melissa	IA	EM	N	Lycaeides melissa	Lycaeides melissa
Cas	Plebejus melissa	MI	Z	Y	Absent	Lycaeides melissa samuelis User beware: Assess taxonomic assuptions before combining data. Cas and MPG (Pelham-based) interpret eastern-ranging L. samuelis (occuring at IL, MI and OH) a distinct species from western-ranging L. melissa.	To make reciprocal searches equivalent (as required by tool) and allow us to flag this problem for the user, we return a donor response with commentary, rather than absent.
Cas	Plebejus melissa	OH	Z	Y	Absent	Lycaeides melissa samuelis User beware: Assess taxonomic assuptions before combining data. Cas and MPG (Pelham-based) interpret eastern-ranging L. samuelis (occuring at IL, MI and OH) a distinct species from western-ranging L. melissa.	To make reciprocal searches equivalent (as required by tool) and allow us to flag this problem for the user, we return a donor response with commentary, rather than absent.
Cas	Plebejus melissa	TN	Z	N	Absent	There is no match in this list (species assumed absent)
Cas	Plebejus melissa	FL	Z	N	Absent	There is no match in this list (species assumed absent)
Cas	Plebejus melissa	MPG	PM	N	Plebejus melissa	Plebejus melissa
Cas	Plebejus melissa	CO	PM	N	Plebejus melissa	Plebejus melissa
Cas	Plebejus melissa	OC	Z	N	Absent	There is no match in this list (species assumed absent)
MPG	Plebejus melissa	IL	PM/inc	Y	Lycaeides melissa samuelis	Lycaeides melissa samuelis User beware: Assess taxonomic assuptions before combining data. Cas and MPG (Pelham-based) interpret eastern-ranging L. samuelis (occuring at IL, MI and OH) a distinct species from western-ranging L. melissa.
MPG	Plebejus melissa	IA	EM	N	Lycaeides melissa	Lycaeides melissa
MPG	Plebejus melissa	MI	Z	Y	Absent	Lycaeides melissa samuelis User beware: Assess taxonomic assuptions before combining data. Cas and MPG (Pelham-based) interpret eastern-ranging L. samuelis (occuring at IL, MI and OH) a distinct species from western-ranging L. melissa.	To make reciprocal searches equivalent (as required by tool) and allow us to flag this problem for the user, we return a donor response with commentary, rather than absent.
MPG	Plebejus melissa	OH	Z	Y	Absent	Lycaeides melissa samuelis User beware: Assess taxonomic assuptions before combining data. Cas and MPG (Pelham-based) interpret eastern-ranging L. samuelis (occuring at IL, MI and OH) a distinct species from western-ranging L. melissa.	To make reciprocal searches equivalent (as required by tool) and allow us to flag this problem for the user, we return a donor response with commentary, rather than absent.
MPG	Plebejus melissa	TN	Z	N	Absent	There is no match in this list (species assumed absent)
MPG	Plebejus melissa	FL	Z	N	Absent	There is no match in this list (species assumed absent)
MPG	Plebejus melissa	Cas	PM	N	Plebejus melissa	Plebejus melissa
MPG	Plebejus melissa	CO	PM	N	Plebejus melissa	Plebejus melissa
MPG	Plebejus melissa	OC	Z	N	Absent	There is no match in this list (species assumed absent)
CO	Plebejus melissa	IL	sub	Y	Plebejus melissa	Plebejus melissa User beware: subspecies may not match. If this concerns you, you should assess compatibility
CO	Plebejus melissa	IA	EM	N	Lycaeides melissa	Lycaeides melissa
CO	Plebejus melissa	MI	sub	Y	Lycaeides melissa samuelis	Lycaeides melissa samuelis User beware: subspecies may not match. If this concerns you, you should assess compatibility
CO	Plebejus melissa	OH	sub	Y	Lycaeides melissa samuelis	Lycaeides melissa samuelis User beware: subspecies may not match. If this concerns you, you should assess compatibility
CO	Plebejus melissa	TN	Z	N	Absent	There is no match in this list (species assumed absent)
CO	Plebejus melissa	FL	Z	N	Absent	There is no match in this list (species assumed absent)
CO	Plebejus melissa	Cas	PM	N	Plebejus melissa	Plebejus melissa
CO	Plebejus melissa	MPG	PM	N	Plebejus melissa	Plebejus melissa
CO	Plebejus melissa	OC	Z	N	Absent	There is no match in this list (species assumed absent)
IL	Satyrium favonius	IA	Z	N	Absent	There is no match in this list (species assumed absent)
IL	Satyrium favonius	MI	EM-s	Y	Satyrium favonius ontario	Satyrium favonius ontario There is no exact match in this list. Proceed with caution. Taxonomic granularity between programs does not match. User should assess compatibility.
IL	Satyrium favonius	OH	EM	N	Fixsenia favonius	Fixsenia favonius
IL	Satyrium favonius	TN	MM	Y	M	Satyrium favonius ontario Satyrium favonius There is no exact match in this list. Proceed with caution. Taxonomic granularity between programs does not match. User should assess compatibility.
IL	Satyrium favonius	FL	PM	N	Satyrium favonius	Satyrium favonius
MI	Satyrium favonius ontario	IL	EM-s	Y	Satyrium favonius	Satyrium favonius There is no exact match in this list. Proceed with caution. Taxonomic granularity between programs does not match. User should assess compatibility.
MI	Satyrium favonius ontario	OH	EM-g + EM-s	Y	Fixsenia favonius	Fixsenia favonius There is no exact match in this list. Proceed with caution. Taxonomic granularity between programs does not match. User should assess compatibility.
MI	Satyrium favonius ontario	TN	MM	Y	S. favonius, S. favonius ontario	Satyrium favonius ontario Satyrium favonius There is no exact match in this list. Proceed with caution. Taxonomic granularity between programs does not match. User should assess compatibility.
MI	Satyrium favonius ontario	FL	EM-s	Y	Satyrium favonius	Satyrium favonius There is no exact match in this list. Proceed with caution. Taxonomic granularity between programs does not match. User should assess compatibility.
OH	Fixsenia favonius	IL	EM	N	Satyrium favonius	Satyrium favonius
OH	Fixsenia favonius	MI	EM-g +EM-s	Y	Satyrium favonius ontario	Satyrium favonius ontario There is no exact match in this list. Proceed with caution. Taxonomic granularity between programs does not match. User should assess compatibility.
OH	Fixsenia favonius	TN	MM + EM-g	Y	S. favonius, S. favonius ontario	Satyrium favonius ontario Satyrium favonius There is no exact match in this list. Proceed with caution. Taxonomic granularity between programs does not match. User should assess compatibility.
OH	Fixsenia favonius	FL	EM		Satyrium favonius	Satyrium favonius
TN	Satyrium favonius	IL	COM	Y	Satyrium favonius	Satyrium favonius There is no exact match in this list. Proceed with caution. Taxonomic granularity between programs does not match. User should assess compatibility.
TN	Satyrium favonius	MI	COM	Y	Satyrium favonius ontario	Satyrium favonius ontario There is no exact match in this list. Proceed with caution. Taxonomic granularity between programs does not match. User should assess compatibility.
TN	Satyrium favonius	OH	COM +EM-g	Y	Fixsenia favonius	Fixsenia favonius There is no exact match in this list. Proceed with caution. Taxonomic granularity between programs does not match. User should assess compatibility.
TN	Satyrium favonius	FL	COM	Y	Satyrium favonius	Satyrium favonius There is no exact match in this list. Proceed with caution. Taxonomic granularity between programs does not match. User should assess compatibility.
TN	Satyrium favonius ontario	IL	COM	Y	Satyrium favonius	Satyrium favonius There is no exact match in this list. Proceed with caution. Taxonomic granularity between programs does not match. User should assess compatibility.
TN	Satyrium favonius ontario	MI	COM	Y	Satyrium favonius ontario	Satyrium favonius ontario There is no exact match in this list. Proceed with caution. The projects do not agree on the subspecies in this taxon. User should assess compatibility.
TN	Satyrium favonius ontario	OH	COM +EM-g	Y	Fixsenia favonius	Fixsenia favonius There is no exact match in this list. Proceed with caution. Taxonomic granularity between programs does not match. User should assess compatibility.
TN	Satyrium favonius ontario	FL	COM	Y	Satyrium favonius	Satyrium favonius There is no exact match in this list. Proceed with caution. Taxonomic granularity between programs does not match. User should assess compatibility.
When combining, be aware that TN is collecting data at both the species and subspecies level. User should assess compatibility	Copaeodes minimus	FL	EM	N	Copaeodes minima	Copaeodes minima
FL	Copaeodes minima	OH	EM	N	Copaeodes minimus	Copaeodes minimus
IL	Euphyes conspicua	OH	EM	N	Euphyes conspicuus	Euphyes conspicuus
IA	Euphyes conspicua	MI	PM	N	Euphyes conspicua	Euphyes conspicua
OH	Euphyes conspicuus	TN	Z	N	Absent	There is no match in this list (species assumed absent)
IL	Nymphalis vaualbum	MI	PM	N	Nymphalis vaualbum	Nymphalis vaualbum
IO	Nymphalis vaualbum	OH	EM	N	Nymphalis vau-album	Nymphalis vau-album
OH	Nymphalis vau-album	Cas	EM	N	Nymphalis l-album	Nymphalis l-album
Cas	Nymphalis l-album	MPG	Z	N	Absent	There is no match in this list (species assumed absent)
IL	Nymphalis vaualbum	IA	PM	N	Nympahlis vaualbum	Nymphalis vaualbum
IL	Nymphalis vaualbum	OH	EM	N	Nymphalis vau-album	Nymphalis vau-album
IL	Nymphalis vaualbum	Cas	EM	N	Nymphalis l-album	Nymphalis l-album
MPG	Papilio multicaudatus	Cas	EM	N	Papilio multicaudata	Papilio multicaudata
CO	Papilio multicaudata	Cas	PM	N	Papilio multicaudata	Papilio multicaudata
CO	Papilio multicaudata	OC	Z	N	Absent	There is no match in this list (species assumed absent)
IA	Satyrium acadica	MI	PM	N	Satyrium acadica	Satyrium acadica
OH	Satyrium acadicum	IL	EM	N	Satyrium acadica	Satyrium acadica
CO	Satyrium acadica	Cas	Z	N	Absent	There is no match in this list (species assumed absent)
IL	Satyrium caryaevorum	IA	PM	N	Satyrium caryaevorum	Satyrium caryaevorum
IL	Satyrium caryaevorum	MI	PM	N	Satyrium caryaevorum	Satyrium caryaevorum
IL	Satyrium caryaevorum	OH	PM	N	Satyrium caryaevorum	Satyrium caryaevorum
IL	Satyrium caryaevorum	TN	EM	N	Satyrium caryaevorus	Satyrium caryaevorus
IA	Satyrium caryaevorum	IL	PM	N	Satyrium caryaevorum	Satyrium caryaevorum
IA	Satyrium caryaevorum	MI	PM	N	Satyrium caryaevorum	Satyrium caryaevorum
IA	Satyrium caryaevorum	OH	PM	N	Satyrium caryaevorum	Satyrium caryaevorum
IA	Satyrium caryaevorum	TN	EM	N	Satyrium caryaevorus	Satyrium caryaevorus
MI	Satyrium caryaevorum	IL	PM	N	Satyrium caryaevorum	Satyrium caryaevorum
MI	Satyrium caryaevorum	IA	PM	N	Satyrium caryaevorum	Satyrium caryaevorum
MI	Satyrium caryaevorum	OH	PM	N	Satyrium caryaevorum	Satyrium caryaevorum
MI	Satyrium caryaevorum	TN	EM	N	Satyrium caryaevorus	Satyrium caryaevorus
OH	Satyrium caryaevorum	IL	PM	N	Satyrium caryaevorum	Satyrium caryaevorum
OH	Satyrium caryaevorum	IA	PM	N	Satyrium caryaevorum	Satyrium caryaevorum
OH	Satyrium caryaevorum	MI	PM	N	Satyrium caryaevorum	Satyrium caryaevorum
OH	Satyrium caryaevorum	TN	EM	N	Satyrium caryaevorus	Satyrium caryaevorus
TN	Satyrium caryaevorus	IL	EM	N	Satyrium caryaevorum	Satyrium caryaevorum
TN	Satyrium caryaevorus	IL	EM	N	Satyrium caryaevorum	Satyrium caryaevorum
TN	Satyrium caryaevorus	MI	EM	N	Satyrium caryaevorum	Satyrium caryaevorum
TN	Satyrium caryaevorus	OH	EM	N	Satyrium caryaevorum	Satyrium caryaevorum
MI	Phyciodes selenis/cocyta	OH	EM	Y	Phyciodes selenis	Phyciodes selenis There is no exact match in this list. Proceed with caution. Exercise caution when considering subspecies.
MI	Phyciodes selenis/cocyta	Cas	EM	Y	Phyciodes cocyta	Phyciodes cocyta There is no exact match in this list. Proceed with caution. Exercise caution when considering subspecies.
MI	Phyciodes selenis/cocyta	MPG	EM-s	Y	Phyciodes cocyta selenis	Phyciodes cocyta selenis There is no exact match in this list. Proceed with caution. Exercise caution when considering subspecies.
MI	Phyciodes selenis/cocyta	CO	EM	Y	Phyciodes cocyta	Phyciodes cocyta There is no exact match in this list. Proceed with caution. Exercise caution when considering subspecies.
OH	Phyciodes selenis	MI	EM	Y	Phyciodes selenis/cocyta	Phyciodes selenis/cocyta There is no exact match in this list. Proceed with caution. Exercise caution when considering subspecies.
OH	Phyciodes selenis	Cas	EM	Y	Phyciodes cocyta	Phyciodes cocyta There is no exact match in this list. Proceed with caution. Exercise caution when considering subspecies.
OH	Phyciodes selenis	MPG	EM-s	Y	Phyciodes cocyta selenis	Phyciodes cocyta selenis There is no exact match in this list. Proceed with caution. Exercise caution when considering subspecies.
OH	Phyciodes selenis	CO	EM	Y	Phyciodes cocyta	Phyciodes cocyta There is no exact match in this list. Proceed with caution. Exercise caution when considering subspecies.
Cas	Phyciodes cocyta	MI	EM	Y	Phyciodes selenis/cocyta	Phyciodes selenis/cocyta There is no exact match in this list. Proceed with caution. Exercise caution when considering subspecies.
Cas	Phyciodes cocyta	OH	EM	Y	Phyciodes selenis	Phyciodes selenis There is no exact match in this list. Proceed with caution. Exercise caution when considering subspecies.
Cas	Phyciodes cocyta	MPG	EM-s	Y	Phyciodes cocyta selenis	Phyciodes cocyta selenis There is no exact match in this list. Proceed with caution. Exercise caution when considering subspecies.
Cas	Phyciodes cocyta	CO	PM	N	Phyciodes cocyta	Phyciodes cocyta
MPG	Phyciodes cocyta selenis	MI	EM	Y	Phyciodes selenis/cocyta	Phyciodes selenis/cocyta
MPG	Phyciodes cocyta selenis	OH	EM-s	Y	Phyciodes selenis	Phyciodes selenis
MPG	Phyciodes cocyta selenis	Cas	EM-s	Y	Phyciodes cocyta	Phyciodes cocyta
MPG	Phyciodes cocyta selenis	CO	EM-s	Y	Phyciodes cocyta	Phyciodes cocyta
CO	Phyciodes cocyta	MI	EM	Y	Phyciodes selenis/cocyta	Phyciodes selenis/cocyta There is no exact match in this list. Proceed with caution. Exercise caution when considering subspecies.
CO	Phyciodes cocyta	OH	EM	Y	Phyciodes selenis	Phyciodes selenis There is no exact match in this list. Proceed with caution. Exercise caution when considering subspecies.
CO	Phyciodes cocyta	Cas	PM	N	Phyciodes cocyta	Phyciodes cocyta
CO	Phyciodes cocyta	MPG	EM-s	Y	Phyciodes cocyta selenis	Phyciodes cocyta selenis There is no exact match in this list. Proceed with caution. Exercise caution when considering subspecies.
MI	Phyciodes selenis/cocyta	Illinois	Z	N	absent	There is no match in this list (species assumed absent)
OH	Phyciodes selenis	IA	Z	N	absent	There is no match in this list (species assumed absent)
Cascades	Phyciodes cocyta	Tennessee	Z	N	absent	There is no match in this list (species assumed absent)
MPG	Phyciodes cocyta selenis	Florida	Z	N	absent	There is no match in this list (species assumed absent)
CO	Phyciodes cocyta	Orange	Z	N	absent	There is no match in this list (species assumed absent)
Cas	Cercyonis sthenele	CO	PM	N	Cercyonis sthenele	Cercyonis sthenele
Colorado	Cercyonis sthenele	Cascades	PM		Cercyonis sthenele	Cercyonis sthenele
Cas	Cercyonis sthenele	OC	EM-s	N	Cercyonis sthenele silvestris	Cercyonis sthenele silvestris The projects report this taxon with different taxonomic granularity. May not be compatible. User should assess.
Orange	Cercyonis sthenele silvestris	Cas	EM-s	Y	Cercyonis sthenele	Cercyonis sthenele The projects report this taxon with different taxonomic granularity. May not be compatible. User should assess.
Orange	Cercyonis sthenele silvestris	CO	EM-s	Y	Cercyonis sthenele	Cercyonis sthenele The projects report this taxon with different taxonomic granularity. May not be compatible. User should assess.
IA	Coenonympha tullia	IL	Z	N	Absent	There is no match in this list (species assumed absent)
IA	Coenonympha tullia	MI	PM	N	Coenonympha tullia	Coenonympha tullia
IA	Coenonympha tullia	OC	EM-s	N	Coenonympha tullia california	Coenonympha tullia california
Orange	Coenonympha tullia california	CO	EM-s	Y	Coenonympha tullia	Coenonympha tullia There is no exact match in this list. Proceed with caution. Programs differ in taxonomic granularity. User should ensure compatibility.
Orange	Coenonympha tullia california	IA	EM-s	Y	Coenonympha tullia	Coenonympha tullia There is no exact match in this list. Proceed with caution. Programs differ in taxonomic granularity. User should ensure compatibility.
Orange	Coenonympha tullia california	Michigan	EM-s	Y	Coenonympha tullia	Coenonympha tullia There is no exact match in this list. Proceed with caution. Programs differ in taxonomic granularity. User should ensure compatibility.
Orange	Coenonympha tullia california	MPG	EM-s	Y	Coenonympha tullia	Coenonympha tullia There is no exact match in this list. Proceed with caution. Programs differ in taxonomic granularity. User should ensure compatibility.
Orange	Coenonympha tullia california	Cascades	EM-s	Y	Coenonympha tullia	Coenonympha tullia There is no exact match in this list. Proceed with caution. Programs differ in taxonomic granularity. User should ensure compatibility.
Orange	Coenonympha tullia california	Ohio	EM-s	Y	Coenonympha tullia	Coenonympha tullia There is no exact match in this list. Proceed with caution. Programs differ in taxonomic granularity. User should ensure compatibility.
IL	Euphyes vestris	IA	PM	N	Euphyes vestris	Euphyes vestris
IA	Euphyes vestris	MI	PM	N	Euphyes vestris	Euphyes vestris
MI	Euphyes vestris	OH	PM	N	Euphyes vestris	Euphyes vestris
OH	Euphyes vestris	TN	PM	N	Euphyes vestris	Euphyes vestris
TN	Euphyes vestris	FL	PM	N	Euphyes vestris	Euphyes vestris
FL	Euphyes vestris	Cas	PM	N	Euphyes vestris	Euphyes vestris
Cas	Euphyes vestris	CO	PM	N	Euphyes vestris	Euphyes vestris
Cas	Euphyes vestris	MPG	Z	N	Absent	There is no match in this list (species assumed absent)
CO	Euphyes vestris	IA	PM	N	Euphyes vestris	Euphyes vestris
CO	Euphyes vestris	OC	EM-s	N	Euphyes vestris harbisoni	Euphyes vestris harbisoni
Orange	Euphyes vestris harbisoni	IL	EM-s	Y	Euphyes vestris	Euphyes vestris There is no exact match in this list. Proceed with caution. Programs differ in taxonomic granularity. User should ensure compatibility.
Orange	Euphyes vestris harbisoni	IA	EM-s	Y	Euphyes vestris	Euphyes vestris There is no exact match in this list. Proceed with caution. Programs differ in taxonomic granularity. User should ensure compatibility.
Orange	Euphyes vestris harbisoni	MI	EM-s	Y	Euphyes vestris	Euphyes vestris There is no exact match in this list. Proceed with caution. Programs differ in taxonomic granularity. User should ensure compatibility.
Orange	Euphyes vestris harbisoni	OH	EM-s	Y	Euphyes vestris	Euphyes vestris There is no exact match in this list. Proceed with caution. Programs differ in taxonomic granularity. User should ensure compatibility.
Orange	Euphyes vestris harbisoni	TN	EM-s	Y	Euphyes vestris	Euphyes vestris There is no exact match in this list. Proceed with caution. Programs differ in taxonomic granularity. User should ensure compatibility.
Orange	Euphyes vestris harbisoni	FL	EM-s	Y	Euphyes vestris	Euphyes vestris There is no exact match in this list. Proceed with caution. Programs differ in taxonomic granularity. User should ensure compatibility.
Orange	Euphyes vestris harbisoni	Cas	EM-s	Y	Euphyes vestris	Euphyes vestris There is no exact match in this list. Proceed with caution. Programs differ in taxonomic granularity. User should ensure compatibility.
Orange	Euphyes vestris harbisoni	MPG	Z	N	Absent	There is no match in this list (species assumed absent)
Orange	Euphyes vestris harbisoni	CO	EM-s	Y	Euphyes vestris	Euphyes vestris There is no exact match in this list. Proceed with caution. Programs differ in taxonomic granularity. User should ensure compatibility.
Cas	Speyeria callippe	MPG	PM	N	Speyeria callippe	Speyeria callippe
Cas	Speyeria callippe	FL	Z	N	Absent	There is no match in this list (species assumed absent)
Cas	Speyeria callippe	CO	PM	N	Speyeria callippe	Speyeria callippe
Cas	Speyeria callippe	OC	EM-s	Y	Speyeria callippe comstocki	Speyeria callippe comstocki
MPG	Speyeria callippe	Cas	PM	N	Speyeria callippe	Speyeria callippe
MPG	Speyeria callippe	CO	PM	N	Speyeria callippe	Speyeria callippe
MPG	Speyeria callippe	OC	EM-s	N	Speyeria callippe comstocki	Speyeria callippe
CO	Speyeria callippe	MPG	PM	N	Speyeria callippe	Speyeria callippe
CO	Speyeria callippe	OC	EM-s	N	Speyeria callippe comstocki	Speyeria callippe
CO	Speyeria callippe	Cas	PM	N	Speyeria callippe	Speyeria callippe
Orange	Speyeria callippe comstocki	MPG	EM-s	Y	Speyeria callippe	Speyeria callippe There is no exact match in this list. Proceed with caution. Programs differ in taxonomic granularity. User should ensure compatibility.
Orange	Speyeria callippe comstocki	Cas	EM-s	Y	Speyeria callippe	Speyeria callippe There is no exact match in this list. Proceed with caution. Programs differ in taxonomic granularity. User should ensure compatibility.
Orange	Speyeria callippe comstocki	CO	EM-s	Y	Speyeria callippe	Speyeria callippe There is no exact match in this list. Proceed with caution. Programs differ in taxonomic granularity. User should ensure compatibility.
IL	Speyeria cybele	OC	Z	N	Absent	There is no match in this list (species assumed absent)
IL	Speyeria cybele	MPG	EM-s	N	Speyeria cybele leto	Speyeria cybele leto
IL	Speyeria cybele	IA	PM	N	Speyeria cybele	Speyeria cybele
IA	Speyeria cybele	MI	PM	N	Speyeria cybele	Speyeria cybele
MI	Speyeria cybele	OH	PM	N	Speyeria cybele	Speyeria cybele
OH	Speyeria cybele	TN	PM	N	Speyeria cybele	Speyeria cybele
TN	Speyeria cybele	FL	PM	N	Speyeria cybele	Speyeria cybele
FL	Speyeria cybele	Cas	PM	N	Speyeria cybele	Speyeria cybele
Cas	Speyeria cybele	CO	PM	N	Speyeria cybele	Speyeria cybele
CO	Speyeria cybele	OC	Z	N	Absent	There is no match in this list (species assumed absent)
CO	Speyeria cybele	MPG	EM-s	N	Speyeria cybele leto	Speyeria cybele leto
MPG	Speyeria cybele leto	IL	EM-s	Y	Speyeria cybele	Speyeria cybele There is no exact match in this list. Proceed with caution. Programs differ in taxonomic granularity. User should ensure compatibility.
MPG	Speyeria cybele leto	IA	EM-s	Y	Speyeria cybele	Speyeria cybele There is no exact match in this list. Proceed with caution. Programs differ in taxonomic granularity. User should ensure compatibility.
MPG	Speyeria cybele leto	MI	EM-s	Y	Speyeria cybele	Speyeria cybele There is no exact match in this list. Proceed with caution. Programs differ in taxonomic granularity. User should ensure compatibility.
MPG	Speyeria cybele leto	OH	EM-s	Y	Speyeria cybele	Speyeria cybele There is no exact match in this list. Proceed with caution. Programs differ in taxonomic granularity. User should ensure compatibility.
MPG	Speyeria cybele leto	TN	EM-s	Y	Speyeria cybele	Speyeria cybele There is no exact match in this list. Proceed with caution. Programs differ in taxonomic granularity. User should ensure compatibility.
MPG	Speyeria cybele leto	FL	EM-s	Y	Speyeria cybele	Speyeria cybele There is no exact match in this list. Proceed with caution. Programs differ in taxonomic granularity. User should ensure compatibility.
MPG	Speyeria cybele leto	Cas	EM-s	Y	Speyeria cybele	Speyeria cybele There is no exact match in this list. Proceed with caution. Programs differ in taxonomic granularity. User should ensure compatibility.
MPG	Speyeria cybele leto	CO	EM-s	Y	Speyeria cybele	Speyeria cybele There is no exact match in this list. Proceed with caution. Programs differ in taxonomic granularity. User should ensure compatibility.
MPG	Speyeria cybele leto	OC	Z	N	Absent	There is no match in this list (species assumed absent)
Cas	Hesperia colorado	TN	Z	N	Absent	There is no match in this list (species assumed absent)
Cas	Hesperia colorado	CO	PM	N	Hesperia colorado	Hesperia colorado
Cas	Hesperia colorado	MPG	EM-s	N	Hesperia colorado idaho	Hesperia colorado idaho
Cas	Hesperia colorado	OC	PM	N	Hesperia colorado	Hesperia colorado
CO	Hesperia colorado	Cas	PM	N	Hesperia colorado	Hesperia colorado
CO	Hesperia colorado	MPG	EM-s	N	Hesperia colorado idaho	Hesperia colorado idaho
CO	Hesperia colorado	OC	PM	N	Hesperia colorado	Hesperia colorado
Orange	Hesperia colorado	Cas	PM	N	Hesperia colorado	Hesperia colorado
Orange	Hesperia colorado	MPG	EM-s	N	Hesperia colorado idaho	Hesperia colorado idaho
Orange	Hesperia colorado	CO	PM	N	Hesperia colorado	Hesperia colorado
MPG	Hesperia colorado idaho	Cas	EM-s	Y	Hesperia colorado	Hesperia colorado There is no exact match in this list. Proceed with caution. Programs differ in taxonomic granularity. User should ensure compatibility.
MPG	Hesperia colorado idaho	CO	EM-s	Y	Hesperia colorado	Hesperia colorado There is no exact match in this list. Proceed with caution. Programs differ in taxonomic granularity. User should ensure compatibility.
MPG	Hesperia colorado idaho	OC	EM-s	Y	Hesperia colorado	Hesperia colorado There is no exact match in this list. Proceed with caution. Programs differ in taxonomic granularity. User should ensure compatibility.
IL	Erynnis brizo	IA	PM	N	Erynnis brizo	Erynnis brizo
IL	Erynnis brizo	MI	PM	N	Erynnis brizo	Erynnis brizo
IL	Erynnis brizo	OH	EM	N	Erynnis brizo brizo	Erynnis brizo brizo
IL	Erynnis brizo	TN	PM	N	Erynnis brizo	Erynnis brizo
IL	Erynnis brizo	Cas	PM	N	Erynnis brizo	Erynnis brizo
IL	Erynnis brizo	MPG	PM	N	Erynnis brizo	Erynnis brizo
IL	Erynnis brizo	CO	PM	N	Erynnis brizo	Erynnis brizo
IL	Erynnis brizo	Orange	PM	N	Erynnis brizo	Erynnis brizo
IL	Erynnis brizo	FL	PM	N	Erynnis brizo	Erynnis brizo
IA	Erynnis brizo	MI	PM	N	Erynnis brizo	Erynnis brizo
IA	Erynnis brizo	OH	EM	N	Erynnis brizo brizo	Erynnis brizo brizo
IA	Erynnis brizo	TN	PM	N	Erynnis brizo	Erynnis brizo
IA	Erynnis brizo	Cas	PM	N	Erynnis brizo	Erynnis brizo
IA	Erynnis brizo	MPG	PM	N	Erynnis brizo	Erynnis brizo
IA	Erynnis brizo	CO	PM	N	Erynnis brizo	Erynnis brizo
IA	Erynnis brizo	Orange	PM	N	Erynnis brizo	Erynnis brizo
IA	Erynnis brizo	FL	PM	N	Erynnis brizo	Erynnis brizo
MI	Erynnis brizo	OH	EM	N	Erynnis brizo brizo	Erynnis brizo brizo
MI	Erynnis brizo	TN	PM	N	Erynnis brizo	Erynnis brizo
MI	Erynnis brizo	Cas	PM	N	Erynnis brizo	Erynnis brizo
MI	Erynnis brizo	MPG	PM	N	Erynnis brizo	Erynnis brizo
MI	Erynnis brizo	CO	PM	N	Erynnis brizo	Erynnis brizo
MI	Erynnis brizo	Orange	PM	N	Erynnis brizo	Erynnis brizo
MI	Erynnis brizo	FL	PM	N	Erynnis brizo	Erynnis brizo
OH	Erynnis brizo brizo	TN	PM	N	Erynnis brizo	Erynnis brizo
OH	Erynnis brizo brizo	Cas	PM	N	Erynnis brizo	Erynnis brizo
OH	Erynnis brizo brizo	MPG	PM	N	Erynnis brizo	Erynnis brizo
OH	Erynnis brizo brizo	CO	PM	N	Erynnis brizo	Erynnis brizo
OH	Erynnis brizo brizo	Orange	PM	N	Erynnis brizo	Erynnis brizo
OH	Erynnis brizo brizo	FL	PM	N	Erynnis brizo	Erynnis brizo
TN	Erynnis brizo	OH	EM	N	Erynnis brizo brizo	Erynnis brizo brizo
TN	Erynnis brizo	Cas	PM	N	Erynnis brizo	Erynnis brizo
TN	Erynnis brizo	MPG	PM	N	Erynnis brizo	Erynnis brizo
TN	Erynnis brizo	CO	PM	N	Erynnis brizo	Erynnis brizo
TN	Erynnis brizo	Orange	PM	N	Erynnis brizo	Erynnis brizo
TN	Erynnis brizo	FL	PM	N	Erynnis brizo	Erynnis brizo
Cas	Erynnis brizo	OH	EM	N	Erynnis brizo brizo	Erynnis brizo brizo
Cas	Erynnis brizo	MPG	PM	N	Erynnis brizo	Erynnis brizo
Cas	Erynnis brizo	CO	PM	N	Erynnis brizo	Erynnis brizo
Cas	Erynnis brizo	Orange	PM	N	Erynnis brizo	Erynnis brizo
Cas	Erynnis brizo	FL	PM	N	Erynnis brizo	Erynnis brizo
MPG	Erynnis brizo	OH	EM	N	Erynnis brizo brizo	Erynnis brizo brizo
MPG	Erynnis brizo	CO	PM	N	Erynnis brizo	Erynnis brizo
MPG	Erynnis brizo	Orange	PM	N	Erynnis brizo	Erynnis brizo
MPG	Erynnis brizo	FL	PM	N	Erynnis brizo	Erynnis brizo
Orange	Erynnis brizo	OH	EM	N	Erynnis brizo brizo	Erynnis brizo brizo
Orange	Erynnis brizo	FL	PM	N	Erynnis brizo	Erynnis brizo
Cas	Colias alexandra	MPG	PM	N	Colias alexandra	Colias alexandra
Cas	Colias alexandra	CO	PM	N	Colias alexandra	Colias alexandra
Cas	Colias alexandra	OC	Z	Y	Absent	Colias alexandra harfordii Pelham and O&W both consider Colias harfordii a separate species from C. alexandra. O&W and Irvine Ranch consider harfordii a subspecies (Irvine declares a deviation from O&W base list). User needs to determine whether these should be combined as the same species or not.	To make reciprocal searches equivalent (as required by tool) and allow us to flag this problem for the user, we return a donor response with commentary, rather than absent.
Orange	Colias alexandra harfordii	Cas	EM-S	Y	Colias alexandra	Colias alexandra Pelham and O&W both consider Colias harfordii a separate species from C. alexandra. O&W and Irvine Ranch consider harfordii a subspecies (Irvine declares a deviation from O&W base list). User needs to determine whether these should be combined as the same species or not.
CO	Colias alexandra	OC	Z	Y	Absent	Colias alexandra harfordii Pelham and O&W both consider Colias harfordii a separate species from C. alexandra. O&W and Irvine Ranch consider harfordii a subspecies (Irvine declares a deviation from O&W base list). User needs to determine whether these should be combined as the same species or not.	To make reciprocal searches equivalent (as required by tool) and allow us to flag this problem for the user, we return a donor response with commentary, rather than absent.
Orange	Colias alexandra harfordii	CO	EM-s	Y	Colias alexandra	Colias alexandra Pelham and O&W both consider Colias harfordii a separate species from C. alexandra. O&W and Irvine Ranch consider harfordii a subspecies (Irvine declares a deviation from O&W base list). User needs to determine whether these should be combined as the same species or not.
Orange	Colias alexandra harfordii	MPG	Z	Y	Absent	Colias alexandra Pelham and O&W both consider Colias harfordii a separate species from C. alexandra. O&W and Irvine Ranch consider harfordii a subspecies (Irvine declares a deviation from O&W base list). User needs to determine whether these should be combined as the same species or not.	To make reciprocal searches equivalent (as required by tool) and allow us to flag this problem for the user, we return a donor response with commentary, rather than absent.
MPG	Colias alexandra	OC	EM-S	Y	Colias alexandra harfordii	Colias alexandra harfordii Pelham and O&W both consider Colias harfordii a separate species from C. alexandra. O&W and Irvine Ranch consider harfordii a subspecies (Irvine declares a deviation from O&W base list). User needs to determine whether these should be combined as the same species or not.
IA	Megisto cymela	MI	PM	N	Megisto cymela	Megisto cymela
MI	Megisto cymela	OH	PM	N	Megisto cymela	Megisto cymela
OH	Megisto cymela	TN	PM	N	Megisto cymela	Megisto cymela
TN	Megisto cymela	CO	PM	N	Megisto cymela	Megisto cymela
CO	Megisto cymela	IL	PM	N	Megisto cymela	Megisto cymela
IL	Megisto cymela	FL	MM	Y	Megisto cymela cymela, Megisto cymela viola	Megisto cymela cymela Megisto cymela viola There is no exact match in this list. Proceed with caution. Programs differ in taxonomic granularity. User should ensure compatibility.
IA	Megisto cymela	FL	MM	Y	Megisto cymela cymela, Megisto cymela viola	Megisto cymela cymela Megisto cymela viola There is no exact match in this list. Proceed with caution. Programs differ in taxonomic granularity. User should ensure compatibility.
MI	Megisto cymela	FL	MM	Y	Megisto cymela cymela, Megisto cymela viola	Megisto cymela cymela Megisto cymela viola There is no exact match in this list. Proceed with caution. Programs differ in taxonomic granularity. User should ensure compatibility.
OH	Megisto cymela	FL	MM	Y	Megisto cymela cymela, Megisto cymela viola	Megisto cymela cymela Megisto cymela viola There is no exact match in this list. Proceed with caution. Programs differ in taxonomic granularity. User should ensure compatibility.
TN	Megisto cymela	FL	MM	Y	Megisto cymela cymela, Megisto cymela viola	Megisto cymela cymela Megisto cymela viola There is no exact match in this list. Proceed with caution. Programs differ in taxonomic granularity. User should ensure compatibility.
CO	Megisto cymela	FL	MM	Y	Megisto cymela cymela, Megisto cymela viola	Megisto cymela cymela Megisto cymela viola There is no exact match in this list. Proceed with caution. Programs differ in taxonomic granularity. User should ensure compatibility.
FL	Megisto cymela cymela	IL	COM	Y	Megisto cymela	Megisto cymela There is no exact match in this list. Proceed with caution. Programs differ in taxonomic granularity. User should ensure compatibility.
FL	Megisto cymela cymela	IA	COM	Y	Megisto cymela	Megisto cymela There is no exact match in this list. Proceed with caution. Programs differ in taxonomic granularity. User should ensure compatibility.
FL	Megisto cymela viola	MI	COM	Y	Megisto cymela	Megisto cymela There is no exact match in this list. Proceed with caution. Programs differ in taxonomic granularity. User should ensure compatibility.
FL	Megisto cymela viola	OH	COM	Y	Megisto cymela	Megisto cymela There is no exact match in this list. Proceed with caution. Programs differ in taxonomic granularity. User should ensure compatibility.
FL	Megisto cymela viola	TN	COM	Y	Megisto cymela	Megisto cymela There is no exact match in this list. Proceed with caution. Programs differ in taxonomic granularity. User should ensure compatibility.
FL	Megisto cymela viola	CO	COM	Y	Megisto cymela	Megisto cymela There is no exact match in this list. Proceed with caution. Programs differ in taxonomic granularity. User should ensure compatibility.
FL	Megisto cymela viola	IL	COM	Y	Megisto cymela	Megisto cymela There is no exact match in this list. Proceed with caution. Programs differ in taxonomic granularity. User should ensure compatibility.
IL	Megisto cymela	IA	PM	N	Megisto cymela	Megisto cymela
IL	Megisto cymela	Cas	Z	N	Absent	There is no match in this list (species assumed absent)
IL	Megisto cymela	OC	Z	N	Absent	There is no match in this list (species assumed absent)
IL	Megisto cymela	MPG	Z	N	Absent	There is no match in this list (species assumed absent)
IA	Megisto cymela	MI	PM	N	Megisto cymela	Megisto cymela
MI	Megisto cymela	OH	PM	N	Megisto cymela	Megisto cymela
OH	Megisto cymela	TN	PM	N	Megisto cymela	Megisto cymela
TN	Megisto cymela	CO	PM	N	Megisto cymela	Megisto cymela
CO	Megisto cymela	IL	PM	N	Megisto cymela	Megisto cymela
IL	Megisto cymela	FL	MM	Y	Megisto cymela cymela, Megisto cymela viola	Megisto cymela cymela Megisto cymela viola There is no exact match in this list. Proceed with caution. Programs differ in taxonomic granularity. User should ensure compatibility.
IA	Megisto cymela	FL	MM	Y	Megisto cymela cymela, Megisto cymela viola	Megisto cymela cymela Megisto cymela viola There is no exact match in this list. Proceed with caution. Programs differ in taxonomic granularity. User should ensure compatibility.
MI	Megisto cymela	FL	MM	Y	Megisto cymela cymela, Megisto cymela viola	Megisto cymela cymela Megisto cymela viola There is no exact match in this list. Proceed with caution. Programs differ in taxonomic granularity. User should ensure compatibility.
OH	Megisto cymela	FL	MM	Y	Megisto cymela cymela, Megisto cymela viola	Megisto cymela cymela Megisto cymela viola There is no exact match in this list. Proceed with caution. Programs differ in taxonomic granularity. User should ensure compatibility.
TN	Megisto cymela	FL	MM	Y	Megisto cymela cymela, Megisto cymela viola	Megisto cymela cymela Megisto cymela viola There is no exact match in this list. Proceed with caution. Programs differ in taxonomic granularity. User should ensure compatibility.
CO	Megisto cymela	FL	MM	Y	Megisto cymela cymela, Megisto cymela viola	Megisto cymela cymela Megisto cymela viola There is no exact match in this list. Proceed with caution. Programs differ in taxonomic granularity. User should ensure compatibility.
FL	Megisto cymela cymela	IL	Com	Y	Megisto cymela	Megisto cymela There is no exact match in this list. Proceed with caution. Because one of these projects collects data without distinguishing the two subspecies, data between these programs are NOT compatible UNLESS analyses combine data from both subspecies at both projects.
FL	Megisto cymela cymela	IA	Com	Y	Megisto cymela	Megisto cymela There is no exact match in this list. Proceed with caution. Because one of these projects collects data without distinguishing the two subspecies, data between these programs are NOT compatible UNLESS analyses combine data from both subspecies at both projects.
FL	Megisto cymela cymela	MI	Com	Y	Megisto cymela	Megisto cymela There is no exact match in this list. Proceed with caution. Because one of these projects collects data without distinguishing the two subspecies, data between these programs are NOT compatible UNLESS analyses combine data from both subspecies at both projects.
FL	Megisto cymela viola	OH	Com	Y	Megisto cymela	Megisto cymela There is no exact match in this list. Proceed with caution. Because one of these projects collects data without distinguishing the two subspecies, data between these programs are NOT compatible UNLESS analyses combine data from both subspecies at both projects.
FL	Megisto cymela viola	TN	Com	Y	Megisto cymela	Megisto cymela There is no exact match in this list. Proceed with caution. Because one of these projects collects data without distinguishing the two subspecies, data between these programs are NOT compatible UNLESS analyses combine data from both subspecies at both projects.
FL	Megisto cymela viola	CO	Com	Y	Megisto cymela	Megisto cymela There is no exact match in this list. Proceed with caution. Because one of these projects collects data without distinguishing the two subspecies, data between these programs are NOT compatible UNLESS analyses combine data from both subspecies at both projects.
FL	Megisto cymela viola	IL	Com	Y	Megisto cymela	Megisto cymela There is no exact match in this list. Proceed with caution. Because one of these projects collects data without distinguishing the two subspecies, data between these programs are NOT compatible UNLESS analyses combine data from both subspecies at both projects.
Cas	Plebejus lupini	MPG	PM	N	Plebejus lupini	Plebejus lupini
Cas	Plebejus lupini	OC	Z	N	Absent	There is no match in this list (species assumed absent)
Cas	Plebejus lupini	CO	MM	Y	Plebejus lupini lupini, Plebejus lupini texanus	Plebejus lupini lupini Plebejus lupini texanus
MPG	Plebejus lupini	Cas	PM	N	Plebejus lupini	Plebejus lupini
MPG	Plebejus lupini	CO	MM	Y	Plebejus lupini lupini, Plebejus lupini texanus	Plebejus lupini lupini Plebejus lupini texanus There is no exact match in this list. Proceed with caution. Programs differ in taxonomic granularity. User should ensure compatibility.
CO	Plebejus lupini lupini	Cas	Com	Y	Plebejus lupini	Plebejus lupini Receiver project collects data at subspecies level. Donor project collects data at species level. Data is NOT compatible UNLESS receiver includes data from both subspecies. User should ensure compatibility.
CO	Plebejus lupini texanus	Cas	Com	Y	Plebejus lupini	Plebejus lupini Receiver project collects data at subspecies level. Donor project collects data at species level. Data is NOT compatible UNLESS receiver includes data from both subspecies. User should ensure compatibility.
CO	Plebejus lupini lupini	MPG	Com	Y	Plebejus lupini	Plebejus lupini Receiver project collects data at subspecies level. Donor project collects data at species level. Data is NOT compatible UNLESS receiver includes data from both subspecies. User should ensure compatibility.
CO	Plebejus lupini texanus	MPG	Com	Y	Plebejus lupini	Plebejus lupini Receiver project collects data at subspecies level. Donor project collects data at species level. Data is NOT compatible UNLESS receiver includes data from both subspecies. User should ensure compatibility.
IL	Colias eurytheme/philodice	IA	MM	Y	Colias eurytheme, Colias philodice	Colias philodice|Colias eurytheme There is no exact match in this list. Proceed with caution. Because one of these projects collects data without distinguishing the two species, data between these programs are NOT compatible UNLESS analyses combine data from both species at both projects.
IL	Colias eurytheme/philodice	MI	MM	Y	Colias philodice, Colias eurytheme	Colias philodice|Colias eurytheme There is no exact match in this list. Proceed with caution. Because one of these projects collects data without distinguishing the two species, data between these programs are NOT compatible UNLESS analyses combine data from both species at both projects.
IL	Colias eurytheme/philodice	OH	MM	Y	Colias philodice, Colias eurytheme	Colias philodice|Colias eurytheme There is no exact match in this list. Proceed with caution. Because one of these projects collects data without distinguishing the two species, data between these programs are NOT compatible UNLESS analyses combine data from both species at both projects.
IL	Colias eurytheme/philodice	TN	PM	N	Colias eurytheme/philodice	Colias eurytheme/philodice
IL	Colias eurytheme/philodice	FLorida	MM	Y	Colias philodice, Colias eurytheme	Colias philodice|Colias eurytheme There is no exact match in this list. Proceed with caution. Because one of these projects collects data without distinguishing the two species, data between these programs are NOT compatible UNLESS analyses combine data from both species at both projects.
IL	Colias eurytheme/philodice	Cas	MM	Y	Colias philodice, Colias eurytheme	Colias philodice|Colias eurytheme There is no exact match in this list. Proceed with caution. Because one of these projects collects data without distinguishing the two species, data between these programs are NOT compatible UNLESS analyses combine data from both species at both projects.
IL	Colias eurytheme/philodice	MPG	MM	Y	Colias philodice, Colias eurytheme	Colias philodice|Colias eurytheme There is no exact match in this list. Proceed with caution. Because one of these projects collects data without distinguishing the two species, data between these programs are NOT compatible UNLESS analyses combine data from both species at both projects.
IL	Colias eurytheme/philodice	CO	MM	Y	Colias philodice, Colias eurytheme	Colias philodice|Colias eurytheme There is no exact match in this list. Proceed with caution. Because one of these projects collects data without distinguishing the two species, data between these programs are NOT compatible UNLESS analyses combine data from both species at both projects.
IL	Colias eurytheme/philodice	OC	EM,Z	Y	Colias eurytheme	Colias eurytheme Data for this taxon CANNOT be combined between these monitoring programs. One of these programs collects data for two taxa as a complex without distinguishing the species. The other program collects data for only one of the taxa in the complex.
IA	Colias eurytheme	IL	Com	Y	Colias eurytheme/philodice	Colias eurytheme/philodice There is no exact match in this list. Proceed with caution. Only combine these data if both C. eurytheme and C. philodice from Iowa are combined with C. eurytheme/philodice from Illinois. Because one of these projects collects data without distinguishing the two species, data between these programs are NOT compatible UNLESS analyses combine data from both species at bot…
IA	Colias philodice	IL	Com	Y	Colias eurytheme/philodice	Colias eurytheme/philodice There is no exact match in this list. Proceed with caution. Only combine these data if both C. eurytheme and C. philodice from Iowa are combined with C. eurytheme/philodice from Illinois. Because one of these projects collects data without distinguishing the two species, data between these programs are NOT compatible UNLESS analyses combine data from both species at bot…
IA	Colias eurytheme	MI	PM	N	Colias eurytheme	Colias eurytheme
IA	Colias philodice	MI	PM	N	Colias philodice	Colias philodice
IA	Colias eurytheme	OH	PM	N	Colias eurytheme	Colias eurytheme
IA	Colias philodice	OH	PM	N	Colias philodice	Colias philodice
IA	Colias eurytheme	TN	Com	Y	Colias eurytheme/philodice	Colias eurytheme/philodice There is no exact match in this list. Proceed with caution. Only combine these data ifbothC. eurytheme and C. philodice from Iowa are combined with C. eurytheme/philodice from Tennessee. Because one of these projects collects data without distinguishing the two species, data between these programs are NOT compatible UNLESS analyses combine data from both species at both…
IA	Colias philodice	TN	Com	Y	Colias eurytheme/philodice	Colias eurytheme/philodice There is no exact match in this list. Proceed with caution. Only combine these data ifbothC. eurytheme and C. philodice from Iowa are combined with C. eurytheme/philodice from Tennessee. Because one of these projects collects data without distinguishing the two species, data between these programs are NOT compatible UNLESS analyses combine data from both species at both…
IA	Colias eurytheme	Cas	PM	N	Colias eurytheme	Colias eurytheme
IA	Colias philodice	Cas	PM	N	Colias philodice	Colias philodice
IA	Colias eurytheme	MPG	PM	N	Colias eurytheme	Colias eurytheme
IA	Colias philodice	MPG	PM	N	Colias philodice	Colias philodice
IA	Colias eurytheme	OC	PM	N	Colias eurytheme	Colias eurytheme
IA	Colias philodice	OC	Z	N	Absent	There is no match in this list (species assumed absent)
MI	Colias eurytheme	IL	Com	Y	Colias eurytheme/philodice	Colias eurytheme/philodice There is no exact match in this list. Proceed with caution. Only combine these data if both C. eurytheme and C. philodice from Michigan are combined with C. eurytheme/philodice from Illinois. Because one of these projects collects data without distinguishing the two species, data between these programs are NOT compatible UNLESS analyses combine data from both species at…
MI	Colias philodice	IL	Com	Y	Colias eurytheme/philodice	Colias eurytheme/philodice There is no exact match in this list. Proceed with caution. Only combine these data if both C. eurytheme and C. philodice from Michigan are combined with C. eurytheme/philodice from Illinois. Because one of these projects collects data without distinguishing the two species, data between these programs are NOT compatible UNLESS analyses combine data from both species at…
MI	Colias eurytheme	IA	PM	N	Colias eurytheme	Colias eurytheme
MI	Colias philodice	IA	PM	N	Colias philodice	Colias philodice
MI	Colias eurytheme	TN	Com	Y	Colias eurytheme/philodice	Colias eurytheme/philodice There is no exact match in this list. Proceed with caution. Only combine these data if both C. eurytheme and C. philodice from Michigan are combined with C. eurytheme/philodice from Tennessee. Because one of these projects collects data without distinguishing the two species, data between these programs are NOT compatible UNLESS analyses combine data from both species a…
MI	Colias philodice	TN	Com	Y	Colias eurytheme/philodice	Colias eurytheme/philodice There is no exact match in this list. Proceed with caution. Only combine these data if both C. eurytheme and C. philodice from Michigan are combined with C. eurytheme/philodice from Tennessee. Because one of these projects collects data without distinguishing the two species, data between these programs are NOT compatible UNLESS analyses combine data from both species a…
MI	Colias eurytheme	Cas	PM	N	Colias eurytheme	Colias eurytheme
MI	Colias philodice	Cas	PM	N	Colias philodice	Colias philodice
MI	Colias eurytheme	MPG	PM	N	Colias eurytheme	Colias eurytheme
MI	Colias philodice	MPG	PM	N	Colias philodice	Colias philodice
MI	Colias eurytheme	CO	PM	N	Colias eurytheme	Colias eurytheme
MI	Colias philodice	CO	PM	N	Colias philodice	Colias philodice
MI	Colias eurytheme	OC	PM	N	Colias eurytheme	Colias eurytheme
MI	Colias philodice	OC	PM	N	Z	There is no match in this list (species assumed absent)
OH	Colias eurytheme	IL	Com	Y	Colias eurytheme/philodice	Colias eurytheme/philodice There is no exact match in this list. Proceed with caution. Only combine these data if both C. eurytheme and C. philodice from Ohio are combined with C. eurytheme/philodice from Illinois. Because one of these projects collects data without distinguishing the two species, data between these programs are NOT compatible UNLESS analyses combine data from both species at bot…
OH	Colias philodice	IL	Com	Y	Colias eurytheme/philodice	Colias eurytheme/philodice There is no exact match in this list. Proceed with caution. Only combine these data if both C. eurytheme and C. philodice from Ohio are combined with C. eurytheme/philodice from Illinois. Because one of these projects collects data without distinguishing the two species, data between these programs are NOT compatible UNLESS analyses combine data from both species at bot…
OH	Colias eurytheme	IA	PM	N	Colias eurytheme	Colias eurytheme
OH	Colias philodice	IA	PM	N	Colias philodice	Colias philodice
OH	Colias eurytheme	MI	PM	N	Colias eurytheme	Colias eurytheme
OH	Colias philodice	MI	PM	N	Colias philodice	Colias philodice
OH	Colias eurytheme	TN	Com	Y	Colias eurytheme/philodice	Colias eurytheme/philodice There is no exact match in this list. Proceed with caution. Only combine these data if both C. eurytheme and C. philodice from Ohio are combined with C. eurytheme/philodice from Tennessee. Because one of these projects collects data without distinguishing the two species, data between these programs are NOT compatible UNLESS analyses combine data from both species at bo…
OH	Colias philodice	TN	Com	Y	Colias eurytheme/philodice	Colias eurytheme/philodice There is no exact match in this list. Proceed with caution. Only combine these data if both C. eurytheme and C. philodice from Ohio are combined with C. eurytheme/philodice from Tennessee. Because one of these projects collects data without distinguishing the two species, data between these programs are NOT compatible UNLESS analyses combine data from both species at bo…
OH	Colias eurytheme	FL	PM	N	Colias eurytheme	Colias eurytheme
OH	Colias philodice	FL	PM	N	Colias philodice	Colias philodice
OH	Colias eurytheme	Cas	PM	N	Colias eurytheme	Colias eurytheme
OH	Colias philodice	Cas	PM	N	Colias philodice	Colias philodice
OH	Colias eurytheme	MPG	PM	N	Colias eurytheme	Colias eurytheme
OH	Colias philodice	MPG	PM	N	Colias philodice	Colias philodice
OH	Colias eurytheme	CO	PM	N	Colias eurytheme	Colias eurytheme
OH	Colias philodice	CO	PM	N	Colias philodice	Colias philodice
OH	Colias eurytheme	OC	PM	N	Colias eurytheme	Colias eurytheme
OH	Colias philodice	OC	Z	N	Absent	There is no match in this list (species assumed absent)
TN	Colias eurytheme/philodice	IL	PM	N	Colias eurytheme/philodice	Colias eurytheme/philodice
TN	Colias eurytheme/philodice	IA	MM	Y	Colias philodice, Colias eurytheme	Colias philodice, Colias eurytheme There is no exact match in this list. Proceed with caution. Because one of these projects collects data without distinguishing the two species, data between these programs are NOT compatible UNLESS analyses combine data from both species at both projects.
TN	Colias eurytheme/philodice	MI	MM	Y	Colias philodice, Colias eurytheme	Colias philodice, Colias eurytheme There is no exact match in this list. Proceed with caution. Because one of these projects collects data without distinguishing the two species, data between these programs are NOT compatible UNLESS analyses combine data from both species at both projects.
TN	Colias eurytheme/philodice	OH	MM	Y	Colias philodice, Colias eurytheme	Colias philodice, Colias eurytheme There is no exact match in this list. Proceed with caution. Because one of these projects collects data without distinguishing the two species, data between these programs are NOT compatible UNLESS analyses combine data from both species at both projects.
TN	Colias eurytheme/philodice	FL	MM	Y	Colias philodice, Colias eurytheme	Colias philodice, Colias eurytheme There is no exact match in this list. Proceed with caution. Because one of these projects collects data without distinguishing the two species, data between these programs are NOT compatible UNLESS analyses combine data from both species at both projects.
TN	Colias eurytheme/philodice	Cas	MM	Y	Colias philodice, Colias eurytheme	Colias philodice, Colias eurytheme There is no exact match in this list. Proceed with caution. Because one of these projects collects data without distinguishing the two species, data between these programs are NOT compatible UNLESS analyses combine data from both species at both projects.
TN	Colias eurytheme/philodice	MPG	MM	Y	Colias philodice, Colias eurytheme	Colias philodice, Colias eurytheme There is no exact match in this list. Proceed with caution. Because one of these projects collects data without distinguishing the two species, data between these programs are NOT compatible UNLESS analyses combine data from both species at both projects.
TN	Colias eurytheme/philodice	CO	MM	Y	Colias philodice, Colias eurytheme	Colias philodice, Colias eurytheme There is no exact match in this list. Proceed with caution. Because one of these projects collects data without distinguishing the two species, data between these programs are NOT compatible UNLESS analyses combine data from both species at both projects.
TN	Colias eurytheme/philodice	OC	EM,Z	Y	Colias eurytheme	Colias eurytheme Data for this taxon CANNOT be combined between these monitoring programs. One of these programs collects data for two taxa as a complex without distinguishing the species. The other program collects data for only one of the taxa in the complex.
FL	Colias eurytheme	Illinois	Com	Y	Colias eurytheme/philodice	Colias eurytheme/philodice There is no exact match in this list. Proceed with caution. Only combine these data if both C. eurytheme and C. philodice from Florida are combined with C. eurytheme/philodice from Illinois. Because one of these projects collects data without distinguishing the two species, data between these programs are NOT compatible UNLESS analyses combine data from both species at …
FL	Colias philodice	Illinois	Com	Y	Colias eurytheme/philodice	Colias eurytheme/philodice There is no exact match in this list. Proceed with caution. Only combine these data if both C. eurytheme and C. philodice from Florida are combined with C. eurytheme/philodice from Illinois. Because one of these projects collects data without distinguishing the two species, data between these programs are NOT compatible UNLESS analyses combine data from both species at …
FL	Colias eurytheme	Tennessee	Com	Y	Colias eurytheme/philodice	Colias eurytheme/philodice There is no exact match in this list. Proceed with caution. Only combine these data if both C. eurytheme and C. philodice from Florida are combined with C. eurytheme/philodice from Illinois. Because one of these projects collects data without distinguishing the two species, data between these programs are NOT compatible UNLESS analyses combine data from both species at …
FL	Colias philodice	Tennessee	Com	Y	Colias eurytheme/philodice	Colias eurytheme/philodice There is no exact match in this list. Proceed with caution. Only combine these data if both C. eurytheme and C. philodice from Florida are combined with C. eurytheme/philodice from Illinois. Because one of these projects collects data without distinguishing the two species, data between these programs are NOT compatible UNLESS analyses combine data from both species at …
FL	Colias eurytheme	Cascades	PM	N	Colias eurytheme	Colias eurytheme
FL	Colias philodice	Cascades	PM	N	Colias philodice	Colias philodice
FL	Colias eurytheme	MPG	PM	N	Colias eurytheme	Colias eurytheme
FL	Colias philodice	MPG	PM	N	Colias philodice	Colias philodice
FL	Colias eurytheme	OC	PM	N	Colias eurytheme	Colias eurytheme
FL	Colias philodice	OC	Z	N	Absent	There is no match in this list (species assumed absent)
Cas	Colias eurytheme	IL	Com	Y	Colias eurytheme/philodice	Colias eurytheme/philodice There is no exact match in this list. Proceed with caution. Only combine these data if both C. eurytheme and C. philodice from Cascades are combined with C. eurytheme/philodice from Illinois. Because one of these projects collects data without distinguishing the two species, data between these programs are NOT compatible UNLESS analyses combine data from both species at…
Cas	Colias philodice	IL	Com	Y	Colias eurytheme/philodice	Colias eurytheme/philodice There is no exact match in this list. Proceed with caution. Only combine these data if both C. eurytheme and C. philodice from Cascades are combined with C. eurytheme/philodice from Illinois. Because one of these projects collects data without distinguishing the two species, data between these programs are NOT compatible UNLESS analyses combine data from both species at…
Cas	Colias eurytheme	IA	PM	N	Colias eurytheme	Colias eurytheme
Cas	Colias philodice	IA	PM	N	Colias philodice	There is no match in this list (species assumed absent)
Cas	Colias eurytheme	MI	PM	N	Colias eurytheme	Colias eurytheme
Cas	Colias philodice	MI	PM	N	Colias philodice	There is no match in this list (species assumed absent)
Cas	Colias eurytheme	OH	PM	N	Colias eurytheme	Colias eurytheme
Cas	Colias philodice	OH	PM	N	Colias philodice	There is no match in this list (species assumed absent)
Cas	Colias eurytheme	TN	Com	Y	Colias eurytheme/philodice	Colias eurytheme/philodice There is no exact match in this list. Proceed with caution. Only combine these data if both C. eurytheme and C. philodice from Cascades are combined with C. eurytheme/philodice from Tennessee. Because one of these projects collects data without distinguishing the two species, data between these programs are NOT compatible UNLESS analyses combine data from both species a…
Cas	Colias philodice	TN	Com	Y	Colias eurytheme/philodice	Colias eurytheme/philodice There is no exact match in this list. Proceed with caution. Only combine these data if both C. eurytheme and C. philodice from Cascades are combined with C. eurytheme/philodice from Tennessee. Because one of these projects collects data without distinguishing the two species, data between these programs are NOT compatible UNLESS analyses combine data from both species a…
Cas	Colias eurytheme	FL	PM	N	Colias eurytheme	Colias eurytheme
Cas	Colias philodice	FL	PM	N	Colias philodice	Colias philodice
Cas	Colias eurytheme	MPG	PM	N	Colias eurytheme	Colias eurytheme
Cas	Colias philodice	MPG	PM	N	Colias philodice	Colias philodice
Cas	Colias eurytheme	CO	PM	N	Colias eurytheme	Colias eurytheme
Cas	Colias philodice	CO	PM	N	Colias philodice	Colias philodice
Cas	Colias eurytheme	OC	PM	N	Colias eurytheme	Colias eurytheme
Cas	Colias philodice	OC	Z	N	Absent	There is no match in this list (species assumed absent)
MPG	Colias eurytheme	IL	Com	Y	Colias eurytheme/philodice	Colias eurytheme/philodice There is no exact match in this list. Proceed with caution. Only combine these data ifbothC. eurytheme and C. philodice from MPG are combined with C. eurytheme/philodice from Illinois. Because one of these projects collects data without distinguishing the two species, data between these programs are NOT compatible UNLESS analyses combine data from both species at both p…
MPG	Colias philodice	IL	Com	Y	Colias eurytheme/philodice	Colias eurytheme/philodice There is no exact match in this list. Proceed with caution. Only combine these data ifbothC. eurytheme and C. philodice from MPG are combined with C. eurytheme/philodice from Illinois. Because one of these projects collects data without distinguishing the two species, data between these programs are NOT compatible UNLESS analyses combine data from both species at both p…
MPG	Colias eurytheme	IA	PM	N	Colias eurytheme	Colias eurytheme
MPG	Colias philodice	IA	PM	N	Colias philodice	There is no match in this list (species assumed absent)
MPG	Colias eurytheme	MI	PM	N	Colias eurytheme	Colias eurytheme
MPG	Colias philodice	MI	PM	N	Colias philodice	There is no match in this list (species assumed absent)
MPG	Colias eurytheme	OH	PM	N	Colias eurytheme	Colias eurytheme
MPG	Colias philodice	OH	PM	N	Colias philodice	There is no match in this list (species assumed absent)
MPG	Colias eurytheme	TN	Com	Y	Colias eurytheme/philodice	Colias eurytheme/philodice There is no exact match in this list. Proceed with caution. Only combine these data ifbothC. eurytheme and C. philodice from MPG are combined with C. eurytheme/philodice from Tennessee. Because one of these projects collects data without distinguishing the two species, data between these programs are NOT compatible UNLESS analyses combine data from both species at both …
MPG	Colias philodice	TN	Com	Y	Colias eurytheme/philodice	Colias eurytheme/philodice There is no exact match in this list. Proceed with caution. Only combine these data ifbothC. eurytheme and C. philodice from MPG are combined with C. eurytheme/philodice from Tennessee. Because one of these projects collects data without distinguishing the two species, data between these programs are NOT compatible UNLESS analyses combine data from both species at both …
MPG	Colias eurytheme	FL	PM	N	Colias eurytheme	Colias eurytheme
MPG	Colias philodice	FL	PM	N	Colias philodice	Colias philodice
MPG	Colias eurytheme	Cas	PM	N	Colias eurytheme	Colias eurytheme
MPG	Colias philodice	Cas	PM	N	Colias philodice	Colias philodice
MPG	Colias eurytheme	CO	PM	N	Colias eurytheme	Colias eurytheme
MPG	Colias philodice	CO	PM	N	Colias philodice	Colias philodice
MPG	Colias eurytheme	OC	PM	N	Colias eurytheme	Colias eurytheme
MPG	Colias philodice	OC	Z	N	Absent	There is no match in this list (species assumed absent)
CO	Colias eurytheme	IL	Com	Y	Colias eurytheme/philodice	Colias eurytheme/philodice There is no exact match in this list. Proceed with caution. Only combine these data if both C. eurytheme and C. philodice from Colorado are combined with C. eurytheme/philodice from Illinois. Because one of these projects collects data without distinguishing the two species, data between these programs are NOT compatible UNLESS analyses combine data from both species at…
CO	Colias philodice	IL	Com	Y	Colias eurytheme/philodice	Colias eurytheme/philodice There is no exact match in this list. Proceed with caution. Only combine these data if both C. eurytheme and C. philodice from Colorado are combined with C. eurytheme/philodice from Illinois. Because one of these projects collects data without distinguishing the two species, data between these programs are NOT compatible UNLESS analyses combine data from both species at…
CO	Colias eurytheme	TN	Com	Y	Colias eurytheme/philodice	Colias eurytheme/philodice There is no exact match in this list. Proceed with caution. Only combine these data if both C. eurytheme and C. philodice from Colorado are combined with C. eurytheme/philodice from Tennessee. Because one of these projects collects data without distinguishing the two species, data between these programs are NOT compatible UNLESS analyses combine data from both species a…
CO	Colias philodice	TN	Com	Y	Colias eurytheme/philodice	Colias eurytheme/philodice There is no exact match in this list. Proceed with caution. Only combine these data if both C. eurytheme and C. philodice from Colorado are combined with C. eurytheme/philodice from Tennessee. Because one of these projects collects data without distinguishing the two species, data between these programs are NOT compatible UNLESS analyses combine data from both species a…
CO	Colias eurytheme	Cas	PM	N	Colias eurytheme	Colias eurytheme
CO	Colias philodice	Cas	PM	N	Colias philodice	Colias philodice
CO	Colias eurytheme	MPG	PM	N	Colias eurytheme	Colias eurytheme
CO	Colias philodice	MPG	PM	N	Colias philodice	Colias philodice
CO	Colias eurytheme	OC	PM	N	Colias eurytheme	Colias eurytheme
CO	Colias philodice	OC	Z	N	Absent	There is no match in this list (species assumed absent)
Orange	Colias eurytheme	IL	Com*	Y	Colias eurytheme/philodice	Colias eurytheme/philodice Data for this taxon CANNOT be combined between these monitoring programs. One of these programs collects data for two taxa as a complex without distinguishing the species. The other program collects data for only one of the taxa in the complex.
Orange	Colias philodice	IL	Absent from start list	Y	Error: not on receiver list	This taxon is not collected by starting program as entered. Check spelling and/or whether this taxon occurs in starting program
Orange	Colias eurytheme	IA	PM	N	Colias eurytheme	Colias eurytheme
Orange	Colias philodice	IA	Absent from start list	Y	Error: not on receiver list	This taxon is not collected by starting program as entered. Check spelling and/or whether this taxon occurs in starting program
Orange	Colias eurytheme	MI	PM	N	Colias eurytheme	Colias eurytheme
Orange	Colias philodice	MI	Absent from start list	Y	Error: not on receiver list	This taxon is not collected by starting program as entered. Check spelling and/or whether this taxon occurs in starting program
Orange	Colias eurytheme	OH	PM	N	Colias eurytheme	Colias eurytheme
Orange	Colias philodice	OH	Absent from start list	Y	Error: not on receiver list	This taxon is not collected by starting program as entered. Check spelling and/or whether this taxon occurs in starting program
Orange	Colias eurytheme	TN	Com*	Y	Colias eurytheme/philodice	Colias eurytheme/philodice Data for this taxon CANNOT be combined between these monitoring programs. One of these programs collects data for two taxa as a complex without distinguishing the species. The other program collects data for only one of the taxa in the complex.
Orange	Colias philodice	TN	Absent from start list	Y	Error: not on receiver list	This taxon is not collected by starting program as entered. Check spelling and/or whether this taxon occurs in starting program
Orange	Colias eurytheme	FL	PM	N	Colias eurytheme	Colias eurytheme
Orange	Colias philodice	FL	Absent from start list	Y	Error: not on receiver list	This taxon is not collected by starting program as entered. Check spelling and/or whether this taxon occurs in starting program
Orange	Colias eurytheme	Cas	PM	N	Colias eurytheme	Colias eurytheme
Orange	Colias philodice	Cas	Absent from start list	Y	Error: not on receiver list	This taxon is not collected by starting program as entered. Check spelling and/or whether this taxon occurs in starting program
Orange	Colias eurytheme	MPG	PM	N	Colias eurytheme	Colias eurytheme
Orange	Colias philodice	MPG	Absent from start list	Y	Error: not on receiver list	This taxon is not collected by starting program as entered. Check spelling and/or whether this taxon occurs in starting program
Orange	Colias eurytheme	CO	PM	N	Colias eurytheme	Colias eurytheme
Orange	Colias philodice	CO	Absent from start list	Y	Error: not on receiver list	This taxon is not collected by starting program as entered. Check spelling and/or whether this taxon occurs in starting program
IL	Pyrgus communis	IA	PM	N	Pyrgus communis	Pyrgus communis
IL	Pyrgus communis	TN	Com*	Y	Pyrgus communis/albescens	Pyrgus communis/albescens There is no exact match in this list. Proceed with caution. One of these programs collects data for both taxa as a complex without distinguishing the species. The other program only includes one of the taxa in the complex. Data for this taxon CANNOT be combined between projects.
IL	Pyrgus communis	OC	Z	N	Absent	There is no match in this list (species assumed absent)
IA	Pyrgus communis	IL	PM	N	Pyrgus communis	Pyrgus communis
IA	Pyrgus communis	TN	Com*	Y	Pyrgus communis/albescens	Pyrgus communis/albescens There is no exact match in this list. Proceed with caution. One of these programs collects data for both taxa as a complex without distinguishing the species. The other program only includes one of the taxa in the complex. Data for this taxon CANNOT be combined between projects.
IA	Pyrgus communis	OC	Z	N	Absent	There is no match in this list (species assumed absent).
MI	Pyrgus communis	OH	PM	N	Pyrgus communis	Pyrgus communis
MI	Pyrgus communis	TN	Com*	Y	Pyrgus communis/albescens	Pyrgus communis/albescens There is no exact match in this list. Proceed with caution. One of these programs collects data for both taxa as a complex without distinguishing the species. The other program only includes one of the taxa in the complex. Data for this taxon CANNOT be combined between projects.
MI	Pyrgus communis	OC	Z	N	absent	There is no match in this list (species assumed absent).
OH	Pyrgus communis	FL	PM	N	Pyrgus communis	Pyrgus communis
OH	Pyrgus communis	TN	Com*	Y	Pyrgus communis/albescens	Pyrgus communis/albescens There is no exact match in this list. Proceed with caution. One of these programs collects data for both taxa as a complex without distinguishing the species. The other program only includes one of the taxa in the complex. Data for this taxon CANNOT be combined between projects.
OH	Pyrgus communis	OC	Z	N	absent	There is no match in this list (species assumed absent).
TN	Pyrgus communis/albescens	IL	EM,Z	Y	Pyrgus communis	Pyrgus communis There is no exact match in this list. Proceed with caution. One of these programs collects data for both taxa as a complex without distinguishing the species. The other program only includes one of the taxa in the complex. Data for this taxon CANNOT be combined between projects.
TN	Pyrgus communis/albescens	IA	EM,Z	Y	Pyrgus communis	Pyrgus communis There is no exact match in this list. Proceed with caution. One of these programs collects data for both taxa as a complex without distinguishing the species. The other program only includes one of the taxa in the complex. Data for this taxon CANNOT be combined between projects.
TN	Pyrgus communis/albescens	MI	EM,Z	Y	Pyrgus communis	Pyrgus communis There is no exact match in this list. Proceed with caution. One of these programs collects data for both taxa as a complex without distinguishing the species. The other program only includes one of the taxa in the complex. Data for this taxon CANNOT be combined between projects.
TN	Pyrgus communis/albescens	OH	EM,Z	Y	Pyrgus communis	Pyrgus communis There is no exact match in this list. Proceed with caution. One of these programs collects data for both taxa as a complex without distinguishing the species. The other program only includes one of the taxa in the complex. Data for this taxon CANNOT be combined between projects.
TN	Pyrgus communis/albescens	FL	MM	Y	Pyrgus communis, Pyrgus albescens	Pyrgus communis|Pyrgus albescens There is no exact match in this list. Proceed with caution. Because one of these projects collects data without distinguishing the two species, data between these programs are NOT compatible UNLESS analyses combine data from both species at both projects.
TN	Pyrgus communis/albescens	Cas	EM,Z	Y	Pyrgus communis	Pyrgus communis There is no exact match in this list. Proceed with caution. One of these programs collects data for both taxa as a complex without distinguishing the species. The other program only includes one of the taxa in the complex. Data for this taxon CANNOT be combined between projects.
TN	Pyrgus communis/albescens	MPG	EM,Z	Y	Pyrgus communis	Pyrgus communis There is no exact match in this list. Proceed with caution. One of these programs collects data for both taxa as a complex without distinguishing the species. The other program only includes one of the taxa in the complex. Data for this taxon CANNOT be combined between projects.
TN	Pyrgus communis/albescens	CO	EM,Z	Y	Pyrgus communis	Pyrgus communis There is no exact match in this list. Proceed with caution. One of these programs collects data for both taxa as a complex without distinguishing the species. The other program only includes one of the taxa in the complex. Data for this taxon CANNOT be combined between projects.
TN	Pyrgus communis/albescens	OC	Z,EM	Y	Pyrgus albescens	Pyrgus albescens There is no exact match in this list. Proceed with caution. One of these programs collects data for both taxa as a complex without distinguishing the species. The other program only includes one of the taxa in the complex. Data for this taxon CANNOT be combined between projects.
FL	Pyrgus communis	Cas	PM	N	Pyrgus communis	Pyrgus communis
FL	Pyrgus communis	TN	com	Y	Pyrgus communis/albescens	Pyrgus communis/albescens There is no exact match in this list. Proceed with caution. Because one of these projects collects data without distinguishing the two species, data between these programs are NOT compatible UNLESS analyses combine data from both species at both projects.
FL	Pyrgus communis	OC	Z	N	Absent	There is no match in this list (species assumed absent).
Cas	Pyrgus communis	MPG	PM	N	Pyrgus communis	Pyrgus communis
Cas	Pyrgus communis	TN	Com*	Y	Pyrgus communis/albescens	Pyrgus communis/albescens There is no exact match in this list. Proceed with caution. One of these programs collects data for both taxa as a complex without distinguishing the species. The other program only includes one of the taxa in the complex. Data for this taxon CANNOT be combined between projects.
Cas	Pyrgus communis	OC	Z	N	Absent	There is no match in this list (species assumed absent).
MPG	Pyrgus communis	CO	PM	N	Pyrgus communis	Pyrgus communis
MPG	Pyrgus communis	TN	Com*	Y	Pyrgus communis/albescens	Pyrgus communis/albescens There is no exact match in this list. Proceed with caution. One of these programs collects data for both taxa as a complex without distinguishing the species. The other program only includes one of the taxa in the complex. Data for this taxon CANNOT be combined between projects.
MPG	Pyrgus communis	OC	Z	N	Absent	There is no match in this list (species assumed absent).
CO	Pyrgus communis	IA	PM	N	Pyrgus communis	Pyrgus communis
CO	Pyrgus communis	TN	Com*	Y	Pyrgus communis/albescens	Pyrgus communis/albescens There is no exact match in this list. Proceed with caution. One of these programs collects data for both taxa as a complex without distinguishing the species. The other program only includes one of the taxa in the complex. Data for this taxon CANNOT be combined between projects.
CO	Pyrgus communis	OC	Z	N	Absent	There is no match in this list (species assumed absent).
FL	Pyrgus albescens	IL	Z	N	Absent	There is no match in this list (species assumed absent).
FL	Pyrgus albescens	IA	Z	N	Absent	There is no match in this list (species assumed absent).
FL	Pyrgus albescens	MI	Z	N	Absent	There is no match in this list (species assumed absent).
FL	Pyrgus albescens	OH	Z	N	Absent	There is no match in this list (species assumed absent).
FL	Pyrgus albescens	TN	com	Y	Pyrgus communis/albescens	Pyrgus communis/albescens There is no exact match in this list. Proceed with caution. Because one of these projects collects data without distinguishing the two species, data between these programs are NOT compatible UNLESS analyses combine data from both species at both projects.
FL	Pyrgus albescens	Cas	Z	N	Absent	There is no match in this list (species assumed absent).
FL	Pyrgus albescens	MPG	Z	N	Absent	There is no match in this list (species assumed absent).
FL	Pyrgus albescens	CO	Z	N	Absent	There is no match in this list (species assumed absent).
FL	Pyrgus albescens	OC	PM	N	Pyrgus albescens	Pyrgus albescens
Orange	Pyrgus albescens	IL	Z	N	Absent	There is no match in this list (species assumed absent).
Orange	Pyrgus albescens	IA	Z	N	Absent	There is no match in this list (species assumed absent).
Orange	Pyrgus albescens	MI	Z	N	Absent	There is no match in this list (species assumed absent).
Orange	Pyrgus albescens	OH	Z	N	Absent	There is no match in this list (species assumed absent).
Orange	Pyrgus albescens	TN	Com*	Y	Pyrgus communis/albescens	Pyrgus communis/albescens There is no exact match in this list. Proceed with caution. One of these programs collects data for both taxa as a complex without distinguishing the species. The other program only includes one of the taxa in the complex. Data for this taxon CANNOT be combined between projects.
Orange	Pyrgus albescens	FL	PM	N	Pyrgus albescens	Pyrgus albescens
Orange	Pyrgus albescens	Cas	Z	N	Absent	There is no match in this list (species assumed absent).
Orange	Pyrgus albescens	MPG	Z	N	Absent	There is no match in this list (species assumed absent).
Orange	Pyrgus albescens	CO	Z	N	Absent	There is no match in this list (species assumed absent).
IL	Pyrgus albescens	IA	Absent from start list		Starting list does not have this taxon	This taxon is not monitored by starting program as entered. Check spelling and/or whether this taxon occurs in starting program.
TN	Pyrgus communis	IA	Absent from start list		Starting list does not have this taxon	This taxon is not monitored by starting program as entered. Check spelling and/or whether this taxon occurs in starting program.
TN	Pyrgus communis	IL	Absent from start list		Starting list does not have this taxon	This taxon is not monitored by starting program as entered. Check spelling and/or whether this taxon occurs in starting program.
TN	Pyrgus communis	MI	Absent from start list		Starting list does not have this taxon	This taxon is not monitored by starting program as entered. Check spelling and/or whether this taxon occurs in starting program.
TN	Pyrgus communis	OH	Absent from start list		Starting list does not have this taxon	This taxon is not monitored by starting program as entered. Check spelling and/or whether this taxon occurs in starting program.
TN	Pyrgus communis	FL	Absent from start list		Starting list does not have this taxon	This taxon is not monitored by starting program as entered. Check spelling and/or whether this taxon occurs in starting program.
TN	Pyrgus communis	Cas	Absent from start list		Starting list does not have this taxon	This taxon is not monitored by starting program as entered. Check spelling and/or whether this taxon occurs in starting program.
TN	Pyrgus communis	MPG	Absent from start list		Starting list does not have this taxon	This taxon is not monitored by starting program as entered. Check spelling and/or whether this taxon occurs in starting program.
TN	Pyrgus communis	Co	Absent from start list		Starting list does not have this taxon	This taxon is not monitored by starting program as entered. Check spelling and/or whether this taxon occurs in starting program.
TN	Pyrgus communis	OC	Absent from start list		Starting list does not have this taxon	This taxon is not monitored by starting program as entered. Check spelling and/or whether this taxon occurs in starting program.
TN	Pyrgus albescens	OC	Absent from start list		Starting list does not have this taxon	This taxon is not monitored by starting program as entered. Check spelling and/or whether this taxon occurs in starting program.
CO	Pyrgus albescens	FL	Absent from start list		Starting list does not have this taxon	This taxon is not monitored by starting program as entered. Check spelling and/or whether this taxon occurs in starting program.
Orange	Callophrys perplexa	Cas	EM	Y	Callophrys dumetorum	Callophrys dumetorum
Cas	Callophrys dumetorum	OC	EM	Y	Callophrys perplexa	Callophrys perplexa
Cas	Satyrium fulginosum semiluna	CO	EM	Y	Satyrium semiluna	Satyrium semiluna There is no exact match in this list. Proceed with caution. Projects collect data with different taxonomic granularity. User should asses.
CO	Satyrium semiluna	Cas	EM	N	Satyrium fulginosum semiluna	Satyrium fulginosum semiluna
Cas	Polygonia gracilis	OH	Z	N	Absent	There is no match in this list (species assumed absent)
Cas	Polygonia gracilis	MPG	EM-s		Polygonia gracilis zephrys	Polygonia gracilis zephyrus
Cas	Polygonia gracilis	CO	MM	Y	Polygonia gracilis, P. zephrys	Polygonia zephrys Polygonia gracilis There is no exact match in this list. Proceed with caution. The Cascades project considers P. zephrys a subspecies of gracilis while the Colorado project considers them to be two different species. Compatible only if data from both taxa are combined. User must assess.
MPG	Polygonia gracilis zephrys	Cas	EM-s	Y	Polygonia gracilis	Polygonia gracilis There is no exact match in this list. Proceed with caution. The projects report this taxon with different taxonomic granularity. May not be compatible. User should assess.
MPG	Polygonia gracilis zephrys	CO	MM/EM-s	Y	Polygonia gracilis, P. zephrys	Polygonia zephrys There is no exact match in this list. Proceed with caution. The MPG project considers P. zephrys a subspecies of gracilis while the Colorado project considers them to be two different species. User must assess compatibility.
CO	Polygonia zephrys	Cas	Com*	Y	Polygonia gracilis	Polygonia gracilis There is no exact match in this list. Proceed with caution. The Cascades project considers P. zephrys a subspecies of gracilis while the Colorado project considers them to be two different species. Compatible only if data from both species are combined. User must assess.
CO	Polygonia zephrys	MPG	EM-s	N	Polygonia gracilis zephrys	Polygonia gracilis zephrys
Orange	Adelpha bredowii	IL	Z	N	Absent	There is no match in this list (species assumed absent)
Orange	Adelpha bredowii	CO	EM	Y	Adelpha eulalia	Adelpha eulalia Proceed with caution. The A. bredowii concept as defined by O&W includes eulalia and californica. However, new research (Prudic et al. 2008) suggests A. bredowii does not occur in N. America, and that A. eulalia and A. californica are distinct taxa. User should asses compatibility
CO	Adelpha eulalia	OC	Z	Y	absent	Adelpha bredowii Proceed with caution. Colorado has updated their understanding of O&W baselist to consider A. eulalia a distinct species not present at Orange County. Orange County's interpretation has not reinterpreted OW's list and considers A. bredowii to contain A. eulalia and A. californica. User should determine compatibility.	To make reciprocal searches equivalent (as required by tool) and allow us to flag this problem for the user, we return a donor response with commentary, rather than absent. Reciprocal search line 584
Orange	Adelpha bredowii	Cas	EM	N	Adelpha californica	Adelpha californica
Cas	Adelpha californica	OC	EM	N	Adelpha bredowii	Adelpha bredowii
CO	Adelpha eulalia	Cas	Z	N	Absent	There is no match in this list (species assumed absent)
Cas	Adelpha californica	CO	Z	N	Absent	There is no match in this list (species assumed absent)
Orange	Euphydryas chalcedona	Cas	EM	Y	Euphydryas colon	Euphydryas colon While MPG and Cas (Pelham) consider colon and chalcedona separate species, Irvine (O&W) considers colon and chalcedona conspecific. User should assess compatibility
Cas	Euphydryas colon	OC	Z	Y	Absent	Euphydryas chalcedona There is no exact match in this list. Proceed with caution. Cascades and MPG consider E. chalcedona and E. colon to be distinct species. Irvine considers E. chalcedona and E. colon conspecific. User must assess.	To make reciprocal searches equivalent (as required by tool) and allow us to flag this problem for the user, we return a donor response with commentary, rather than absent. Reciprocal search line 580
Orange	Euphydryas chalcedona	MPG	EM	Y	Euphydryas colon	Euphydryas colon While MPG and Cas (Pelham) consider colon and chalcedona separate species, Irvine (O&W) considers colon and chalcedona conspecific. User should assess compatibility
MPG	Euphydryas colon	OC	Z	Y	Absent	Euphydryas chalcedona There is no exact match in this list. Proceed with caution. Cascades and MPG consider E. chalcedona and E. colon to be distinct species. Irvine considers E. chalcedona and E. colon conspecific. User must assess.	To make reciprocal searches equivalent (as required by tool) and allow us to flag this problem for the user, we return a donor response with commentary, rather than absent. Reciprocal search line 582
Cas	Euphydryas colon	MPG	PM	N	Euphydryas colon	Euphydryas colon
MPG	Euphydryas colon	Cas	PM	N	Euphydryas colon	Euphydryas colon
Cas	Euphilotes "battoides" on-heracleoides	MPG	EM-s	Y	Euphilotes "battoides"	Euphilotes "battoides" There is no exact match in this list. Proceed with caution. "battoides" refers to a species complex that may be different between projects. Use caustion when combining.
MPG	Euphilotes "battoides"	Cas	EM-s	Y	Euphilotes "battoides" on-heracleoides	Euphilotes "battoides" on-heracleoides There is no exact match in this list. Proceed with caution. "battoides" refers to a species complex that may be different between projects. Use caustion when combining.
Cas	Euphilotes "battoides" on-heracleoides	OC	EM-s	Y	Euphilotes battoides	Euphilotes battoides There is no exact match in this list. Proceed with caution. "battoides" refers to a species complex that may be different between projects. Use caustion when combining.
Orange	Euphilotes battoides	Cas	MM, EM-s, EM	Y	Euphilotes "battoides" on-heracleoides, Euphilotes glaucon	Euphilotes glaucon Euphilotes "battoides" on-heracleoides There is no exact match in this list. Proceed with caution. "battoides" refers to a species complex that may be different between projects. Use caution when combining.
MPG	Euphilotes "battoides"	OC	EM-s	Y	Euphilotes battoides	Euphilotes battoides There is no exact match in this list. Proceed with caution. "battoides" refers to a species complex that may be different between projects. Use caution when combining.
Orange	Euphilotes battoides	MPG	MM, EM-s, EM	Y	E. "battoides", E. glaucon	Euphilotes glaucon Euphilotes "battoides" There is no exact match in this list. Proceed with caution. battoides refers to a species complex that may be different between projects. Use caution when combining.
MI	Speyeria atlantis	OH	PM	N	Speyeria atlantis	Speyeria atlantis
MI	Speyeria atlantis	Cas	MM	Y	Speyeria atlantis, Speyeria hesperis	Speyeria atlantis Speyeria hesperis User beware: these two programs have different taxon concepts of Speyeria atlantis (O&W/Pelham interpretation considers hesperis a separate species; NABA interpretation considers hesperis a subspecies of atlantis)
MI	Speyeria atlantis	MPG	MM	Y	Speyeria atlantis, Speyeria hesperis	Speyeria atlantis Speyeria hesperis User beware: these two programs have different taxon concepts of Speyeria atlantis (O&W/Pelham interpretation considers hesperis a separate species; NABA interpretation considers hesperis a subspecies of atlantis)
MI	Speyeria atlantis	CO	MM	Y	Speyeria atlantis, Speyeria hesperis	Speyeria atlantis Speyeria hesperis User beware: these two programs have different taxon concepts of Speyeria atlantis (O&W/Pelham interpretation considers hesperis a separate species; NABA interpretation considers hesperis a subspecies of atlantis)
Ohio	Speyeria atlantis	MI	PM	N	Speyeria atlantis	Speyeria atlantis
Ohio	Speyeria atlantis	Cas	MM	Y	Speyeria atlantis, Speyeria hesperis	Speyeria atlantis Speyeria hesperis User beware: these two programs have different taxon concepts of Speyeria atlantis (O&W/Pelham interpretation considers hesperis a separate species; NABA interpretation considers hesperis a subspecies of atlantis)
Ohio	Speyeria atlantis	MPG	MM	Y	Speyeria atlantis, Speyeria hesperis	Speyeria atlantis Speyeria hesperis User beware: these two programs have different taxon concepts of Speyeria atlantis (O&W/Pelham interpretation considers hesperis a separate species; NABA interpretation considers hesperis a subspecies of atlantis)
Ohio	Speyeria atlantis	CO	MM	Y	Speyeria atlantis, Speyeria hesperis	Speyeria atlantis Speyeria hesperis User beware: these two programs have different taxon concepts of Speyeria atlantis (O&W/Pelham interpretation considers hesperis a separate species; NABA interpretation considers hesperis a subspecies of atlantis)
Cas	Speyeria atlantis	MI	EM	Y	Speyeria atlantis	Speyeria atlantis User beware: these two programs have different taxon concepts of Speyeria atlantis (O&W/Pelham interpretation considers hesperis a separate species; NABA interpretation considers hesperis a subspecies of atlantis)
Cas	Speyeria atlantis	OH	EM	Y	Speyeria atlantis	Speyeria atlantis User beware: these two programs have different taxon concepts of Speyeria atlantis (O&W/Pelham interpretation considers hesperis a separate species; NABA interpretation considers hesperis a subspecies of atlantis)
Cas	Speyeria atlantis	MPG	PM	N	Speyeria atlantis	Speyeria atlantis
Cas	Speyeria atlantis	CO	PM	N	Speyeria atlantis	Speyeria atlantis
MPG	Speyeria atlantis	MI	EM	Y	Speyeria atlantis	Speyeria atlantis User beware: these two programs have different taxon concepts of Speyeria atlantis (O&W/Pelham interpretation considers hesperis a separate species; NABA interpretation considers hesperis a subspecies of atlantis)
MPG	Speyeria atlantis	OH	EM	Y	Speyeria atlantis	Speyeria atlantis User beware: these two programs have different taxon concepts of Speyeria atlantis (O&W/Pelham interpretation considers hesperis a separate species; NABA interpretation considers hesperis a subspecies of atlantis)
MPG	Speyeria atlantis	Cas	PM	N	Speyeria atlantis	Speyeria atlantis
MPG	Speyeria atlantis	CO	PM	N	Speyeria atlantis	Speyeria atlantis
CO	Speyeria atlantis	MI	EM	Y	Speyeria atlantis	Speyeria atlantis User beware: these two programs have different taxon concepts of Speyeria atlantis (O&W/Pelham interpretation considers hesperis a separate species; NABA interpretation considers hesperis a subspecies of atlantis)
CO	Speyeria atlantis	OH	EM	Y	Speyeria atlantis	Speyeria atlantis User beware: these two programs have different taxon concepts of Speyeria atlantis (O&W/Pelham interpretation considers hesperis a separate species; NABA interpretation considers hesperis a subspecies of atlantis)
CO	Speyeria atlantis	Cas	PM	N	Speyeria atlantis	Speyeria atlantis
CO	Speyeria atlantis	MPG	PM	N	Speyeria atlantis	Speyeria atlantis
Cas	Speyeria hesperis	MI	Z	N	absent	There is no match in this list (species assumed absent)
Cas	Speyeria hesperis	OH	Z	N	absent	There is no match in this list (species assumed absent)
Cas	Speyeria hesperis	MPG	PM	N	Speyeria hesperis	Speyeria hesperis
Cas	Speyeria hesperis	CO	PM	N	Speyeria hesperis	Speyeria hesperis
MPG	Speyeria hesperis	MI	Z	N	absent	There is no match in this list (species assumed absent)
MPG	Speyeria hesperis	OH	Z	N	absent	There is no match in this list (species assumed absent)
MPG	Speyeria hesperis	Cas	PM	N	Speyeria hesperis	Speyeria hesperis
MPG	Speyeria hesperis	CO	PM	N	Speyeria hesperis	Speyeria hesperis
CO	Speyeria hesperis	MI	Z	N	absent	There is no match in this list (species assumed absent)
CO	Speyeria hesperis	OH	Z	N	absent	There is no match in this list (species assumed absent)
CO	Speyeria hesperis	Cas	PM	N	Speyeria hesperis	Speyeria hesperis
CO	Speyeria hesperis	MPG	PM	N	Speyeria hesperis	Speyeria hesperis
Cas	Anthocharis sara	MPG	PM	Y	Anthocharis sara	Anthocharis sara Geographic work by Stout (2018) shows that the Anthocharis occurring at Cascades and MPG is A. sara julia (some consider julia its own species).	reciprocal of line 637
Cas	Anthocharis sara (sensu Pelham)	CO	MM	Y	Anthocharis julia, Anthocharis thoosa	Anthocharis julia, Anthocharis thoosa User beware: Cascades considers Anthocharis sara to include sara, julia and thoosa as subspecies (as per Pelham). If you agree with this taxonomic perspective, then you should combine data for A. sara at Cascades with data for both A. julia and A. thoosa at Colorado. Colorado considers sara, julia and thoosa separate species (as per O&W). Geographic work by S…	similar to line 638 Reciprocal to 643,646
Cas	Anthocharis sara (sensu Pelham)	OC	EM	Y	Anthocharis sara (sensu O&W)	Anthocharis sara User beware: Cascades considers Anthocharis sara to include sara, julia and thoosa as subspecies (as per Pelham). If you agree with this taxonomy, then A. sara at Cascades matches at the species level with A. sara at Irvine, and data are combinable. Irvine considers sara, julia and thoosa separate species (as per O&W). Geographic work by Stout (2018) shows that the Anthocharis oc…	Similar to 634 Reciprocal of 640
MPG	Anthocharis sara	Cas	PM	Y	Anthocharis sara	Anthocharis sara Geographic work by Stout (2018) shows that the Anthocharis occurring at Cascades and MPG is A. sara julia (some consider julia its own species).	reciprocal of line 634
MPG	Anthocharis sara (sensu Pelham)	CO	MM	Y	Anthocharis julia, Anthocharis thoosa	Anthocharis julia, Anthocharis thoosa User beware: MPG considers Anthocharis sara to include sara, julia and thoosa as subspecies (as per Pelham). If you agree with this taxonomic perspective, then you should combine data for A. sara at MPG with data for both A. julia and A. thoosa at Colorado. Colorado considers sara, julia and thoosa separate species (as per O&W). Geographic work by Stout (2018…	similar to line 635 reciprocal of lines 644, 647
MPG	Anthocharis sara (sensu Pelham)	OC	PM	Y	Anthocharis sara (sensu O&W)	Anthocharis sara User beware: MPG considers Anthocharis sara to include sara, julia and thoosa as subspecies (as per Pelham). If you agree with this taxonomy, then A. sara at MPG matches at the species level with A. sara at Irvine, and data are combinable. Irvine considers sara, julia and thoosa separate species (as per O&W). Geographic work by Stout (2018) shows that the Anthocharis occurring at…	similar to 636 reciprocal of 641
Orange	Anthocharis sara (Sensu O&W)	Cas	Z	Y	Absent	Anthocharis sara User beware: Cascades considers Anthocharis sara to include sara, julia and thoosa as subspecies (as per Pelham). If you agree with this taxonomy, then A. sara at Cascades matches at the species level with A. sara at Irvine, and data are combinable. Irvine considers sara, julia and thoosa separate species (as per O&W). Geographic work by Stout (2018) shows that the Anthocharis oc…	We know from geography that Cascade project does not have A. sara (sensu O&W) present. Orange considers A. sara (sara) a species. But because the parallel search (line 647) is not Z, tool requires the same response as parallel (A. sara) and a flag. reciprocal of 636
Orange	Anthocharis sara (Sensu O&W)	MPG	Z	Y	Absent	Anthocharis sara User beware: Cascades considers Anthocharis sara to include sara, julia and thoosa as subspecies (as per Pelham). If you agree with this taxonomy, then A. sara at Cascades matches at the species level with A. sara at Irvine, and data are combinable. Irvine considers sara, julia and thoosa separate species (as per O&W). Geographic work by Stout (2018) shows that the Anthocharis oc…	We know from geography that MPG project does not have A. sara (sensu O&W) present. Orange considers A. sara (sara) a species. But because the parallel search (line 572) is not Z, tool requires the same response as parallel (A. sara) and a flag. reciprocal of 637
Orange	Anthocharis sara (Sensu O&W)	CO	Z	Y	Absent	Anthocharis julia, Anthocharis thoosa User beware: Irvine and Colorado (as per O&W) consider sara, julia and thoosa separate species. If you agree with this taxonomic perspective, then A. julia and A. thoosa data from Colorado are NOT comparable to Irvine A. sara and should not be combined. However, some (as per Pelham and NABA) consider sara, julia and thoosa to be subspecies of A. sara. If you …	We know from geography that the populations at CO and Orange are different. If considered species, as both these OW based programs do, then this search would have no compatible result. However, we opt here to put a flag in indicating that a Pelham-based perspective would give a very different result. To do this, the tool requires A. julia and A. thoosa as output, but we flag result so user can ma…
CO	Anthocharis julia	Cas	EM	Y	Anthocharis sara	Anthocharis sara User beware: Colorado considers sara, julia and thoosa separate species (as per O&W). Geographic work by Stout (2018) shows that the Anthocharis occurring at Cascades is julia. If you agree that these are distinct species, then data from A. sara at Cascades are combinable with data from A. julia at Colorado (do not include A. thoosa). Cascades considers Anthocharis sara to includ…	We know from geography that Cascade project does not have A. sara (sensu O&W = A.sara sara) present. Orange considers A. sara (sara) a species. But because the parallel search (line 647) is not Z, tool requires the same response as parallel (A. sara) and a flag. Similar to line 644
CO	Anthocharis julia	MPG	EM	Y	Anthocharis sara	Anthocharis sara User beware: Colorado considers sara, julia and thoosa separate species (as per O&W). Geographic work by Stout (2018) shows that the Anthocharis occurring at MPG is julia. If you agree that these are distinct species, then data from A. sara at MPG are combinable with data from A. julia at colorado. MPG considers Anthocharis sara to include sara, julia and thoosa as subspecies (as…	We know from geography that MPG project does not have A. sara (sensu O&W =A.sara sara) present. Orange considers A. sara (sara) a species. But because the parallel search (line 572) is not Z, tool requires the same response as parallel (A. sara) and a flag. Similar to line 643
CO	Anthocharis julia	OC	Z	Y	Absent	Anthocharis sara User beware: Colorado and Irvine (as per O&W) consider sara, julia and thoosa separate species. If you agree with this taxonomic perspective, then data from Colorado A. julia are NOT comparable to Irvine A. sara and should not be combined. However, some (as per Pelham and NABA) consider sara, julia and thoosa to be subspecies of A. sara. If you agree with this taxonomic perspecti…	We know from geography that the populations at CO and Orange are different. If considered species, as both these O&W based programs do, then this search would have no compatible result. However, we opt here to put a flag in indicating that a Pelham-based perspective would give a very different result. To do this, the tool requires A. julia and A. thoosa as output, but we flag result so user can m…
CO	Anthocharis thoosa	Cas	Z	Y	Absent	Anthocharis sara User beware: Colorado considers sara, julia and thoosa separate species (as per O&W). Geographic work by Stout (2018) shows that the Anthocharis occurring at Cascades is julia. If you agree that these are distinct species, then data from A. thoosa at Colorado are NOT combinable with A. sara data from Cascades. However, Cascades (as per Pelham) considers Anthocharis sara to includ…	We know from geography that the populations at CO and Orange are different. If considered species, as this O&W based receiver program does, then this search would have no compatible result. However, we opt here to put a flag in indicating that a Pelham-based perspective would give a very different result. To do this, the tool requires A. sara as output, but we flag result so user can make a decis…
CO	Anthocharis thoosa	MPG	Z	Y	Absent	Anthocharis sara User beware: Colorado considers sara, julia and thoosa separate species (as per O&W). Geographic work by Stout (2018) shows that the Anthocharis occurring at MPG is julia. If you agree that these are distinct species, then data from A. thoosa at Colorado are NOT combinable with A. sara data from MPG. However, MPG (as per Pelham) considers Anthocharis sara to include sara, julia a…	We know from geography that the populations at CO and Orange are different. If considered species, as this O&W based receiver program does, then this search would have no compatible result. However, we opt here to put a flag in indicating that a Pelham-based perspective would give a very different result. To do this, the tool requires A. sara as output, but we flag result so user can make a decis…
CO	Anthocharis thoosa	OC	Z	Y	Absent	Anthocharis sara User beware: Colorado and Irvine (as per O&W) consider sara, julia and thoosa separate species. If you agree with this taxonomic perspective, then data from Colorado A. thoosa is NOT comparable to Irvine A. sara and should not be combined. However, some (as per Pelham and NABA) consider sara, julia and thoosa to be subspecies of A. sara. If you agree with this taxonomic perspecti…	We know from geography that the populations at CO and Orange are different. If considered species, as both these O&W based programs do, then this search would have no compatible result. However, we opt here to put a flag in indicating that a Pelham-based perspective would give a very different result. To do this, the tool requires A. sara as output, but we flag result so user can make a decision …
IL	Celastrina ladon/neglecta	IA	EM	Y	Celastrina ladon	Celastrina ladon Proceed with caution. Projects disagree on whether neglecta is a distinct species, or a subspecies of C. ladon. User should assess compatibility.
IL	Celastrina ladon/neglecta	MI	PM	N	Celastrina ladon/neglecta	Celastrina ladon/neglecta
IL	Celastrina ladon/neglecta	OH	MM	Y	Celastrina ladon, C. neglecta	Celastrina ladon Celastrina neglecta Proceed with caution. Because one of these projects collects data without distinguishing the two species, data between these programs are NOT compatible UNLESS analyses combine data from both species at both projects.
IL	Celastrina ladon/neglecta	FL	MM	Y	Celastrina ladon, C. neglecta	Celastrina ladon Celastrina neglecta Proceed with caution. Because one of these projects collects data without distinguishing the two species, data between these programs are NOT compatible UNLESS analyses combine data from both species at both projects.
IL	Celastrina ladon/neglecta	Cas	MM	Y	Celastrina echo, C. lucia	Celastrina lucia Celastrina echo Proceed with caution. Projects disagree on whether lucia and echo are distinct species, or subspecies of C. ladon. User should assess compatibility.
IL	Celastrina ladon/neglecta	MPG	EM	Y	Celastrina echo	Celastrina echo Proceed with caution. Projects disagree on whether echo is a distinct species, or a subspecies of C. ladon. User should assess compatibility.
IL	Celastrina ladon/neglecta	CO	MM	Y	Celastrina ladon, Celastrina neglecta, Celastrina humulus	Celastrina ladon, Celastrina neglecta, Celastrina humulus Proceed with caution. Projects disagree on whether humulus is a distinct species, or a subspecies of C. ladon. User should assess compatibility.
IL	Celastrina ladon/neglecta	OC	EM	Y	Celastrina ladon echo	Celastrina ladon echo There is no exact match in this list. Proceed with caution. Projects use base lists that disagree on whether C. echo is a species or subspecies. User must assess compatibility.
IA	Celastrina ladon	IL	EM	Y	Celastrina ladon/neglecta	Celastrina ladon/neglecta Proceed with caution. Projects disagree on whether neglecta is a distinct species, or a subspecies of C. ladon. User should assess compatibility.
IA	Celastrina ladon	OH	MM	Y	Celastrina ladon, C. neglecta	Celastrina neglecta Celastrina ladon Proceed with caution. Projects disagree on whether neglecta is a distinct species, or a subspecies of C. ladon. User should assess compatibility.
IA	Celastrina ladon	TN	EM	Y	Celastrina ladon/neglecta	Celastrina neglecta Celastrina ladon Proceed with caution. Projects disagree on whether neglecta is a distinct species, or a subspecies of C. ladon. User should assess compatibility.
IA	Celastrina ladon	FL	MM	Y	Celastrina ladon, C. neglecta	Celastrina neglecta Celastrina ladon Proceed with caution. Projects disagree on whether neglecta is a distinct species, or a subspecies of C. ladon. User should assess compatibility.
IA	Celastrina ladon	Cas	MM	Y	Celastrina echo, C. lucia	Celastrina lucia Celastrina echo Proceed with caution. Projects disagree on whether lucia and echo are distinct species, or subspecies of C. ladon. User should assess compatibility.
IA	Celastrina ladon	MPG	EM	Y	Celastrina echo	Celastrina echo Proceed with caution. Projects disagree on whether echo is a distinct species, or a subspecies of C. ladon. User should assess compatibility.
IA	Celastrina ladon	CO	MM	Y	Celastrina ladon, Celastrina neglecta, Celastrina humulus	Celastrina ladon, Celastrina neglecta, Celastrina humulus Proceed with caution. Projects disagree on whether humulus is a distinct species, or a subspecies of C. ladon. User should assess compatibility.
IA	Celastrina ladon	OC	EM	N	Celastrina ladon echo
OH	Celastrina ladon	IL	Com	Y	Incomplete input (Celastrina ladon/neglecta)	Celastrina ladon/neglecta Proceed with caution. Only combine these data if C. ladon and C. neglecta from Ohio are both compared with C. ladon/neglecta from Illinois
OH	Celastrina neglecta	IL	Com	Y	Incomplete input (Celastrina ladon/neglecta)	Celastrina ladon/neglecta Proceed with caution. Only combine these data if C. ladon and C. neglecta from Ohio are both compared with C. ladon/neglecta from Illinois
OH	Celastrina ladon	IA	Com	Y	Incomplete input (Celastrina ladon)	Celastrina ladon Proceed with caution. Projects disagree on whether neglecta is a distinct species or a subspecies of C. ladon. Only combine these data if C. ladon and C. neglecta from Ohio are both compared with C. ladon from Iowa
OH	Celastrina neglecta	IA	Com	Y	Incomplete input (Celastrina ladon)	Celastrina ladon Proceed with caution. Projects disagree on whether neglecta is a distinct species or a subspecies of C. ladon. Only combine these data if C. ladon and C. neglecta from Ohio are both compared with C. ladon from Iowa
OH	Celastrina ladon	MI	Com	Y	Incomplete input (Celastrina ladon/neglecta)	Celastrina ladon/neglecta There is no exact match in this list. Proceed with caution. Only combine these data if C. ladon and C. neglecta from Ohio are both compared with C. ladon/neglecta from Michigan
OH	Celastrina neglecta	MI	Com	Y	Incomplete input (Celastrina ladon/neglecta)	Celastrina ladon/neglecta There is no exact match in this list. Proceed with caution. Only combine these data if C. ladon and C. neglecta from Ohio are both compared with C. ladon/neglecta from Michigan
OH	Celastrina ladon	TN	Com	Y	Incomplete input (Celastrina ladon/neglecta)	Celastrina ladon/neglecta There is no exact match in this list. Proceed with caution. Only combine these data if C. ladon and C. neglecta from Ohio are both compared with C. ladon/neglecta from Tennessee
OH	Celastrina neglecta	TN	Com	Y	Incomplete input (Celastrina ladon/neglecta)	Celastrina ladon/neglecta There is no exact match in this list. Proceed with caution. Only combine these data if C. ladon and C. neglecta from Ohio are both compared with C. ladon/neglecta from Tennessee
OH	Celastrina ladon	FL	PM	N	Celastrina ladon	Celastrina ladon
OH	Celastrina neglecta	FL	PM	N	Celastrina neglecta	Celastrina neglecta
OH	Celastrina ladon	Cas	MM	Y	Celastrina echo, C. lucia	Celastrina echo Celastrina lucia Proceed with caution. Projects disagree on whether C. echo and C. lucia are distinct species or subspecies of C. ladon. User should assess compatibility.
OH	Celastrina ladon	MPG	EM?	Y	Celastrina echo	Celastrina echo Proceed with caution. Projects disagree on whether C. echo is a distinct species or a subspecies of C. ladon. User should assess compatibility.	Celastrina echo Proceed with caution. Projects disagree on whether C. echo is a distinct species or a subspecies of C. ladon. User should assess compatibility.
OH	Celastrina ladon	CO		Y	Celastrina ladon, Celastrina humulus	Celastrina ladon Celastrina humulus Proceed with caution. Projects disagree on whether C. humulus is a distinct species or a subspecies of C. ladon. User should assess compatibility.
OH	Celastrina ladon	OC	EM	Y	Celastrina ladon echo	Celastrina ladon echo Proceed with caution. Projects disagree on whether echo is a distinct species or a subspecies of C. ladon. User should assess compatibility.
OH	Celastrina neglecta	Cas	Z		Absent	There is no match in this list (species assumed absent)
OH	Celastrina neglecta	MPG	Z		Absent	There is no match in this list (species assumed absent)
OH	Celastrina neglecta	CO	PM		Celastrina neglecta	Celastrina neglecta
OH	Celastrina neglecta	OC	Z		Absent	There is no match in this list (species assumed absent)
FL	Celastrina ladon	IL	Com	Y	Incomplete input (Celastrina ladon/neglecta)	Celastrina ladon/neglecta There is no exact match in this list. Proceed with caution. Data can only be combined if ladon and neglecta from both projects are considered together. Beware, these programs may have different taxon concepts of C. ladon (different subspecies interpretations). Especially problematic might be the interpretation of lucia. User should ensure compatibility.	IA combines ladon and neglecta data (as C. ladon)
FL	Celastrina neglecta	IL	Com	Y	Incomplete input (Celastrina ladon/neglecta)	IL combines ladon and neglecta data as C. ladon	IA combines ladon and neglecta data (as C. ladon)
FL	Celastrina ladon	IA	Com	Y	Incomplete input (Celastrina ladon)	Celastrina ladon Proceed with caution. Projects disagree on whether neglecta is a distinct species or a subspecies of C. ladon. Only combine these data if C. ladon and C. neglecta from Florida are both compared with C. ladon from Iowa	IA combines ladon and neglecta data (as C. ladon)
FL	Celastrina neglecta	IA	Com	Y	Incomplete input (Celastrina ladon)	Celastrina ladon Proceed with caution. Projects disagree on whether neglecta is a distinct species or a subspecies of C. ladon. Only combine these data if C. ladon and C. neglecta from Florida are both compared with C. ladon from Iowa	IA combines ladon and neglecta data (as C. ladon)
FL	Celastrina ladon	MI	Com	Y	Incomplete input (Celastrina ladon/neglecta)	Celastrina ladon/neglecta There is no exact match in this list. Proceed with caution. Data can only be combined if ladon and neglecta from both projects are considered together.	MI includes neglecta data with ladon (as C. ladon/neglecta)
FL	Celastrina neglecta	MI	Com	Y	Incomplete input (Celastrina ladon/neglecta)	Celastrina ladon/neglecta Proceed with caution. Data can only be combined if ladon and neglecta from both projects are considered together. Beware, these programs have different taxon concepts of C. ladon (Michigan includes lucia as a subspecies of ladon, where Florida considers this a separate species). User must ensure compatibility.	MI includes neglecta data with ladon (as C. ladon/neglecta)
FL	Celastrina ladon	OH		N	Celastrina ladon	Celastrina ladon
FL	Celastrina neglecta	OH	PM	N	Celastrina neglecta	Celastrina neglecta
FL	Celastrina ladon	TN	Com	Y	Incomplete input (Celastrina ladon/neglecta)	Celastrina ladon/neglecta There is no exact match in this list. Proceed with caution. Data can only be combined if ladon and neglecta from both projects are considered together.
FL	Celastrina neglecta	TN	Com	Y	Incomplete input (Celastrina ladon/neglecta)	Celastrina ladon/neglecta There is no exact match in this list. Proceed with caution. Data can only be combined if ladon and neglecta from both projects are considered together.
FL	Celastrina ladon	Cas	Z	N	absent	There is no match in this list (species assumed absent)	Florida base list is O&W - separates all Celastrinas to species so doesn't recognize Cas spp as equivalent to ladon. Since no match, then no flag
FL	Celastrina ladon	MPG	Z	N	absent	There is no match in this list (species assumed absent)	Florida base list is O&W - separates all Celastrinas to species so doesn't recognize MPG sp (echo) as equivalent to ladon Since no match, then no flag
FL	Celastrina ladon	CO		N	Celastrina ladon	Celastrina ladon	No flag here but just a note because this might come up at some point if a list includes C. serotina, while FL C. ladon is compatible with CO C. ladon, the underlying base lists that define these taxon concepts are not identlical: FL uses O&W (which probably includes serotina within ladon?), CO uses Pelham (C. serotina is a distinct species).
FL	Celastrina ladon	OC	Z	N	absent	There is no match in this list (species assumed absent)	No flag on absent output. Florida considers echo a different species. We might want to consider a flag that indicates this: e.g. "However, many consider echo a subspecies (and thus compatible with Florida). User must assess compatibility"
FL	Celastrina neglecta	Cas	Z	N	Absent	There is no match in this list (species assumed absent)	No flag on absent output. Florida considers C. neglecta, C. echo and C. lucia separate species
FL	Celastrina neglecta	MPG	Z	N	Absent	There is no match in this list (species assumed absent)	No flag on absent output. MPG considers C. neglecta, C. echo and C. lucia separate species
FL	Celastrina neglecta	CO	PM	N	Celastrina neglecta	Celastrina neglecta
FL	Celastrina neglecta	OC	Z	N	Absent	There is no match in this list (species assumed absent)	neglecta is not found in Irvine. No flag
Cas	Celastrina echo	IL	Z	N	Absent	There is no match in this list (species assumed absent)	"echo" is not found in IL.
Cas	Celastrina echo	IA	Z	N	Absent	There is no match in this list (species assumed absent)	"echo" is not found in IA
Cas	Celastrina echo	MI	Z	N	Absent	There is no match in this list (species assumed absent)	"echo" is not found in MI
Cas	Celastrina echo	OH	Z	N	Absent	There is no match in this list (species assumed absent)	"echo" is not found in OH
Cas	Celastrina echo	TN	Z	N	Absent	There is no match in this list (species assumed absent)	"echo" is not found in TN
Cas	Celastrina echo	FL	Z	N	Absent	There is no match in this list (species assumed absent)	"echo" is not found in FL
Cas	Celastrina echo	MPG	PM	N	Celastrina echo	Celastrina echo
Cas	Celastrina echo	CO	Z	N	Absent	There is no match in this list (species assumed absent)	"echo" is not found in CO
Cas	Celastrina echo	OC	EM	N	Celastrina ladon echo	Celastrina ladon echo
Cas	Celastrina lucia	IL	Z	N	Absent	There is no match in this list (species assumed absent)	"lucia" does not occur in IL
Cas	Celastrina lucia	IA	Z	N	Absent	There is no match in this list (species assumed absent)	"lucia" does not occur IA
Cas	Celastrina lucia	MI	Z	y	Celastrina ladon/neglecta	Celastrina ladon/neglecta	Need a flag: lucia does occur in MI, and would be collected as C. ladon/neglecta. User beware: MI is not returning pure lucia, so this may not be compatible with Cascades data.
Cas	Celastrina lucia	OH	Z	N	Absent	There is no match in this list (species assumed absent)	"lucia" is not found in OH
Cas	Celastrina lucia	TN	Z	N	Absent	There is no match in this list (species assumed absent)	"lucia" is not found in TN
Cas	Celastrina lucia	FL	Z	N	Absent	There is no match in this list (species assumed absent)	"lucia" is not found in FL
Cas	Celastrina lucia	MPG	Z	N	Absent	There is no match in this list (species assumed absent)	"lucia" is not found at MPG
Cas	Celastrina lucia	CO	Z	N	Absent	There is no match in this list (species assumed absent)	"lucia" is not found in CO
Cas	Celastrina lucia	OC	Z	N	Absent	There is no match in this list (species assumed absent)	"lucia" is not found at Irvine
MPG	Celastrina echo	IL	Z	N	Absent	There is no match in this list (species assumed absent)
MPG	Celastrina echo	IA	Z	N	Absent	There is no match in this list (species assumed absent)
MPG	Celastrina echo	MI	Z	N	Absent	There is no match in this list (species assumed absent)
MPG	Celastrina echo	OH	Z	N	Absent	There is no match in this list (species assumed absent)
MPG	Celastrina echo	TN	Z	N	Absent	There is no match in this list (species assumed absent)
MPG	Celastrina echo	FL	Z	N	Absent	There is no match in this list (species assumed absent)
MPG	Celastrina echo	Cas	PM	N	Celastrina echo	Celastrina echo
MPG	Celastrina echo	CO	Z	N	Absent	There is no match in this list (species assumed absent)
MPG	Celastrina echo	OC	EM	N	Celastrina ladon echo	Celastrina ladon echo
CO	Celastrina ladon	IL	Com	Y	Celastrina ladon/neglecta	Celastrina ladon/neglecta Because in this case the donor projects collects data without distinguishing taxa as two species, data between these programs are NOT compatible UNLESS the receiver project analyses data from C. ladon and C. neglecta together.	Did we stop adding flags this point? At some point change this flag to: …unless data from both species is included from the receiver.
CO	Celastrina ladon	IA	Com	Y	Celastrina ladon/neglecta	Celastrina ladon/neglecta Because in this case the donor projects collects data without distinguishing taxa as two species, data between these programs are NOT compatible UNLESS the receiver project analyses data from C. ladon and C. neglecta together.	I think this flag should actually read: There is no exact match in this list. Proceed with caution. If you believe C. ladon to be a species complex including echo, lucia, humulus, idella, etc. then you might consider combining Irvine's C. ladon echo data. (Or perhaps use wording in column J)
CO	Celastrina ladon	MI	Com	Y	Celastrina ladon/neglecta	Celastrina ladon/neglecta Because in this case the donor projects collects data without distinguishing taxa as two species, data between these programs are NOT compatible UNLESS the receiver project analyses data from C. ladon and C. neglecta together.
CO	Celastrina ladon	OH	PM	N	Celastrina ladon	Celastrina ladon	no deviation, but geography makes these compatible not taxonomy. That is, humulus doesn't occur in OH, but if it did, OH (NABA) would include in ladon. Colorado separates it out as its own species.
CO	Celastrina ladon	TN	Com	Y	Celastrina ladon/neglecta	Celastrina ladon/neglecta Because in this case the donor projects collects data without distinguishing taxa as two species, data between these programs are NOT compatible UNLESS the receiver project analyses data from C. ladon and C. neglecta together.
CO	Celastrina ladon	FL	PM	N	Celastrina ladon	Celastrina ladon
CO	Celastrina ladon	Cas	Z	N	Absent	There is no match in this list (species assumed absent)
CO	Celastrina ladon	MPG	Z	N	Absent	There is no match in this list (species assumed absent)
CO	Celastrina ladon	OC	Z	N	Absent	There is no match in this list (species assumed absent)	No flag on absent output. Florida considers echo a different species. We might want to consider a flag that indicates this: e.g. "However, many consider echo a subspecies (and thus compatible with Florida). User must assess compatibility"
CO	Celastrina neglecta	IL	Com	Y	Celastrina ladon/neglecta	Celastrina ladon/neglecta Because in this case the donor project collects data without distinguishing taxa as two species, data between these programs are NOT compatible UNLESS the receiver project analyses data from C. ladon and C. neglecta together.
CO	Celastrina neglecta	IA	Com	Y	Celastrina ladon	Celastrina ladon Because in this case the donor project collects data without distinguishing taxa as two species, data between these programs are NOT compatible UNLESS the receiver project analyses data from C. ladon and C. neglecta together.
CO	Celastrina neglecta	MI	Com	Y	Celastrina ladon/neglecta	Celastrina ladon/neglecta Because in this case the donor project collects data without distinguishing taxa as two species, data between these programs are NOT compatible UNLESS the receiver project analyses data from C. ladon and C. neglecta together.
CO	Celastrina neglecta	OH	PM	N	Celastrina neglecta	Celastrina neglecta
CO	Celastrina neglecta	TN	Com	Y	Celastrina ladon/neglecta	Celastrina ladon/neglecta Because in this case the donor project collects data without distinguishing taxa as two species, data between these programs are NOT compatible UNLESS the receiver project analyses data from C. ladon and C. neglecta together.
CO	Celastrina neglecta	FL	PM	N	Celastrina neglecta	Celastrina neglecta
CO	Celastrina neglecta	Cas	Z	N	Absent	There is no match in this list (species assumed absent)
CO	Celastrina neglecta	MPG	Z	N	Absent	There is no match in this list (species assumed absent)
CO	Celastrina neglecta	OC	Z	N	Absent	There is no match in this list (species assumed absent)
Orange	Celastrina ladon echo	IL	COM	Y	Celastrina ladon/neglecta	Celastrina ladon/neglecta Donor returns data at a higher taxonomic level than receiver data - user must carefully assess compatibility.	This is very tricky because receiver is at lower level than donor. From Irvine's perspective, they might want to combine data at species level (ladon) or subspecies level (echo). Only ladon occurs in IL, but it is not distinct from neglecta, so user must assess compatibility
Orange	Celastrina ladon echo	IA	COM	Y	Celastrina ladon	Celastrina ladon Donor returns data at a higher taxonomic level than receiver data - user must carefully assess compatibility.	From Irvine's perspective, they might want to combine data at species level (ladon) or subspecies level (echo). Only ladon occurs in IA, not echo. User must assess.
Orange	Celastrina ladon echo	MI	COM	Y	Celastrina ladon/neglecta	Celastrina ladon/neglecta Donor returns data at a higher taxonomic level than receiver data - user must carefully assess compatibility.	This is very tricky because receiver is at lower level than donor. From Irvine's perspective, they might want to combine data at species level (ladon) or subspecies level (echo). Only ladon occurs in IL, but it is not distinct from neglecta, so user must assess compatibility
Orange	Celastrina ladon echo	OH	COM	Y	Celastrina ladon	Celastrina ladon Donor returns data at a higher taxonomic level than receiver data - user must carefully assess compatibility.	From Irvine's perspective, they might want to combine data at species level (ladon) or subspecies level (echo). Only ladon occurs in IA, not echo. User must assess.
Orange	Celastrina ladon echo	TN	COM	Y	Celastrina ladon/neglecta	Celastrina ladon/neglecta Donor returns data at a higher taxonomic level than receiver data - user must carefully assess compatibility.	This is very tricky because receiver is at lower level than donor. From Irvine's perspective, they might want to combine data at species level (ladon) or subspecies level (echo). Only ladon occurs in IL, but it is not distinct from neglecta, so user must assess compatibility
Orange	Celastrina ladon echo	FL	COM	Y	Celastrina ladon	Celastrina ladon Donor returns data at a higher taxonomic level than receiver data - user must carefully assess compatibility.	From Irvine's perspective, they might want to combine data at species level (ladon) or subspecies level (echo). Only ladon occurs in IA, not echo. User must assess.
Orange	Celastrina ladon echo	Cas	EM	Y	Celastrina echo	Celastrina echo	Irvine C.l.echo matches Cas C.echo concept
Orange	Celastrina ladon echo	MPG	EM	Y	Celastrina echo	Celastrina echo	Irvine C.l.echo matches MPG C.echo concept
Orange	Celastrina ladon echo	CO	COM	Y	Celastrina ladon	Celastrina ladon Donor returns data at a higher taxonomic level than receiver data - user must carefully assess compatibility.	From Irvine's perspective, they might want to combine data at species level (ladon) or subspecies level (echo). Only ladon occurs in CO, not echo. User must assess.
CO	Celastrina humulus	IL	Z	N	absent	Celastrina ladon/neglecta Proceed with caution. Conflicting taxonomic concepts of C. ladon complicate data combination in this case. User must assess compatibility. If the user views humulus and neglecta as subspecies of ladon, then data from these programs are compatible, but only if all taxa (ladon, humulus, neglecta, ladon/neglecta) from both programs are combined. If the user views humulus, n…	geographically not present, but to make reciprocal searches equivalent (as required by tool) and allow us to flag this problem for the user, we return a donor response with commentary, rather than absent.
CO	Celastrina humulus	IA	Z	N	absent	Celastrina ladon Proceed with caution. Conflicting taxonomic concepts of C. ladon complicate data combination in this case. User must assess compatibility. If user views humulus and neglecta as subspecies of C. ladon, data can be combined, but only if all three taxa from Colorado (C. ladon, C. neglecta, and C. humulus) are included in the analysis. If user views C. humulus and C. neglecta as dist…	geographically not present, but to make reciprocal searches equivalent (as required by tool) and allow us to flag this problem for the user, we return a donor response with commentary, rather than absent.
CO	Celastrina humulus	MI	Z	N	absent	Celastrina ladon/neglecta Proceed with caution. Conflicting taxonomic concepts of C. ladon complicate data combination in this case. User must assess compatibility. If the user views humulus and neglecta as subspecies of ladon, then data from these programs are compatible, but only if all taxa (ladon, humulus, neglecta, ladon/neglecta) from both programs are combined. If the user views humulus, n…	geographically not present, but to make reciprocal searches equivalent (as required by tool) and allow us to flag this problem for the user, we return a donor response with commentary, rather than absent.
CO	Celastrina humulus	OH	Z	N	absent	Celastrina neglecta Celastrina ladon Proceed with caution. Conflicting taxonomic concepts of C. ladon complicate data combination in this case. User must assess compatibility. If user views humulus as subspecies of C. ladon, data can be combined but only if C. ladon and C. humulus from Colorado are combined with C. ladon and C. neglecta from Ohio. If user views humulus as a distinct species from …	geographically not present, but to make reciprocal searches equivalent (as required by tool) and allow us to flag this problem for the user, we return a donor response with commentary, rather than absent.
CO	Celastrina humulus	TN	Z	N	absent	Celastrina ladon/neglecta Proceed with caution. Conflicting taxonomic concepts of C. ladon complicate data combination in this case. User must assess compatibility. If the user views humulus and neglecta as subspecies of ladon, then data from these programs are compatible, but only if all taxa (ladon, humulus, neglecta, ladon/neglecta) from both programs are combined. If the user views humulus, n…	geographically not present, but to make reciprocal searches equivalent (as required by tool) and allow us to flag this problem for the user, we return a donor response with commentary, rather than absent.
CO	Celastrina humulus	FL	Z	N	absent	Celastrina neglecta Celastrina ladon Proceed with caution. Conflicting taxonomic concepts of C. ladon complicate data combination in this case. User must assess compatibility. If user views humulus and neglecta as subspecies of C. ladon, data can be combined but only if both C. ladon and C. neglecta from Florida are combined with C. ladon, C. humulus, and C. neglecta from Colorado. If user views …	geographically not present, but to make reciprocal searches equivalent (as required by tool) and allow us to flag this problem for the user, we return a donor response with commentary, rather than absent.
CO	Celastrina humulus	Cas	Z	N	absent	Celastrina echo Celastrina lucia Proceed with caution. Conflicting taxonomic concepts of C. ladon complicate data combination in this case. User must assess compatibility. If user considers echo, lucia, humulus, and neglecta to be subspecies within C. ladon, then data are compatible as long as both C. echo and C. lucia from Cascades are combined with C. ladon, C. humulus, and C. neglecta from Col…	geographically not present, but to make reciprocal searches equivalent (as required by tool) and allow us to flag this problem for the user, we return a donor response with commentary, rather than absent.
CO	Celastrina humulus	MPG	Z	N	absent	Celastrina echo Proceed with caution. Conflicting taxonomic concepts of C. ladon complicate data combination in this case. User must assess compatibility. If user considers echo, humulus, and neglecta to be subpecies of C. ladon, then data are compatible if C. echo from MPG is combined with C. ladon, C. humulus, and C. neglecta from Colorado. If user considers C. echo, C. humulus, and C. neglecta…	geographically not present, but to make reciprocal searches equivalent (as required by tool) and allow us to flag this problem for the user, we return a donor response with commentary, rather than absent.
CO	Celastrina humulus	OC	Z	N	absent	Celastrina ladon echo Proceed with caution. Conflicting taxonomic concepts of C. ladon complicate data combination in this case. User must assess compatibility. If user considers echo, humulus, and neglecta to be subpecies of C. ladon, then data are compatible if C. ladon, C. humulus, and C. neglecta from Colorado are combined with C. ladon echo from Orange. If user considers C. echo, C. humulus,…	geographically not present, but to make reciprocal searches equivalent (as required by tool) and allow us to flag this problem for the user, we return a donor response with commentary, rather than absent.
MI	Celastrina ladon/neglecta	CO	MM	Y	Celastrina ladon, Celastrina neglecta, Celastrina humulus	Celastrina neglecta Celastrina humulus Celastrina ladon Proceed with caution. Conflicting taxonomic concepts of C. ladon complicate data combination in this case. User must assess compatibility. If the user views humulus and neglecta as subspecies of ladon, then data from these programs are compatible, but only if all taxa (ladon, humulus, neglecta, ladon/neglecta) from both programs are combined…
MI	Celastrina ladon/neglecta	Cas	MM	Y	Celastrina echo, Celastrina lucia	Celastrina echo Celastrina lucia Proceed with caution. Conflicting taxonomic concepts of C. ladon complicate data combination in this case. User must assess compatibility. If the user views lucia, echo, and neglecta as subspecies of ladon, then data from these programs are compatible, but only if all taxa (lucia, echo, ladon/neglecta) from both programs are combined. If the user views lucia, echo…
TN	Celastrina ladon/neglecta	CO	MM	Y	Celastrina ladon, Celastrina neglecta, Celastrina humulus	Celastrina neglecta Celastrina humulus Celastrina ladon Proceed with caution. Conflicting taxonomic concepts of C. ladon complicate data combination in this case. User must assess compatibility. If the user views humulus and neglecta as subspecies of ladon, then data from these programs are compatible, but only if all taxa (ladon, humulus, neglecta, ladon/neglecta) from both programs are combined…
TN	Celastrina ladon/neglecta	Cas	MM	Y	Celastrina echo, Celastrina lucia	Celastrina echo Celastrina lucia Proceed with caution. Conflicting taxonomic concepts of C. ladon complicate data combination in this case. User must assess compatibility. If the user views lucia, echo, and neglecta as subspecies of ladon, then data from these programs are compatible, but only if all taxa (lucia, echo, ladon/neglecta) from both programs are combined. If the user views lucia, echo…
